# Supplementary material
Source: MDPI journal article supplement (https://www.mdpi.com/1996-1073/14/18/5989)
Supplement: s1 [file s1]

# Supplementary Materials: Critical Review of Intelligent Battery Systems: Challenges, Implementation, and Potential for Electric Vehicles

Lidiya Komsiyyska <sup>1\*</sup>, Tobias Buchberger<sup>1</sup>, Simon Diehl <sup>1</sup>, Moritz Ehrensberger <sup>1</sup>, Christian Hanzl <sup>1,2</sup>, Christoph Hartmann <sup>1</sup>, Markus Hölzle <sup>1</sup>, Jan Kleiner <sup>1</sup>, Meinert Lewerenz <sup>1</sup>, Bernhard Liebhart <sup>1,3</sup>, Michael Schmid <sup>1,3</sup>, Dominik Schneider <sup>1</sup>, Sascha Speer <sup>1</sup>, Julia Stöttner <sup>1</sup>, Christoph Terbrack <sup>1</sup>, Michael Hinterberger <sup>2</sup> and Christian Endisch <sup>1,3</sup>

**Table S1.** Overview of investigated publications regarding online EIS, part I of II: Excitation and Signal Acquisition.

| Source                  | Excitation                   |                                                       |                                                                                                                                                | Signal Acquisition                                                                                                                                                                           |                                                                                                                                                                                                                                                                          |                                                                                                                                                                   |
|-------------------------|------------------------------|-------------------------------------------------------|------------------------------------------------------------------------------------------------------------------------------------------------|----------------------------------------------------------------------------------------------------------------------------------------------------------------------------------------------|--------------------------------------------------------------------------------------------------------------------------------------------------------------------------------------------------------------------------------------------------------------------------|-------------------------------------------------------------------------------------------------------------------------------------------------------------------|
|                         | Type                         | Signal                                                | Actuator                                                                                                                                       | System                                                                                                                                                                                       | AFE                                                                                                                                                                                                                                                                      | ADC                                                                                                                                                               |
| Alavi et al. [291]      | Galvanostatic                | Multi-Sine superimposed on an offset                  | Single quadrant TTI electronic load                                                                                                            | NI 6211 Multifunction IO-Device, responsible for data acquisition and controlling the electronic load                                                                                        | CSR as current sensor; undefined voltage sensor; current and voltage are both buffered by a differential amplifier, filtered by a HPF (1 Hz cutoff) and amplified; signals are multiplexed single-ended to a PGA, followed by the ADC inside the data acquisition device | Undefined 1×16 bit consecutively sampling, multiplexed ADC of data acquisition device                                                                             |
| Bohlen et al. [269]     | Load Current                 | –                                                     | Undefined laboratory battery test bench                                                                                                        | Self-developed system based on an undefined MCU, responsible for data acquisition, estimation of Z and evaluation                                                                            | CSR as current sensor; remainder of channel is undefined                                                                                                                                                                                                                 | Undefined ADC                                                                                                                                                     |
| Carbonnier et al. [321] | Galvanostatic                | Square                                                | Undefined constant current sink/source controlled by a square wave generator                                                                   | Two separate systems:<br>(1) 2× NI PXIe-4081 for low freq.<br>(2) FPGA based design for high freq.                                                                                           | Undefined voltage and current sensors; signals are amplified, multiplexed and amplified again                                                                                                                                                                            | (1) 7 1/2-digit DMM at up to 250 S s <sup>−1</sup><br>(2) 2×16 bit at up to 100 kS s <sup>−1</sup>                                                                |
| Carkhuff et al. [140]   | Galvanostatic                | Sine                                                  | Undefined bidirectional current source                                                                                                         | Self-developed system based on an undefined MCU, responsible for excitation and estimation of Z                                                                                              | Current is not measured (excitation is assumed to be accurate); multiplexed voltage measurement of individual cells; HPF followed by a non-inverting amplifier feeding an RMS converter for magnitude estimation and a GPIO of the MCU for phase detection               | MCU internal 1×12 bit ADC                                                                                                                                         |
| Depernet et al. [292]   | Galvanostatic                | Sine                                                  | Bidirectional DC-DC converter with current control (part of the charger)                                                                       | Self-developed system based on a TI TMS320LF2407A MCU, responsible for excitation, data acquisition and estimation of Z                                                                      | Undefined voltage and current sensors; digital Attenuator for gain control; DAC and difference amplifier for offset-control; LPF for anti-aliasing                                                                                                                       | MCU internal 1×10 bit ADC, sampling synchronized with PWM for disturbance rejection; consecutive voltage and current sampling                                     |
| Din et al. [296]        | Galvanostatic                | Sine                                                  | Bidirectional DC-DC converter with current control (part of a ladder converter for active balancing)                                           | Self-developed system based on a Xilinx Virtex 5 FPGA, responsible for generation and control of PWM, data acquisition and data filtering                                                    | CSR as current sensor only measuring balancing/ excitation currents; amplified by two stages and filtered by a 2nd order LPF; digital DC servo-loop circuit to remove DC offset before digitization; 4th order LPF with 100 kHz cutoff                                   | 3× (2×12 bit TI ADS7254 SAR-ADC) sampling simultaneously; one chip per cell and one for the cell stack (synchronized by a shared trigger and communication clock) |
| Ferrero et al. [301]    | Galvanostatic                | Multi-Sine superimposed on load current               | DC-DC boost converter with current control and resistive load (control is implemented in real time unit of SBC)                                | Self-developed system based on a BeagleBone Black SBC (TI AM3358 Cortex-A8 Processor), responsible for excitation, data acquisition, filtering, estimation of Z and ECM parameter estimation | LEM LA25-P closed-loop Hall current transducer; undefined voltage sensor; undefined LPF & HPF for current and voltage signals; undefined signal conditioning to match ADC specifications                                                                                 | Processor internal 1×12 bit SAR-ADC, sampling voltage and current consecutively                                                                                   |
| Gong et al. [290]       | Galvanostatic                | Sine                                                  | Hybrid architecture for reduced power dissipation, consisting of an isolated switched mode converter, a linear regulator and an ultracapacitor | ASIC based system (SCS) developed in cooperation with NXP Semiconductors; distributed system for impedance estimation and excitation on a cell level and central measurement of pack current | Sigma-Delta-Modulator as voltage sensor; excitation current is not measured but assumed to be accurate; pack current is measured using a CSR as a current sensor and the AFE of a separate SCS, that is not connected to a cell                                          | 1× integrated unspecified Sigma-Delta-Modulator, outputting a bitstream                                                                                           |
| Hong et al. [303]       | Galvanostatic                | Sine superimposed on an offset                        | DC-DC boost converter with current control and resistive load                                                                                  | Self-developed system based on an undefined MCU, responsible for excitation and data acquisition                                                                                             | CSR as current sensor; undefined voltage sensors for simultaneous measurement of series connected batteries                                                                                                                                                              | Undefined ADC                                                                                                                                                     |
| Howey et al. [207]      | Galvanostatic                | White noise & Multi-Sine superimposed on load current | Motor controller in current control mode                                                                                                       | NI 6211 Multifunction IO-Device, responsible for excitation and data acquisition                                                                                                             | CSR as current sensor; two stage amplification for voltage and current; HPF with 1 Hz cutoff frequency between stages; total gain of frontend is 100                                                                                                                     | Undefined 1×16 bit consecutively sampling, multiplexed ADC of data acquisition device                                                                             |
| Koch et al. [299]       | Galvanostatic                | Triangle                                              | Bidirectional DC-DC converter with current control (part of the charger)                                                                       | Self-developed system based on dsPIC33EP DSP and a STEVAL-IHM011V1 evaluation kit, responsible for excitation and data acquisition                                                           | Undefined current and voltage sensors; signals are filtered by an active 4th order Butterworth filter with cutoff at 16 kHz                                                                                                                                              | 2×16 bit MCP3903 delta-sigma ADC, sampling simultaneously; sampling is synchronized with PWM for improved disturbance rejection                                   |
| Liebhart et al. [112]   | Load current                 | –                                                     | Keysight RP7942A regenerative power system (for emulation of driving current)                                                                  | NI CompactDAQ data acquisition system, responsible for measuring current, voltage and temperature                                                                                            | LEM LA 55-P/SP1 Hall current transducer with current output, digitized by NI-9203; cell voltage digitized by NI-9239                                                                                                                                                     | ADCs of CompactDAQ modules, 4×16 bit for current and 4×24 bit for voltage sensing with at least 25 kS s <sup>−1</sup>                                             |
| Lohmann et al. [308]    | Load current                 | –                                                     | Electronic load in a self-developed cell tester with linear and switched mode excitation                                                       | Self-developed single cell tester based on an undefined 32bit MCU (commercially available as EISmeter)                                                                                       | CSR as current sensor; remainder of channel is undefined                                                                                                                                                                                                                 | Undefined 1×18 bit consecutively sampling ADC for acquisition of current and voltage signals                                                                      |
| Moore et al. [302]      | Galvanostatic                | Multi-sine                                            | Bidirectional DC-DC converter and resistive load                                                                                               | NI USB 6366 data acquisition device, responsible for excitation and data acquisition                                                                                                         | Undefined LEM Hall module as current sensor; current and voltage are filtered by a 4th order Butterworth LPF to reduce switching frequency components of actuator                                                                                                        | Undefined 2×16 bit ADCs of data acquisition device for current and voltage                                                                                        |
| Nguyen et al. [300]     | Galvanostatic                | Sine                                                  | Bidirectional DC-DC converter with current control (part of the charger)                                                                       | Self-developed system based on a TI TMS320F28335 DSP, responsible for excitation, data acquisition and estimation of Z                                                                       | Undefined current and voltage sensors                                                                                                                                                                                                                                    | DSP internal 1×12 bit pipelined ADC, sampling current and voltage consecutively                                                                                   |
| Piret et al. [305]      | Galvanostatic & load current | PRBS & load current                                   | BioLogic VMP3 potentiostat for generating the PRBS                                                                                             | Oros OR36 data acquisition device, responsible for data acquisition                                                                                                                          | CSR as current sensor; remainder of channel is undefined                                                                                                                                                                                                                 | Undefined 2×24 bit simultaneous sampling ADCs of data acquisition system for voltage and current                                                                  |

| Source                 | Type          | Signal                                                 | Actuator                                                                                                                                             | System                                                                                                                                                                                                                              | AFE                                                                                                  | ADC                                                                                                   |
|------------------------|---------------|--------------------------------------------------------|------------------------------------------------------------------------------------------------------------------------------------------------------|-------------------------------------------------------------------------------------------------------------------------------------------------------------------------------------------------------------------------------------|------------------------------------------------------------------------------------------------------|-------------------------------------------------------------------------------------------------------|
| Qahouq et al. [304]    | Galvanostatic | Approx. exponential pulse superimposed on load current | Closed-loop buck-boost DC-DC converters with voltage control and capacitive load; two in series with inverse phase to cancel out each other's ripple | Self-developed system based on TI TMS320F28335 DSP, responsible for excitation and data acquisition                                                                                                                                 | Undefined current and voltage sensors                                                                | DSP internal 1×12 bit pipelined ADC, sampling current and voltage consecutively                       |
| Roscher et al. [310]   | Load current  | –                                                      | –                                                                                                                                                    | Self-developed distributed system based on a TI MSP430F235, responsible for measuring cell voltage and estimation of Z; synchronization is provided by a radio signal; CECU measures current centrally and broadcasts data to LECUs | Undefined current and voltage sensors; remainder of channel is undefined                             | MCU internal 1×12 bit SAR-ADC                                                                         |
| Sihvo et al. [295]     | Galvanostatic | PRBS                                                   | Undefined electronic load                                                                                                                            | NI USB-6363 data acquisition device, responsible for excitation and data acquisition                                                                                                                                                | Testec HV differential probe as voltage sensor; Tektronix clamp-on current probe as current sensor   | Undefined 2×16 bit ADCs of data acquisition device for current and voltage                            |
| Sockeel et al. [306]   | Load current  | –                                                      | –                                                                                                                                                    | Undefined system, responsible for data acquisition                                                                                                                                                                                  | Undefined current and voltage sensors; remainder of channel is undefined                             | Undefined ADCs, sampling at $20\text{ S s}^{-1}$                                                      |
| Wang et al. [154]      | Galvanostatic | Sine                                                   | Class A amplifier used as a controllable current source                                                                                              | Self-developed system based on an undefined MCU, responsible for excitation, data acquisition and estimation of Z                                                                                                                   | CSR as current sensor; undefined voltage sensor and signal conditioning                              | MCU internal ADCs of undefined resolution for voltage and current                                     |
| Wei et al. [311]       | Galvanostatic | Sine                                                   | DC-AC converter with current control based on a full-bridge                                                                                          | Self-developed distributed system consisting of one CECU and many LECUs, connected via CAN; local voltage measurement and estimation of Z; central current measurement (CECU); LECU is based on a TI TMS320F2812 DSP                | CSR as current sensor; cell voltage and current are amplified by unspecified differential amplifiers | LECU: 6×18 bit ADI AD7608 bipolar SAR-ADC, sampling all channels simultaneously; CECU: Undefined ADCs |
| Yokoshima et al. [320] | Galvanostatic | Square superimposed on load current                    | Power controller of energy storage system                                                                                                            | DT9837 data logger, responsible for excitation and data acquisition                                                                                                                                                                 | Undefined voltage and current sensors; remainder of channel is undefined                             | Undefined 2×24 bit ADCs of data acquisition device, sampling simultaneously                           |

**Abbreviations:** Z=Impedance; DFT=Discrete Fourier transform; FFT=Fast Fourier transform; PRBS=Pseudorandom binary sequence; CSR=Current sense resistor; MCU=Microcontroller unit; DSP=Digital signal processor; CECU=Central electronic control unit; LECU=Local electronic control unit; SBC=Single board computer; SCS=Single cell supervisor; FPGA=Field programmable gate array; HPF=High-pass filter; LPF=Low-pass filter; BPF=Band-pass filter; CIC=Cascaded integrator-comb; OTP=One time programmable; DLIA=Digital lock-in amplifier; GPIO=General-purpose input/output; PWM=Pulse-width modulation, CAN=Controller Area Network

**Table S2.** Overview of investigated publications regarding online EIS, part II of II: Evaluation and Setup.

| Source                  | Evaluation                                                                                                                                                                                                                                                                                                                                                               |                                                                                                                                                                           |                    | Setup                                   |                   |                                                                          |
|-------------------------|--------------------------------------------------------------------------------------------------------------------------------------------------------------------------------------------------------------------------------------------------------------------------------------------------------------------------------------------------------------------------|---------------------------------------------------------------------------------------------------------------------------------------------------------------------------|--------------------|-----------------------------------------|-------------------|--------------------------------------------------------------------------|
|                         | Preprocessing                                                                                                                                                                                                                                                                                                                                                            | Postprocessing                                                                                                                                                            | Computation Device | Cell Type                               | Frequency Range   | Validity Check                                                           |
| Alavi et al. [291]      | –                                                                                                                                                                                                                                                                                                                                                                        | Time domain fitting of a fractional model for direct ECM parameter estimation                                                                                             | Computer           | A123 Systems 26650 Li-Ion LFP 2.3 Ah    | 1 Hz - 2 kHz      | Comparison to results of a Bio-Logic VSP                                 |
| Bohlen et al. [269]     | Digital BPFs for frequencies of interest                                                                                                                                                                                                                                                                                                                                 | Correlation-based estimation of Re(Z); estimation of ECM parameters for prediction of cranking capability                                                                 | MCU                | Undefined Lead Acid                     | –                 | Check of predicted cranking capability                                   |
| Carbonnier et al. [321] | –                                                                                                                                                                                                                                                                                                                                                                        | FFT based estimation of magnitude and phase of harmonics of excitation; estimation of Z from FFT data                                                                     | Computer           | Sony 18650HC Li-Ion                     | 10 mHz - 10 Hz    | –                                                                        |
| Carkhuff et al. [140]   | –                                                                                                                                                                                                                                                                                                                                                                        | Phase is measured using an MCU internal 16 bit timer; magnitude of Z is calculated from RMS value of response                                                             | MCU                | Swing 5300 2 × MR18650 Li-Ion 5.3 Ah    | 1 Hz - 1 kHz      | –                                                                        |
| Depernet et al. [292]   | Gain and offset adjustment, single frequency DFT                                                                                                                                                                                                                                                                                                                         | PSD based estimation of Z                                                                                                                                                 | MCU                | VRLA AGM Lead Acid 12 V 100 Ah          | 0.32 Hz - 1024 Hz | Comparison to results of a Zahner IM6 spectrometer                       |
| Din et al. [296]        | Variable down sampling to a fixed number of points per perturbation period using a CIC decimation filter, allows to use the same processing to extract Z at all frequencies; FIR filtering & truncation to minimize effect of startup transients                                                                                                                         | IQ demodulation and low pass filtering to extract magnitude and phase relationship of Z                                                                                   | Computer           | Panasonic NCR18650B Li-Ion NCA 3.4 Ah   | 25 mHz - 7.66 kHz | Comparison to results of a Gamry Reference 3000                          |
| Ferrero et al. [301]    | Frequency dependent moving average for down sampling, implemented in real time unit of processor; least square fitting in time domain to compensate for the linear drift of cell voltage                                                                                                                                                                                 | Estimation of Z from FFT data; averaging and calculation of standard deviation of Z; standard deviation is used as a measure of uncertainty /quality metric               | SBC                | 12 V 7 Ah Lead Acid                     | 98 mHz - 6.25 Hz  | –                                                                        |
| Gong et al. [290]       | Filtering of bitstream (from Delta-Sigma-Modulator) to extract DC-component and real and imaginary part of the AC-component; demodulator uses the excitation sine as reference for very narrow filter bandwidth, reducing interference from drive currents; offset and gain compensation using factory calibration data from OTP memory; compensation of die temperature | Impedance is estimated by an unspecified method                                                                                                                           | Computer           | 6s4p of pouch cells NMC 44 Ah           | 2 Hz - 2 kHz      | Comparison to results obtained with an oscilloscope                      |
| Hong et al. [303]       | Impedance is estimated by an unspecified FFT based technique                                                                                                                                                                                                                                                                                                             | Fitting of an ECM using Zview Test software                                                                                                                               | Computer           | 24s5p of LMO 35 Ah                      | 1 Hz - 1 kHz      | Comparison to theoretical results                                        |
| Howey et al. [207]      | Undefined windowing of time domain data; DFT of frequencies of interest                                                                                                                                                                                                                                                                                                  | PSD based estimation of Z; spectral coherence is used as a quality metric; compensation of passive filter networks in frequency domain                                    | Computer           | A123 Systems ANR26650M1A LFP 2.3 Ah     | 1 Hz - 2 kHz      | Comparison to results of a Bio-Logic VSP potentiostat                    |
| Koch et al. [299]       | –                                                                                                                                                                                                                                                                                                                                                                        | FFT based estimation of Z                                                                                                                                                 | Computer           | Samsung ICR18650-30A LCO/NCM 3 Ah       | 10 mHz - 5 kHz    | Comparison to results of a Digatron EISmeter                             |
| Liebhart et al. [112]   | Compensation of sampling delay between current and voltage; segmentation, windowing using Hamming function and FFT of all segments is computed                                                                                                                                                                                                                           | PSD based estimation of Z, averaging across segments; spectral coherence is used as a quality metric                                                                      | Computer           | 1s4p of Samsung INR18650-25R NMC 2.5 Ah | 10 Hz - 12.5 kHz  | Comparison to results of Zahner Zennium Pro; Lin-KK test is performed    |
| Lohmann et al. [307]    | Windowing & zero-padding for increased frequency resolution                                                                                                                                                                                                                                                                                                              | FFT based estimation of Z                                                                                                                                                 | Computer           | Prismatic LMO/NCM 20 Ah                 | 10 mHz - 1 kHz    | Lin-KK & comparison to results of EIS equipment                          |
| Moore et al. [302]      | –                                                                                                                                                                                                                                                                                                                                                                        | FFT based estimation of Z                                                                                                                                                 | Computer           | EIG20Ah C020 Pouch cell NCM 20 Ah       | 50 mHz - 2 kHz    | Comparison to data acquired with an electronic load as excitation source |
| Nguyen et al. [300]     | Phase and magnitude of response are extracted by a DLIA, estimation of Z in the DSP                                                                                                                                                                                                                                                                                      | ECM Parameters are estimated using complex nonlinear least squares method (Levenberg-Marquardt algorithm) applied to Z on the DSP                                         | DSP                | Delkor DF80L Lead Acid 12 V 80 Ah       | 0.1 Hz - 1 kHz    | Comparison to results of a Korea Kumho BPS instrument                    |
| Piret et al. [305]      | Band-stop filtering at 50 Hz and its odd multiples to remove mains interference                                                                                                                                                                                                                                                                                          | PSD based estimation of Z; spectral coherence is used as a quality metric; averaging by exponential average (IIR) is performed; forgetting factor is coupled to coherence | Computer           | 3s1p Battery pack LiPo 2.2 Ah           | 20 Hz - 90 Hz     | Comparison to results of a BioLogic VMP3                                 |
| Qahouq et al. [304]     | –                                                                                                                                                                                                                                                                                                                                                                        | Unspecified DFT based estimation of Z                                                                                                                                     | Computer           | Tenergy 30005-0 (18650) LCO 2.6 Ah      | 10 Hz - 9 kHz     | Comparison to results of a Keysight E4990A impedance analyzer            |
| Roscher et al. [310]    | Voltage data from each cell is collected by CECU; compensation of sampling delay between current and voltage                                                                                                                                                                                                                                                             | Estimation of Z by an undefined method on the CECU                                                                                                                        | MCU of CECU        | A123 Systems ANR26650M1-B LFP 2.5 Ah    | < 1 Hz - 1 kHz    | Comparison to results of a commercial impedance spectrometer             |

| Source                 | Preprocessing                                                                                                                                   | Postprocessing                                                                                                                                                                                              | Computation Device | Cell Type                                         | Frequency Range                                                                     | Validity Check                                                                                |
|------------------------|-------------------------------------------------------------------------------------------------------------------------------------------------|-------------------------------------------------------------------------------------------------------------------------------------------------------------------------------------------------------------|--------------------|---------------------------------------------------|-------------------------------------------------------------------------------------|-----------------------------------------------------------------------------------------------|
| Sihvo et al. [295]     | –                                                                                                                                               | Fourier based method for estimation of impedance (not further specified)                                                                                                                                    | Computer           | Battery pack NMC 36 V 2.6 Ah                      | (1) 0.1 Hz - 102.3 Hz for low freq. PRBS<br>(2) 11.7 Hz - 5 kHz for high freq. PRBS | Comparison to a reference EIS-measurement recorded with a network analyzer using a sine-sweep |
| Sockeel et al. [306]   | Windowing using Hamming function; PSD based estimation of Z; squared spectral coherence is used as a quality metric; exponential averaging of Z | Estimates coefficients of transfer function; partial fraction decomposition is performed; parameter estimation for multiple orders (RC) of the ECM; selects order with least RMSE for further investigation | Computer           | A123 Systems 7 × 15s2p of AMP201HD-A LFP 19.6 Ah  | < 10 Hz                                                                             | –                                                                                             |
| Wang et al. [154]      | –                                                                                                                                               | Extracts amplitude and phase of voltage and current from their respective min. and max. values for estimation of Z                                                                                          | MCU                | Undefined Prismatic LFP 8 Ah                      | 0.1 Hz - 200 Hz                                                                     | Comparison to results of a Solartron 1287/1255B & a Toyo Seiki PBi250-10                      |
| Wei et al. [311]       | DLIA to extract magnitude and phase of voltage signal                                                                                           | Relative impedance of cells is calculated to monitor consistency of the cells; estimation of Z on LECUs to reduce load on main BMS and CAN (current data is broadcasted to LECUs)                           | DSP of LECU        | Undefined Prismatic LFP 8 Ah                      | 0.1 Hz - 500 Hz                                                                     | Comparison to results of an unspecified electrochemical impedance workstation                 |
| Yokoshima et al. [320] | Segmentation with overlap                                                                                                                       | PSD based estimation of Z; calculation of moving average of Z                                                                                                                                               | Computer           | 11 kWh Energy storage system (240 cells in total) | 50 mHz - 2 kHz                                                                      | Comparison to a reference EIS-measurement                                                     |

**Abbreviations:** Z=Impedance; DFT=Discrete Fourier transform; FFT=Fast Fourier transform; PRBS=Pseudorandom binary sequence; CSR=Current sense resistor; MCU=Microcontroller unit; DSP=Digital signal processor; CECU=Central electronic control unit; LECU=Local electronic control unit; SBC=Single board computer; SCS=Single cell supervisor; FPGA=Field programmable gate array; HPF=High-pass filter; LPF=Low-pass filter; BPF=Band-pass filter; CIC=Cascaded integrator-comb; OTP=One time programmable; DLIA=Digital lock-in amplifier; GPIO=General-purpose input/output; PWM=Pulse-width modulation; CAN=Controller Area Network

**Author Contributions:** Conceptualization, L.K., J.K., and D.S.; Methodology, L.K., J.K., and D.S.; Writing—original draft preparation, L.K., T.B., S.D., M.E., C.H. (Christian Hanzl), C.H. (Christoph Hartmann), M.H. (Markus Hölzle), J.K., M.L., B.L., M.S., D.S., S.S., J.S., and C.T.; Writing—review and editing, L.K., T.B., S.D., M.E., C.H. (Christian Hanzl), C.H. (Christoph Hartmann), M.H. (Markus Hölzle), J.K., M.L., B.L., M.S., D.S., S.S., J.S., C.T., M.H. (Michael Hinterberger) and C.E.; Visualization, M.H. (Markus Hölzle) and J.K.; Supervision, L.K., M.H. (Michael Hinterberger), and C.E.; Project administration, L.K., M.H. (Michael Hinterberger), and C.E. All authors have read and agreed to the published version of the manuscript.

**Funding:** This research was funded by AUDI AG, 85057 Ingolstadt, Germany.

**Acknowledgments:** The authors express their gratitude to AUDI AG for their support over the past years and the good cooperation.

**Conflicts of Interest:** The authors declare no conflict of interest.

## References

1. Lu, L.; Han, X.; Li, J.; Hua, J.; Ouyang, M. A review on the key issues for lithium-ion battery management in electric vehicles. *J. Power Sources* **2013**, *226*, 272–288. doi:10.1016/j.jpowsour.2012.10.060.
2. Liu, X.; Ai, W.; Naylor Marlow, M.; Patel, Y.; Wu, B. The effect of cell-to-cell variations and thermal gradients on the performance and degradation of lithium-ion battery packs. *Appl. Energy* **2019**, *248*, 489–499. doi:10.1016/j.apenergy.2019.04.108.
3. Campestri, C.; Keil, P.; Schuster, S.F.; Jossen, A. Ageing of lithium-ion battery modules with dissipative balancing compared with single-cell ageing. *J. Energy Storage* **2016**, *6*, 142–152. doi:10.1016/j.est.2016.03.004.
4. Rumpf, K.; Rheinfeld, A.; Schindler, M.; Keil, J.; Schua, T.; Jossen, A. Influence of Cell-to-Cell Variations on the Inhomogeneity of Lithium-Ion Battery Modules. *J. Electrochem. Soc.* **2018**, *165*, A2587–A2607. doi:10.1149/2.0111811JES.
5. Hosseinzadeh, E.; Arias, S.; Krishna, M.; Worwood, D.; Barai, A.; Widanalage, D.; Marco, J. Quantifying cell-to-cell variations of a parallel battery module for different pack configurations. *Appl. Energy* **2021**, *282*, 115859. doi:10.1016/j.apenergy.2020.115859.
6. Paul, S.; Diegelmann, C.; Kabza, H.; Tillmetz, W. Analysis of ageing inhomogeneities in lithium-ion battery systems. *J. Power Sources* **2013**, *239*, 642–650. doi:10.1016/j.jpowsour.2013.01.068.
7. Saidani, F.; Hutter, F.X.; Selinger, W.; Yu, Z.; Burghartz, J.N. A lithium-ion battery demonstrator for HEV applications featuring a smart system at cell level. In Proceedings of the 2017 IEEE International Systems Engineering Symposium (ISSE), Vienna, Austria, 11–13 October 2017; pp. 1–5. doi:10.1109/SysEng.2017.8088249.
8. Schneider, D.; Liebhart, B.; Endisch, C. Active state and parameter estimation as part of intelligent battery systems. *J. Energy Storage* **2021**, *39*, 102638.
9. Lorentz, V.; Wenger, M.; Giegerich, M.; Zeltner, S.; März, M.; Frey, L. Smart Battery Cell Monitoring with Contactless Data Transmission. In *Advanced Microsystems for Automotive Applications 2012*; Meyer, G., Ed.; Springer: Berlin/Heidelberg, Germany, 2012.
10. Kim, T.; Qiao, W.; Qu, L. Series-connected reconfigurable multicell battery: A novel design towards smart batteries. In Proceedings of the 2010 IEEE Energy Conversion Congress and Exposition, Atlanta, GA, USA, 12–16 September 2010; pp. 4257–4263. doi:10.1109/ECCE.2010.5617723.
11. Canfield, D. Smart Battery with Integrated Sensing and Electronics. U.S. 20170092994 A1, 30 March 2017.
12. Butzmann, S. Battery Having a Plurality of Battery Cells and Method for Regulating a Battery Voltage of a Battery Using Switchon Probabilities of the Battery Cells. U.S. 9362760 B2, 7 June 2016.
13. Hinterberger, M.; Hellenthal, B. Smart Battery Cell of a Battery for a Motor Vehicle. U.S. 10361466B2, 23 July 2019.
14. Hinterberger, M.; Hellenthal, B. Battery Cell for a Battery of a Motor Vehicle, Battery, and Motor Vehicle. CN 107210418 B, 26 September 2017.
15. Wei, Z.; Zhao, J.; He, H.; Ding, G.; Cui, H.; Liu, L. Future smart battery and management: Advanced sensing from external to embedded multi-dimensional measurement. *J. Power Sources* **2021**, *489*, 229462. doi:10.1016/j.jpowsour.2021.229462.
16. Xia, G.; Cao, L.; Bi, G. A review on battery thermal management in electric vehicle application. *J. Power Sources* **2017**, *367*, 90–105. doi:10.1016/j.jpowsour.2017.09.046.
17. Wu, C.; Zhu, C.; Ge, Y.; Zhao, Y. A Review on Fault Mechanism and Diagnosis Approach for Li-Ion Batteries. *J. Nanomater.* **2015**, *2015*, 1–9. doi:10.1155/2015/631263.
18. Shen, M.; Gao, Q. A review on battery management system from the modeling efforts to its multiapplication and integration. *Int. J. Energy Res.* **2019**, *43*, 5042–5075. doi:10.1002/er.4433.
19. Kim, I.S. A Technique for Estimating the State of Health of Lithium Batteries Through a Dual-Sliding-Mode Observer. *IEEE Trans. Power Electron.* **2010**, *25*, 1013–1022. doi:10.1109/TPEL.2009.2034966.
20. Dixon, J.; Pereda, J.; Castillo, C.; Bosch, S. Asymmetrical Multilevel Inverter for Traction Drives Using Only One DC Supply. *IEEE Trans. Veh. Technol.* **2010**, *59*, 3736–3743. doi:10.1109/TVT.2010.2057268.

21. Waag, W.; Fleischer, C.; Sauer, D.U. Critical review of the methods for monitoring of lithium-ion batteries in electric and hybrid vehicles. *J. Power Sources* **2014**, *258*, 321–339. doi:10.1016/j.jpowsour.2014.02.064.
22. Lipu, M.H.; Hannan, M.A.; Hussain, A.; Hoque, M.M.; Ker, P.J.; Saad, M.; Ayob, A. A review of state of health and remaining useful life estimation methods for lithium-ion battery in electric vehicles: Challenges and recommendations. *J. Clean. Prod.* **2018**, *205*, 115–133. doi:10.1016/j.jclepro.2018.09.065.
23. Ripka, P. Electric current sensors: A review. *Meas. Sci. Technol.* **2010**, *21*, 112001. doi:10.1088/0957-0233/21/11/112001.
24. Lyu, D.; Ren, B.; Li, S. Failure modes and mechanisms for rechargeable Lithium-based batteries: A state-of-the-art review. *Acta Mech.* **2019**, *230*, 701–727. doi:10.1007/s00707-018-2327-8.
25. Tran, M.K.; Fowler, M. Sensor Fault Detection and Isolation for Degrading Lithium-Ion Batteries in Electric Vehicles Using Parameter Estimation with Recursive Least Squares. *Batteries* **2020**, *6*, 1. doi:10.3390/batteries6010001.
26. Hu, X.; Jiang, Z.; Yan, L.; Yang, G.; Xie, J.; Liu, S.; Zhang, Q.; Xiang, Y.; Min, H.; Peng, X. Real-time visualized battery health monitoring sensor with piezoelectric/pyroelectric poly (vinylidene fluoride-trifluoroethylene) and thin film transistor array by in-situ poling. *J. Power Sources* **2020**, *467*, 228367. doi:10.1016/j.jpowsour.2020.228367.
27. Wang, H.; Simunovic, S.; Maleki, H.; Howard, J.N.; Hallmark, J.A. Internal configuration of prismatic lithium-ion cells at the onset of mechanically induced short circuit. *J. Power Sources* **2016**, *306*, 424–430. doi:10.1016/j.jpowsour.2015.12.026.
28. Diao, W.; Xing, Y.; Saxena, S.; Pecht, M. Evaluation of Present Accelerated Temperature Testing and Modeling of Batteries. *Appl. Sci.* **2018**, *8*, 1786. doi:10.3390/app8101786.
29. Xiong, R.; Yu, Q.; Shen, W. Review on sensors fault diagnosis and fault-tolerant techniques for lithium ion batteries in electric vehicles. In Proceedings of the 2018 13th IEEE Conference on Industrial Electronics and Applications (ICIEA), Wuhan, China, 31 May–2 June 2018; pp. 406–410. doi:10.1109/ICIEA.2018.8397751.
30. Yao, L.; Wang, Z.; Ma, J. Fault detection of the connection of lithium-ion power batteries based on entropy for electric vehicles. *J. Power Sources* **2015**, *293*, 548–561. doi:10.1016/j.jpowsour.2015.05.090.
31. Offer, G.J.; Yufit, V.; Howey, D.A.; Wu, B.; Brandon, N.P. Module design and fault diagnosis in electric vehicle batteries. *J. Power Sources* **2012**, *206*, 383–392. doi:10.1016/j.jpowsour.2012.01.087.
32. Schmid, M.; Gebauer, E.; Hanzl, C.; Endisch, C. Active Model-Based Fault Diagnosis in Reconfigurable Battery Systems. *IEEE Trans. Power Electron.* **2021**, *36*, 2584–2597. doi:10.1109/TPEL.2020.3012964.
33. Lombardi, W.; Zarudniev, M.; Lesecq, S.; Bacquet, S. Sensors fault diagnosis for a BMS. In Proceedings of the 2014 European Control Conference (ECC 2014), Strasbourg, France, 24–27 June 2014; IEEE: Piscataway, NJ, USA, 2014; pp. 952–957. doi:10.1109/ECC.2014.6862432.
34. Schmid, M.; Gebauer, E.; Endisch, C. Structural Analysis in Reconfigurable Battery Systems for Active Fault Diagnosis. *IEEE Trans. Power Electron.* **2021**, *36*, 8672–8684. doi:10.1109/TPEL.2021.3049573.
35. Xia, B.; Mi, C. A fault-tolerant voltage measurement method for series connected battery packs. *J. Power Sources* **2016**, *308*, 83–96. doi:10.1016/j.jpowsour.2016.01.057.
36. Xia, B.; Nguyen, T.; Yang, J.; Mi, C. The improved interleaved voltage measurement method for series connected battery packs. *J. Power Sources* **2016**, *334*, 12–22. doi:10.1016/j.jpowsour.2016.09.167.
37. Kang, Y.; Duan, B.; Zhou, Z.; Shang, Y.; Zhang, C. A multi-fault diagnostic method based on an interleaved voltage measurement topology for series connected battery packs. *J. Power Sources* **2019**, *417*, 132–144. doi:10.1016/j.jpowsour.2019.01.058.
38. Schmid, M.; Kneidinger, H.G.; Endisch, C. Data-Driven Fault Diagnosis in Battery Systems through Cross-Cell Monitoring. *IEEE Sensors J.* **2020**, *21*, 1829–1837. doi:10.1109/JSEN.2020.3017812.
39. Schmid, M.; Liebhart, B.; Kleiner, J.; Endisch, C.; Kennel, R. Online Detection of Soft Internal Short Circuits in Lithium-Ion Battery Packs by Data-Driven Cell Voltage Monitoring. In Proceedings of the 2021 IEEE International Conference on Electrical and Electromechanical Energy Conversion (ECCE Asia), Singapore, 24–27 May 2021; pp. 1711–1718. doi:10.1109/ECCE-Asia49820.2021.9479175.
40. Dubarry, M.; Truchot, C.; Liaw, B.Y. Cell degradation in commercial LiFePO<sub>4</sub> cells with high-power and high-energy designs. *J. Power Sources* **2014**, *258*, 408–419. doi:10.1016/j.jpowsour.2014.02.052.
41. Dubarry, M.; Liaw, B.Y. Identify capacity fading mechanism in a commercial LiFePO<sub>4</sub> cell. *J. Power Sources* **2009**, *194*, 541–549. doi:10.1016/j.jpowsour.2009.05.036.
42. Bloom, I.; Christophersen, J.; Gering, K. Differential voltage analyses of high-power lithium-ion cells. *J. Power Sources* **2005**, *139*, 304–313. doi:10.1016/j.jpowsour.2004.07.022.
43. Singh, A.; Izadian, A.; Anwar, S. Fault diagnosis of Li-Ion batteries using multiple-model adaptive estimation. In Proceedings of the 39th annual conference of the IEEE Industrial Electronics Society, Vienna, Austria, 10–13 November 2013; pp. 3524–3529. doi:10.1109/IECON.2013.6699695.
44. Sidhu, A.; Izadian, A.; Anwar, S. Adaptive Nonlinear Model-Based Fault Diagnosis of Li-Ion Batteries. *IEEE Trans. Ind. Electron.* **2015**, *62*, 1002–1011. doi:10.1109/TIE.2014.2336599.
45. Alavi, S.M.M.; Samadi, M.F.; Saif, M. Plating Mechanism Detection in Lithium-ion batteries, by using a particle-filtering based estimation technique. In Proceedings of the 2013 American Control Conference (ACC 2013), Washington, DC, USA, 17–19 June 2013; IEEE: Piscataway, NJ, USA, 2013; pp. 4356–4361. doi:10.1109/ACC.2013.6580510.
46. Tian, J.; Wang, Y.; Chen, Z. Sensor fault diagnosis for lithium-ion battery packs based on thermal and electrical models. *Int. J. Electr. Power Energy Syst.* **2020**, *121*, 106087. doi:10.1016/j.jepes.2020.106087.

47. Zheng, C.; Chen, Z.; Huang, D. Fault diagnosis of voltage sensor and current sensor for lithium-ion battery pack using hybrid system modeling and unscented particle filter. *Energy* **2020**, *191*, 116504. doi:10.1016/j.energy.2019.116504.
48. Lin, T.; Chen, Z.; Zheng, C.; Huang, D.; Zhou, S. Fault diagnosis of lithium-ion battery pack based on hybrid system and dual extended Kalman filter algorithm. *IEEE Trans. Transp. Electrification* **2020**, *7*, 26–36. doi:10.1109/TTE.2020.3006064.
49. Xiong, R.; Yu, Q.; Shen, W.; Lin, C.; Sun, F. A Sensor Fault Diagnosis Method for a Lithium-Ion Battery Pack in Electric Vehicles. *IEEE Trans. Power Electron.* **2019**, *34*, 9709–9718. doi:10.1109/TPEL.2019.2893622.
50. Liu, Z.; He, H. Sensor fault detection and isolation for a lithium-ion battery pack in electric vehicles using adaptive extended Kalman filter. *Appl. Energy* **2017**, *185*, 2033–2044. doi:10.1016/j.apenergy.2015.10.168.
51. Liu, Z.; Ahmed, Q.; Zhang, J.; Rizzoni, G.; He, H. Structural analysis based sensors fault detection and isolation of cylindrical lithium-ion batteries in automotive applications. *Control Eng. Pract.* **2016**, *52*, 46–58. doi:10.1016/j.conengprac.2016.03.015.
52. Liu, Z.; He, H. Model-based Sensor Fault Diagnosis of a Lithium-ion Battery in Electric Vehicles. *Energies* **2015**, *8*, 6509–6527. doi:10.3390/en8076509.
53. He, H.; Liu, Z.; Hua, Y. Adaptive Extended Kalman Filter Based Fault Detection and Isolation for a Lithium-Ion Battery Pack. *Energy Procedia* **2015**, *75*, 1950–1955. doi:10.1016/j.egypro.2015.07.230.
54. Gadsden, S.A.; Habibi, S.R. Model-based fault detection of a battery system in a hybrid electric vehicle. In Proceedings of the IEEE Vehicle Power and Propulsion Conference 2011, Chicago, IL, USA, 6–9 September 2011; pp. 1–6. doi:10.1109/VPPC.2011.6043175.
55. Dey, S.; Biron, Z.A.; Tatipamula, S.; Das, N.; Mohon, S.; Ayalew, B.; Pisu, P. On-board Thermal Fault Diagnosis of Lithium-ion Batteries For Hybrid Electric Vehicle Application. *IFAC-PapersOnLine* **2015**, *48*, 389–394. doi:10.1016/j.ifacol.2015.10.056.
56. Dey, S.; Biron, Z.A.; Tatipamula, S.; Das, N.; Mohon, S.; Ayalew, B.; Pisu, P. Model-based real-time thermal fault diagnosis of Lithium-ion batteries. *Control Eng. Pract.* **2016**, *56*, 37–48. doi:10.1016/j.conengprac.2016.08.002.
57. Dey, S.; Perez, H.E.; Moura, S.J. Model-Based Battery Thermal Fault Diagnostics: Algorithms, Analysis, and Experiments. *IEEE Trans. Control Syst. Technol.* **2019**, *27*, 576–587. doi:10.1109/TCST.2017.2776218.
58. Xu, J.; Wang, J.; Li, S.; Cao, B. A Method to Simultaneously Detect the Current Sensor Fault and Estimate the State of Energy for Batteries in Electric Vehicles. *Sensors* **2016**, *16*, 1328. doi:10.3390/s16081328.
59. Dey, S.; Mohon, S.; Pisu, P.; Ayalew, B. Sensor Fault Detection, Isolation, and Estimation in Lithium-Ion Batteries. *IEEE Trans. Control Syst. Technol.* **2016**, *24*, 2141–2149. doi:10.1109/TCST.2016.2538200.
60. Zhang, H.; Pei, L.; Sun, J.; Song, K.; Lu, R.; Zhao, Y.; Zhu, C.; Wang, T. Online Diagnosis for the Capacity Fade Fault of a Parallel-Connected Lithium Ion Battery Group. *Energies* **2016**, *9*, 387. doi:10.3390/en9050387.
61. Marcicki, J.; Onori, S.; Rizzoni, G. Nonlinear Fault Detection and Isolation for a Lithium-Ion Battery Management System. In Proceedings of the ASME 2010 Dynamic Systems and Control Conference, Cambridge, MA, USA, 12–15 September 2010; ASME: New York, NY, USA, 2010; pp. 607–614. doi:10.1115/DSCC2010-4085.
62. Liu, Z.; He, H.; Ahmed, Q.; Rizzoni, G. Structural Analysis Based Fault Detection and Isolation Applied for A Lithium-Ion Battery Pack. *IFAC-PapersOnLine* **2015**, *48*, 1465–1470. doi:10.1016/j.ifacol.2015.09.731.
63. Liu, Z.; Ahmed, Q.; Rizzoni, G.; He, H. Fault Detection and Isolation for Lithium-Ion Battery System Using Structural Analysis and Sequential Residual Generation. In Proceedings of the ASME 2014 Dynamic Systems and Control Conference, DSCC 2014, San Antonio, TX, USA, 22–24 October 2014; Volume 2. doi:10.1115/DSCC2014-6101.
64. Shang, Y.; Lu, G.; Kang, Y.; Zhou, Z.; Duan, B.; Zhang, C. A multi-fault diagnosis method based on modified Sample Entropy for lithium-ion battery strings. *J. Power Sources* **2020**, *446*, 227275. doi:10.1016/j.jpowsour.2019.227275.
65. Ma, M.; Wang, Y.; Duan, Q.; Wu, T.; Sun, J.; Wang, Q. Fault detection of the connection of lithium-ion power batteries in series for electric vehicles based on statistical analysis. *Energy* **2018**, *164*, 745–756. doi:10.1016/j.energy.2018.09.047.
66. Sun, Z.; Liu, P.; Wang, Z. Real-time Fault Diagnosis Method of Battery System Based on Shannon Entropy. *Energy Procedia* **2017**, *105*, 2354–2359. doi:10.1016/j.egypro.2017.03.676.
67. Zheng, Y.; Han, X.; Lu, L.; Li, J.; Ouyang, M. Lithium ion battery pack power fade fault identification based on Shannon entropy in electric vehicles. *J. Power Sources* **2013**, *223*, 136–146. doi:10.1016/j.jpowsour.2012.09.015.
68. Yao, L.; Fang, Z.; Xiao, Y.; Hou, J.; Fu, Z. An Intelligent Fault Diagnosis Method for Lithium Battery Systems Based on Grid Search Support Vector Machine. *Energy* **2021**, *214*, 118866. doi:10.1016/j.energy.2020.118866.
69. Lai, X.; Yi, W.; Kong, X.; Han, X.; Zhou, L.; Sun, T.; Zheng, Y. Online detection of early stage internal short circuits in series-connected lithium-ion battery packs based on state-of-charge correlation. *J. Energy Storage* **2020**, *30*, 101514. doi:10.1016/j.est.2020.101514.
70. Gao, W.; Zheng, Y.; Ouyang, M.; Li, J.; Lai, X.; Hu, X. Micro-Short-Circuit Diagnosis for Series-Connected Lithium-Ion Battery Packs Using Mean-Difference Model. *IEEE Trans. Ind. Electron.* **2019**, *66*, 2132–2142. doi:10.1109/TIE.2018.2838109.
71. Feng, X.; Pan, Y.; He, X.; Wang, L.; Ouyang, M. Detecting the internal short circuit in large-format lithium-ion battery using model-based fault-diagnosis algorithm. *J. Energy Storage* **2018**, *18*, 26–39. doi:10.1016/j.est.2018.04.020.
72. Chen, W.; Chen, W.T.; Saif, M.; Li, M.F.; Wu, H. Simultaneous Fault Isolation and Estimation of Lithium-Ion Batteries via Synthesized Design of Luenberger and Learning Observers. *IEEE Trans. Control Syst. Technol.* **2014**, *22*, 290–298. doi:10.1109/TCST.2013.2239296.
73. Xu, J.; Wang, H.; Shi, H.; Mei, X. Multi-scale short circuit resistance estimation method for series connected battery strings. *Energy* **2020**, *202*, 117647. doi:10.1016/j.energy.2020.117647.



74. Meng, J.; Boukhni, M.; Delpha, C.; Diallo, D. Incipient short-circuit fault diagnosis of lithium-ion batteries. *J. Energy Storage* **2020**, *31*, 101658. doi:10.1016/j.est.2020.101658.
75. Seo, M.; Park, M.; Song, Y.; Kim, S.W. Online Detection of Soft Internal Short Circuit in Lithium-Ion Batteries at Various Standard Charging Ranges. *IEEE Access* **2020**, *8*, 70947–70959. doi:10.1109/ACCESS.2020.2987363.
76. Seo, M.; Goh, T.; Park, M.; Koo, G.; Kim, S. Detection of Internal Short Circuit in Lithium Ion Battery Using Model-Based Switching Model Method. *Energies* **2017**, *10*, 76. doi:10.3390/en10010076.
77. Feng, X.; Weng, C.; Ouyang, M.; Sun, J. Online internal short circuit detection for a large format lithium ion battery. *Appl. Energy* **2016**, *161*, 168–180. doi:10.1016/j.apenergy.2015.10.019.
78. Ouyang, M.; Zhang, M.; Feng, X.; Lu, L.; Li, J.; He, X.; Zheng, Y. Internal short circuit detection for battery pack using equivalent parameter and consistency method. *J. Power Sources* **2015**, *294*, 272–283. doi:10.1016/j.jpowsour.2015.06.087.
79. Kong, X.; Zheng, Y.; Ouyang, M.; Lu, L.; Li, J.; Zhang, Z. Fault diagnosis and quantitative analysis of micro-short circuits for lithium-ion batteries in battery packs. *J. Power Sources* **2018**, *395*, 358–368. doi:10.1016/j.jpowsour.2018.05.097.
80. Kim, J.; Cho, B.H. An innovative approach for characteristic analysis and state-of-health diagnosis for a Li-ion cell based on the discrete wavelet transform. *J. Power Sources* **2014**, *260*, 115–130. doi:10.1016/j.jpowsour.2014.02.100.
81. Xia, B.; Shang, Y.; Nguyen, T.; Mi, C. A correlation based fault detection method for short circuits in battery packs. *J. Power Sources* **2017**, *337*, 1–10. doi:10.1016/j.jpowsour.2016.11.007.
82. Li, X.; Wang, Z. A novel fault diagnosis method for lithium-ion battery packs of electric vehicles. *Measurement* **2018**, *116*, 402–411. doi:10.1016/j.measurement.2017.11.034.
83. Liu, P.; Sun, Z.; Wang, Z.; Zhang, J. Entropy-Based Voltage Fault Diagnosis of Battery Systems for Electric Vehicles. *Energies* **2018**, *11*, 136. doi:10.3390/en11010136.
84. Wang, Z.; Hong, J.; Liu, P.; Zhang, L. Voltage fault diagnosis and prognosis of battery systems based on entropy and Z-score for electric vehicles. *Appl. Energy* **2017**, *196*, 289–302. doi:10.1016/j.apenergy.2016.12.143.
85. Zheng, Y.; Lu, Y.; Gao, W.; Han, X.; Feng, X.; Ouyang, M. Micro-Short-Circuit Cell Fault Identification Method for Lithium-ion Battery Packs Based on the Mutual Information. *IEEE Trans. Ind. Electron.* **2020**, *68*, 4373–4381. doi:10.1109/TIE.2020.2984441.
86. Hong, J.; Wang, Z.; Liu, P. Big-Data-Based Thermal Runaway Prognosis of Battery Systems for Electric Vehicles. *Energies* **2017**, *10*, 919. doi:10.3390/en10070919.
87. Xue, Q.; Li, G.; Zhang, Y.; Shen, S.; Chen, Z.; Liu, Y. Fault diagnosis and abnormality detection of lithium-ion battery packs based on statistical distribution. *J. Power Sources* **2021**, *482*, 228964. doi:10.1016/j.jpowsour.2020.228964.
88. Diao, W.; Naqvi, I.H.; Pecht, M. Early detection of anomalous degradation behavior in lithium-ion batteries. *J. Energy Storage* **2020**, *32*, 101710. doi:10.1016/j.est.2020.101710.
89. Haider, S.N.; Zhao, Q.; Li, X. Data driven battery anomaly detection based on shape based clustering for the data centers class. *J. Energy Storage* **2020**, *29*, 101479. doi:10.1016/j.est.2020.101479.
90. Da Li.; Zhang, Z.; Liu, P.; Wang, Z.; Zhang, L. Battery Fault Diagnosis for Electric Vehicles Based on Voltage Abnormality by Combining the Long Short-Term Memory Neural Network and the Equivalent Circuit Model. *IEEE Trans. Power Electron.* **2021**, *36*, 1303–1315. doi:10.1109/TPEL.2020.3008194.
91. Ojo, O.; Lang, H.; Kim, Y.; Hu, X.; Mu, B.; Lin, X. A Neural Network-Based Method for Thermal Fault Detection in Lithium-Ion Batteries. *IEEE Trans. Ind. Electron.* **2020**, *68*, 4068–4078. doi:10.1109/TIE.2020.2984980.
92. Xiong, J.; Banvait, H.; Li Lingxi.; Chen, Y.; Xie, J.; Liu, Y.; Wu, M.; Chen, J. Failure detection for over-discharged Li-ion batteries. In Proceedings of the 2012 IEEE International Electric Vehicle Conference, Greenville, SC, USA, 4–8 March 2012; pp. 1–5. doi:10.1109/IEVC.2012.6183238.
93. Gao, W.; Li, X.; Ma, M.; Fu, Y.; Jiang, J.; Mi, C. Case Study of an Electric Vehicle Battery Thermal Runaway and Online Internal Short Circuit Detection. *IEEE Trans. Power Electron.* **2020**, *36*, 2452–2455. doi:10.1109/TPEL.2020.3013191.
94. Xia, B.; Chen, Z.; Mi, C.; Robert, B. External short circuit fault diagnosis for lithium-ion batteries. In Proceedings of the IEEE Transportation Electrification Conference and Expo (ITEC), Dearborn, MI, USA, 15–18 June 2014; IEEE: Piscataway, NJ, USA, 2014; pp. 1–7. doi:10.1109/ITEC.2014.6861806.
95. Muddappa, V.K.S.; Anwar, S. Electrochemical Model Based Fault Diagnosis of Li-Ion Battery Using Fuzzy Logic. In Proceedings of the ASME International Mechanical Engineering Congress and Exposition, Montreal, QC, Canada, 14–20 November 2014; ASME: New York, NY, USA, 2015. doi:10.1115/IMECE2014-37134.
96. Kaypmaz, T.C.; Tuncay, R.N. An advanced cell model for diagnosing faults in operation of Li-ion Polymer batteries. In Proceedings of the IEEE Vehicle Power and Propulsion Conference (VPPC), Chicago, IL, USA, 6–9 September 2011; IEEE: Piscataway, NJ, USA, 2011; pp. 1–5. doi:10.1109/VPPC.2011.6043007.
97. Yang, R.; Xiong, R.; He, H.; Chen, Z. A fractional-order model-based battery external short circuit fault diagnosis approach for all-climate electric vehicles application. *J. Clean. Prod.* **2018**, *187*, 950–959. doi:10.1016/j.jclepro.2018.03.259.
98. Zhao, Y.; Liu, P.; Wang, Z.; Zhang, L.; Hong, J. Fault and defect diagnosis of battery for electric vehicles based on big data analysis methods. *Appl. Energy* **2017**, *207*, 354–362. doi:10.1016/j.apenergy.2017.05.139.
99. Schmid, M.; Vögele, U.; Endisch, C. A novel matrix-vector-based framework for modeling and simulation of electric vehicle battery packs. *J. Energy Storage* **2020**, *32*, 101736. doi:10.1016/j.est.2020.101736.
100. Xiong, R.; Sun, F.; Chen, Z.; He, H. A data-driven multi-scale extended Kalman filtering based parameter and state estimation approach of lithium-ion polymer battery in electric vehicles. *Appl. Energy* **2014**, *113*, 463–476. doi:10.1016/j.apenergy.2013.07.061.

101. Wang, Q.; Kang, J.; Tan, Z.; Luo, M. An online method to simultaneously identify the parameters and estimate states for lithium ion batteries. *Electrochim. Acta* **2018**, *289*, 376–388. doi:10.1016/j.electacta.2018.08.076.
102. Wei, Z.; Zhao, J.; Zou, C.; Lim, T.M.; Tseng, K.J. Comparative study of methods for integrated model identification and state of charge estimation of lithium-ion battery. *J. Power Sources* **2018**, *402*, 189–197. doi:10.1016/j.jpowsour.2018.09.034.
103. Wang, Y.; Zhao, L.; Cheng, J.; Zhou, J.; Wang, S. A State of Charge Estimation Method of Lithium-Ion Battery Based on Fused Open Circuit Voltage Curve. *Appl. Sci.* **2020**, *10*, 1264. doi:10.3390/app10041264.
104. Meng, J.; Boukhni, M.; Diallo, D.; Wang, T. A New Cascaded Framework for Lithium-Ion Battery State and Parameter Estimation. *Appl. Sci.* **2020**, *10*, 1009. doi:10.3390/app10031009.
105. Dai, H.; Wei, X.; Sun, Z. Recursive Parameter Identification of Lithium-Ion Battery for EVs Based on Equivalent Circuit Model. *J. Comput. Theor. Nanosci.* **2013**, *10*, 2813–2818. doi:10.1166/jctn.2013.3283.
106. Xia, J.; Dai, H.; Sun, Z.; Venturi, M. Parameter Identification of Battery Pack Considering Cell Inconsistency. In Proceedings of the SAE World Congress Experience 2017, Detroit, MI, USA, 4–6 April 2017. doi:10.4271/2017-01-1214.
107. Wen, F.; Duan, B.; Zhang, C.; Zhu, R.; Shang, Y.; Zhang, J. High-Accuracy Parameter Identification Method for Equivalent-Circuit Models of Lithium-Ion Batteries Based on the Stochastic Theory Response Reconstruction. *Electronics* **2019**, *8*, 834. doi:10.3390/electronics8080834.
108. Wei, Z.; Zou, C.; Leng, F.; Soong, B.H.; Tseng, K.J. Online Model Identification and State-of-Charge Estimate for Lithium-Ion Battery With a Recursive Total Least Squares-Based Observer. *IEEE Trans. Ind. Electron.* **2018**, *65*, 1336–1346. doi:10.1109/TIE.2017.2736480.
109. Chiang, Y.H.; Sean, W.Y.; Ke, J.C. Online estimation of internal resistance and open-circuit voltage of lithium-ion batteries in electric vehicles. *J. Power Sources* **2011**, *196*, 3921–3932. doi:10.1016/j.jpowsour.2011.01.005.
110. Ali, M.U.; Zafar, A.; Nengroo, S.H.; Hussain, S.; Kim, H.J. Effect of Sensors Sensitivity on Lithium-Ion Battery Modeled Parameters and State of Charge: A Comparative Study: state of charge (SOC); sensitivity analysis; current sensor precision; voltage sensor precision. *Electronics* **2019**, *8*, 709. doi:10.3390/electronics8060709.
111. Pang, H.; Zhang, F. Experimental Data-Driven Parameter Identification and State of Charge Estimation for a Li-Ion Battery Equivalent Circuit Model. *Energies* **2018**, *11*, 1033. doi:10.3390/en11051033.
112. Liebhart, B.; Komsiyiska, L.; Endisch, C. Passive impedance spectroscopy for monitoring lithium-ion battery cells during vehicle operation. *J. Power Sources* **2020**, *449*, 227297. doi:10.1016/j.jpowsour.2019.227297.
113. Troxler, Y.; Wu, B.; Marinescu, M.; Yufit, V.; Patel, Y.; Marquis, A.J.; Brandon, N.P.; Offer, G.J. The effect of thermal gradients on the performance of lithium-ion batteries. *J. Power Sources* **2014**, *247*, 1018–1025. doi:10.1016/j.jpowsour.2013.06.084.
114. Arora, S.; Shen, W.; Kapoor, A. Neural network based computational model for estimation of heat generation in LiFePO<sub>4</sub> pouch cells of different nominal capacities. *Comput. Chem. Eng.* **2017**, *101*, 81–94. doi:10.1016/j.compchemeng.2017.02.044.
115. Cui, X.; Zeng, J.; Zhang, H.; Yang, J.; Qiao, J.; Li, J.; Li, W. Optimization of the lumped parameter thermal model for hard-cased li-ion batteries. *J. Energy Storage* **2020**, *32*, 101758. doi:10.1016/j.est.2020.101758.
116. Lundgren, H.; Svens, P.; Ekström, H.; Tengstedt, C.; Lindström, J.; Behm, M.; Lindbergh, G. Thermal Management of Large-Format Prismatic Lithium-Ion Battery in PHEV Application. *J. Electrochem. Soc.* **2016**, *163*, A309–A317. doi:10.1149/2.09411602jes.
117. Kleiner, J.; Komsiyiska, L.; Elger, G.; Endisch, C. Thermal Modelling of a Prismatic Lithium-Ion Cell in a Battery Electric Vehicle Environment: Influences of the Experimental Validation Setup. *Energies* **2020**, *13*, 62. doi:10.3390/en13010062.
118. Baumann, M.; Rohr, S.; Lienkamp, M. Cloud-connected battery management for decision-making on second-life of electric vehicle batteries. In Proceedings of the 2018 Thirteenth International Conference, Monte Carlo, Monaco, 10–12 April 2018; pp. 1–6. doi:10.1109/EVER.2018.8362355.
119. Jiang, J.; Ruan, H.; Sun, B.; Zhang, W.; Gao, W.; Le Wang, Y.; Zhang, L. A reduced low-temperature electro-thermal coupled model for lithium-ion batteries. *Appl. Energy* **2016**, *177*, 804–816. doi:10.1016/j.apenergy.2016.05.153.
120. Richardson, R.R.; Ireland, P.T.; Howey, D.A. Battery internal temperature estimation by combined impedance and surface temperature measurement. *J. Power Sources* **2014**, *265*, 254–261. doi:10.1016/j.jpowsour.2014.04.129.
121. Richardson, R.R.; Zhao, S.; Howey, D.A. On-board monitoring of 2D spatially-resolved temperatures in cylindrical lithium-ion batteries: Part I. Low-order thermal modelling. *J. Power Sources* **2016**, *326*, 377–388. doi:10.1016/j.jpowsour.2016.06.103.
122. Forgez, C.; Vinh Do, D.; Friedrich, G.; Morcrette, M.; Delacourt, C. Thermal modeling of a cylindrical LiFePO<sub>4</sub>/graphite lithium-ion battery. *J. Power Sources* **2010**, *195*, 2961–2968. doi:10.1016/j.jpowsour.2009.10.105.
123. Damay, N.; Forgez, C.; Bichat, M.P.; Friedrich, G. Thermal modeling of large prismatic LiFePO<sub>4</sub> /graphite battery. Coupled thermal and heat generation models for characterization and simulation. *J. Power Sources* **2015**, *283*, 37–45. doi:10.1016/j.jpowsour.2015.02.091.
124. Zhao, Y.; Patel, Y.; Zhang, T.; Offer, G.J. Modeling the Effects of Thermal Gradients Induced by Tab and Surface Cooling on Lithium Ion Cell Performance. *J. Electrochem. Soc.* **2018**, *165*, A3169–A3178. doi:10.1149/2.0901813jes.
125. Li, Y.; Chen, J.; Lan, F. Enhanced online model identification and state of charge estimation for lithium-ion battery under noise corrupted measurements by bias compensation recursive least squares. *J. Power Sources* **2020**, *456*, 227984. doi:10.1016/j.jpowsour.2020.227984.
126. Liu, Z.; Du, J.; Stimming, U.; Wang, Y. Adaptive observer design for the cell temperature estimation in battery packs in electric vehicles. In Proceedings of the 2014 IEEE 9th Conference on Industrial Electronics and Applications (ICIEA 2014), Hangzhou, China, 9–11 June 2014; IEEE: Piscataway, NJ, USA, 2014; pp. 348–353. doi:10.1109/ICIEA.2014.6931186.

127. Lin, X.; Fu, H.; Perez, H.E.; Siege, J.B.; Stefanopoulou, A.G.; Ding, Y.; Castanier, M.P. Parameterization and Observability Analysis of Scalable Battery Clusters for Onboard Thermal Management. *Oil Gas Sci. Technol.—Rev. D’Ifp Energies Nouv.* **2013**, *68*, 165–178. doi:10.2516/ogst/2012075.
128. Kleiner, J.; Komsiyyska, L.; Elger, G.; Endisch, C. Real-time core temperature prediction of prismatic automotive li-ion battery cells based on artificial neural networks. *J. Energy Storage* **2021**. doi:10.1016/j.est.2021.102588.
129. Kleiner, J.; Komsiyyska, L.; Elger, G.; Endisch, C. Advanced thermal state monitoring and temperature prediction in electric vehicles by physical-based and data-driven modeling of intelligent battery cells. *Batteries* **2021**, *7*, 31. doi:10.3390/batteries1010005.
130. Panchal, S.; Dincer, I.; Agelin-Chaab, M.; Fraser, R.; Fowler, M. Thermal modeling and validation of temperature distributions in a prismatic lithium-ion battery at different discharge rates and varying boundary conditions. *Appl. Therm. Eng.* **2016**, *96*, 190–199. doi:10.1016/j.applthermaleng.2015.11.019.
131. Panchal, S.; Mathew, M.; Dincer, I.; Agelin-Chaab, M.; Fraser, R.; Fowler, M. Thermal and electrical performance assessments of lithium-ion battery modules for an electric vehicle under actual drive cycles. *Electr. Power Syst. Res.* **2018**, *163*, 18–27. doi:10.1016/j.epsr.2018.05.020.
132. Hussein, A.A.; Chehade, A.A. Robust Artificial Neural Network-Based Models for Accurate Surface Temperature Estimation of Batteries. *IEEE Trans. Ind. Appl.* **2020**, *56*, 5269–5278. doi:10.1109/TIA.2020.3001256.
133. Srinivasan, R.; Carkhuff, B.G.; Butler, M.H.; Baisden, A.C. Instantaneous measurement of the internal temperature in lithium-ion rechargeable cells. *Electrochim. Acta* **2011**, *56*, 6198–6204. doi:10.1016/j.electacta.2011.03.136.
134. Raijmakers, L.; Danilov, D.L.; Eichel, R.A.; Notten, P. A review on various temperature-indication methods for Li-ion batteries. *Appl. Energy* **2019**, *240*, 918–945.
135. Richardson, R.R.; Howey, D.A. Sensorless Battery Internal Temperature Estimation Using a Kalman Filter With Impedance Measurement. *IEEE Trans. Sustain. Energy* **2015**, *6*, 1190–1199. doi:10.1109/TSTE.2015.2420375.
136. Srinivasan, R. Monitoring dynamic thermal behavior of the carbon anode in a lithium-ion cell using a four-probe technique. *J. Power Sources* **2012**, *198*, 351–358. doi:10.1016/j.jpowsour.2011.09.077.
137. Beelen, H.; Raijmakers, L.; Donkers, M.; Notten, P.; Bergveld, H.J. An Improved Impedance-Based Temperature Estimation Method for Li-ion Batteries. *IFAC-PapersOnLine* **2015**, *48*, 383–388. doi:10.1016/j.ifacol.2015.10.055.
138. Beelen, H.; Raijmakers, L.; Donkers, M.; Notten, P.; Bergveld, H.J. A comparison and accuracy analysis of impedance-based temperature estimation methods for Li-ion batteries. *Appl. Energy* **2016**, *175*, 128–140. doi:10.1016/j.apenergy.2016.04.103.
139. Beelen, H.; Mundaragi Shivakumar, K.; Raijmakers, L.; Donkers, M.; Bergveld, H.J. Towards impedance-based temperature estimation for Li-ion battery packs. *Int. J. Energy Res.* **2020**, *44*, 2889–2908. doi:10.1002/er.5107.
140. Carkhuff, B.G.; Demirev, P.A.; Srinivasan, R. Impedance-Based Battery Management System for Safety Monitoring of Lithium-Ion Batteries. *IEEE Trans. Ind. Electron.* **2018**, *65*, 6497–6504. doi:10.1109/TIE.2017.2786199.
141. Haussmann, P.; Melbert, J. Internal Cell Temperature Measurement and Thermal Modeling of Lithium Ion Cells for Automotive Applications by Means of Electrochemical Impedance Spectroscopy. *SAE Int. J. Altern. Powertrains* **2017**, *6*, 261–270. doi:10.4271/2017-01-1215.
142. Morello, R.; Di Rienzo, R.; Roncella, R.; Saletti, R.; Schwarz, R.; Lorentz, V.; Hoedemaekers, E.; Rosca, B.; Baronti, F. Advances in Li-Ion Battery Management for Electric Vehicles. In Proceedings of the IECON 2018—44th Annual Conference of the IEEE Industrial Electronics Society, Washington, DC, USA, 21–23 October 2018; pp. 4949–4955. doi:10.1109/IECON.2018.8591185.
143. Raijmakers, L.; Danilov, D.L.; van Lammeren, J.; Lammers, M.; Notten, P. Sensorless battery temperature measurements based on electrochemical impedance spectroscopy. *J. Power Sources* **2014**, *247*, 539–544. doi:10.1016/j.jpowsour.2013.09.005.
144. Raijmakers, L.H.J.; Danilov, D.L.; van Lammeren, J.P.M.; Lammers, T.J.G.; Bergveld, H.J.; Notten, P.H.L. Non-Zero Intercept Frequency: An Accurate Method to Determine the Integral Temperature of Li-Ion Batteries. *IEEE Trans. Ind. Electron.* **2016**, *63*, 3168–3178. doi:10.1109/TIE.2016.2516961.
145. Raijmakers, L. *Sensorless Temperature Measurements for Advanced Battery Management Systems*; 2018.
146. Ranieri, M.; Alberto, D.; Piret, H.; Cattin, V. Electronic module for the thermal monitoring of a Li-ion battery cell through the electrochemical impedance estimation. In Proceedings of the THERMINIC 2016—22nd International Workshop Thermal Investigations of ICs and Systems, Budapest, Hungary, 21–23 September 2016; IEEE: Piscataway, NJ, USA, 2016; pp. 294–297. doi:10.1109/THERMINIC.2016.7749069.
147. Richardson, R.R.; Zhao, S.; Howey, D.A. On-board monitoring of 2D spatially-resolved temperatures in cylindrical lithium-ion batteries: Part II. State estimation via impedance-based temperature sensing. *J. Power Sources* **2016**, *327*, 726–735. doi:10.1016/j.jpowsour.2016.06.104.
148. Schmidt, J.P.; Arnold, S.; Loges, A.; Werner, D.; Wetzels, T.; Ivers-Tiffée, E. Measurement of the internal cell temperature via impedance: Evaluation and application of a new method. *J. Power Sources* **2013**, *243*, 110–117. doi:10.1016/j.jpowsour.2013.06.013.
149. Schwarz, R.; Semmler, K.; Wenger, M.; Lorentz, V.R.H.; Marz, M. Sensorless battery cell temperature estimation circuit for enhanced safety in battery systems. In Proceedings of the IECON 2015—Yokohama, Yokohama, Japan, 9–12 November 2015; Ohishi, K., Hashimoto, H., Eds.; IEEE: Piscataway, NJ, USA, 2015; pp. 001536–001541. doi:10.1109/IECON.2015.7392319.
150. Socher, S.; Jehle, C.; Potthoff, U. Improving the Functional Safety of Automotive Batteries Using in-situ Impedance Spectroscopy. *Transp. Res. Procedia* **2016**, *14*, 3661–3666. doi:10.1016/j.trpro.2016.05.437.
151. Spinner, N.S.; Love, C.T.; Rose-Pehrsson, S.L.; Tuttle, S.G. Expanding the Operational Limits of the Single-Point Impedance Diagnostic for Internal Temperature Monitoring of Lithium-ion Batteries. *Electrochim. Acta* **2015**, *174*, 488–493. doi:10.1016/j.electacta.2015.06.003.

152. Srinivasan, R.; Demirev, P.A.; Carkhuff, B.G. Rapid monitoring of impedance phase shifts in lithium-ion batteries for hazard prevention. *J. Power Sources* **2018**, *405*, 30–36. doi:10.1016/j.jpowsour.2018.10.014.
153. Wang, L.; Lu, D.; Song, M.; Zhao, X.; Li, G. Instantaneous estimation of internal temperature in lithium-ion battery by impedance measurement. *Int. J. Energy Res.* **2020**, *44*, 3082–3097. doi:10.1002/er.5144.
154. Wang, X.; Wei, X.; Dai, H.; Wu, Q. State Estimation of Lithium Ion Battery Based on Electrochemical Impedance Spectroscopy with On-Board Impedance Measurement System. In Proceedings of the 2015 IEEE Vehicle Power and Propulsion Conference (VPPC), Montreal, QC, Canada, 19–22 October 2015; IEEE: Piscataway, NJ, USA, 2015; pp. 1–5. doi:10.1109/VPPC.2015.7353021.
155. Wang, X.; Wei, X.; Chen, Q.; Zhu, J.; Dai, H. Lithium-ion battery temperature online estimation based on fast impedance calculation. *J. Energy Storage* **2019**, *26*, 100952. doi:10.1016/j.est.2019.100952.
156. Zhu, J.G.; Sun, Z.C.; Wei, X.Z.; Dai, H.F. A new lithium-ion battery internal temperature online estimate method based on electrochemical impedance spectroscopy measurement. *J. Power Sources* **2015**, *274*, 990–1004. doi:10.1016/j.jpowsour.2014.10.182.
157. Zhu, J.; Sun, Z.; Wei, X.; Dai, H. Battery Internal Temperature Estimation for LiFePO<sub>4</sub> Battery Based on Impedance Phase Shift under Operating Conditions. *Energies* **2017**, *10*, 60. doi:10.3390/en10010060.
158. Liebhart, B.; Diehl, S.; Endisch, C. Sensitivity Analysis of Battery Cell Aging Estimators based on Impedance Spectroscopy regarding Temperature Compensation. In Proceedings of the 2020 IEEE Conference on Control Technology and Applications (CCTA), Montreal, QC, Canada, 24–26 August 2020; pp. 801–806. doi:10.1109/CCTA41146.2020.9206395.
159. Rivera-Barrera, J.; Muñoz-Galeano, N.; Sarmiento-Maldonado, H. SoC Estimation for Lithium-ion Batteries: Review and Future Challenges. *Electronics* **2017**, *6*, 102. doi:10.3390/electronics6040102.
160. Shrivastava, P.; Soon, T.K.; Idris, M.Y.I.B.; Mekhilef, S. Overview of model-based online state-of-charge estimation using Kalman filter family for lithium-ion batteries. *Renew. Sustain. Energy Rev.* **2019**, *113*, 109233. doi:10.1016/j.rser.2019.06.040.
161. Plett, G.L. Efficient Battery Pack State Estimation using Bar-Delta Filtering. In Proceedings of the International Battery, Hybrid and Fuel Cell Electric Vehicle Symposium, Stavanger, Norway, 13–16 May 2009; pp. 1–8.
162. Roscher, M.A.; Bohlen, O.S.; Sauer, D.U. Reliable State Estimation of Multicell Lithium-Ion Battery Systems. *IEEE Trans. Energy Convers.* **2011**, *26*, 737–743. doi:10.1109/TEC.2011.2155657.
163. Dai, H.; Wei, X.; Sun, Z.; Wang, J.; Gu, W. Online cell SOC estimation of Li-ion battery packs using a dual time-scale Kalman filtering for EV applications. *Appl. Energy* **2012**, *95*, 227–237. doi:10.1016/j.apenergy.2012.02.044.
164. Zheng, Y.; Ouyang, M.; Lu, L.; Li, J.; Han, X.; Xu, L.; Ma, H.; Dollmeyer, T.A.; Freyermuth, V. Cell state-of-charge inconsistency estimation for LiFePO<sub>4</sub> battery pack in hybrid electric vehicles using mean-difference model. *Appl. Energy* **2013**, *111*, 571–580. doi:10.1016/j.apenergy.2013.05.048.
165. Sun, F.; Xiong, R.; He, H. A systematic state-of-charge estimation framework for multi-cell battery pack in electric vehicles using bias correction technique. *Appl. Energy* **2016**, *162*, 1399–1409. doi:10.1016/j.apenergy.2014.12.021.
166. Yang, C.; Wang, X.; Fang, Q.; Dai, H.; Cao, Y.; Wei, X. An online SOC and capacity estimation method for aged lithium-ion battery pack considering cell inconsistency. *J. Energy Storage* **2020**, *29*, 101250. doi:10.1016/j.est.2020.101250.
167. Zhong, L.; Zhang, C.; He, Y.; Chen, Z. A method for the estimation of the battery pack state of charge based on in-pack cells uniformity analysis. *Appl. Energy* **2014**, *113*, 558–564. doi:10.1016/j.apenergy.2013.08.008.
168. Chun, C.Y.; Baek, J.; Seo, G.S.; Cho, B.H.; Kim, J.; Chang, I.K.; Lee, S. Current sensor-less state-of-charge estimation algorithm for lithium-ion batteries utilizing filtered terminal voltage. *J. Power Sources* **2015**, *273*, 255–263. doi:10.1016/j.jpowsour.2014.08.121.
169. Fleischer, C.; Waag, W.; Heyn, H.M.; Sauer, D.U. On-line adaptive battery impedance parameter and state estimation considering physical principles in reduced order equivalent circuit battery models. *J. Power Sources* **2014**, *260*, 276–291. doi:10.1016/j.jpowsour.2014.01.129.
170. Moura, S.J.; Chaturvedi, N.A.; Krstic, M. PDE estimation techniques for advanced battery management systems—Part I: SOC estimation. In Proceedings of the 2012 American Control Conference (ACC), Montreal, QC, Canada, 27–29 June 2012; pp. 559–565. doi:10.1109/ACC.2012.6315019.
171. Xu, J.; Mi, C.C.; Cao, B.; Deng, J.; Chen, Z.; Li, S. The State of Charge Estimation of Lithium-Ion Batteries Based on a Proportional-Integral Observer. *IEEE Trans. Veh. Technol.* **2014**, *63*, 1614–1621. doi:10.1109/TVT.2013.2287375.
172. Kim, I.S. The novel state of charge estimation method for lithium battery using sliding mode observer. *J. Power Sources* **2006**, *163*, 584–590. doi:10.1016/j.jpowsour.2006.09.006.
173. Kim, T.; Qiao, W.; Qu, L. Online SOC and SOH estimation for multicell lithium-ion batteries based on an adaptive hybrid battery model and sliding-mode observer. In Proceedings of the IEEE Energy Conversion Congress and Exposition (ECCE), Denver, CO, USA, 15–19 September 2013; IEEE: Piscataway, NJ, USA, 2013; pp. 292–298. doi:10.1109/ECCE.2013.6646714.
174. Hu, C.; Youn, B.D.; Chung, J. A multiscale framework with extended Kalman filter for lithium-ion battery SOC and capacity estimation. *Appl. Energy* **2012**, *92*, 694–704. doi:10.1016/j.apenergy.2011.08.002.
175. Kim, J.; Cho, B.H. State-of-Charge Estimation and State-of-Health Prediction of a Li-Ion Degraded Battery Based on an EKF Combined With a Per-Unit System. *IEEE Trans. Veh. Technol.* **2011**, *60*, 4249–4260. doi:10.1109/TVT.2011.2168987.
176. Mastali, M.; Vazquez-Arenas, J.; Fraser, R.; Fowler, M.; Afshar, S.; Stevens, M. Battery state of the charge estimation using Kalman filtering. *J. Power Sources* **2013**, *239*, 294–307. doi:10.1016/j.jpowsour.2013.03.131.
177. Plett, G.L. Extended Kalman filtering for battery management systems of LiPB-based HEV battery packs: Part 3. State and parameter estimation. *J. Power Sources* **2004**, *134*, 277–292. doi:10.1016/j.jpowsour.2004.02.033.

178. Santhanagopalan, S.; White, R.E. Online estimation of the state of charge of a lithium ion cell. *J. Power Sources* **2006**, *161*, 1346–1355. doi:10.1016/j.jpowsour.2006.04.146.
179. Lai, X.; Qin, C.; Gao, W.; Zheng, Y.; Yi, W. A State of Charge Estimator Based Extended Kalman Filter Using an Electrochemistry-Based Equivalent Circuit Model for Lithium-Ion Batteries. *Appl. Sci.* **2018**, *8*, 1592. doi:10.3390/app8091592.
180. Li, W.; Fan, Y.; Ringbeck, F.; Jöst, D.; Han, X.; Ouyang, M.; Sauer, D.U. Electrochemical model-based state estimation for lithium-ion batteries with adaptive unscented Kalman filter. *J. Power Sources* **2020**, *476*, 228534. doi:10.1016/j.jpowsour.2020.228534.
181. Zheng, Y.; Ouyang, M.; Han, X.; Lu, L.; Li, J. Investigating the error sources of the online state of charge estimation methods for lithium-ion batteries in electric vehicles. *J. Power Sources* **2018**, *377*, 161–188. doi:10.1016/j.jpowsour.2017.11.094.
182. Lin, C.; Yu, Q.; Xiong, R.; Le Wang, Y. A study on the impact of open circuit voltage tests on state of charge estimation for lithium-ion batteries. *Appl. Energy* **2017**, *205*, 892–902. doi:10.1016/j.apenergy.2017.08.124.
183. Pop, V.; Bergveld, H.J.; Op het Veld, J.H.G.; Regtien, P.P.L.; Danilov, D.; Notten, P.H.L. Modeling Battery Behavior for Accurate State-of-Charge Indication. *J. Electrochem. Soc.* **2006**, *153*, A2013. doi:10.1149/1.2335951.
184. Walder, G.; Campestrini, C.; Lienkamp, M.; Jossen, A. Adaptive State and Parameter Estimation of Lithium-Ion Batteries Based on a Dual Linear Kalman Filter. In Proceedings of the Second International Conference on Technological Advances in Electrical, Electronics and Computer Engineering, Kuala Lumpur, Malaysia, 18–20 March 2014; pp. 16–24.
185. Zou, Y.; Hu, X.; Ma, H.; Li, S.E. Combined State of Charge and State of Health estimation over lithium-ion battery cell cycle lifespan for electric vehicles. *J. Power Sources* **2015**, *273*, 793–803. doi:10.1016/j.jpowsour.2014.09.146.
186. Zou, C.; Manzie, C.; Nešić, D.; Kallapur, A.G. Multi-time-scale observer design for state-of-charge and state-of-health of a lithium-ion battery. *J. Power Sources* **2016**, *335*, 121–130. doi:10.1016/j.jpowsour.2016.10.040.
187. Rubagotti, M.; Onori, S.; Rizzoni, G. Automotive Battery Prognostics Using Dual Extended Kalman Filter. In Proceedings of the ASME 2009 Dynamic Systems and Control Conference, Hollywood, CA, USA, 12–14 October 2009; ASME: Two Park Avenue, NY, USA, 2009; Volume 2, pp. 257–263. doi:10.1115/DSCC2009-2725.
188. Sun, F.; Xiong, R.; He, H. Estimation of state-of-charge and state-of-power capability of lithium-ion battery considering varying health conditions. *J. Power Sources* **2014**, *259*, 166–176. doi:10.1016/j.jpowsour.2014.02.095.
189. Kim, J.; Cho, B.H. Pattern Recognition for Temperature-Dependent State-of-Charge/Capacity Estimation of a Li-ion Cell. *IEEE Trans. Energy Convers.* **2013**, *28*, 1–11. doi:10.1109/TEC.2012.2222884.
190. Maletić, F.; Hrgetić, M.; Deur, J. Dual Nonlinear Kalman Filter-Based SoC and Remaining Capacity Estimation for an Electric Scooter Li-NMC Battery Pack. *Energies* **2020**, *13*, 540. doi:10.3390/en13030540.
191. Dragicevic, T.; Sucic, S.; Guerrero, J.M. Battery state-of-charge and parameter estimation algorithm based on Kalman filter. In Proceedings of the Eurocon 2013, Zagreb, Croatia, 1–4 July 2013; pp. 1519–1525. doi:10.1109/EUROCON.2013.6625179.
192. Andre, D.; Appel, C.; Soczka-Guth, T.; Sauer, D.U. Advanced mathematical methods of SOC and SOH estimation for lithium-ion batteries. *J. Power Sources* **2013**, *224*, 20–27. doi:10.1016/j.jpowsour.2012.10.001.
193. Guo, F.; Hu, G.; Hong, R. A parameter adaptive method with dead zone for state of charge and parameter estimation of lithium-ion batteries. *J. Power Sources* **2018**, *402*, 174–182. doi:10.1016/j.jpowsour.2018.09.015.
194. Plett, G.L. Sigma-point Kalman filtering for battery management systems of LiPB-based HEV battery packs: Part 2: Simultaneous state and parameter estimation. *J. Power Sources* **2006**, *161*, 1369–1384. doi:10.1016/j.jpowsour.2006.06.004.
195. Zhang, F.; Rehman, M.M.U.; Wang, H.; Levron, Y.; Plett, G.; Zane, R.; Maksimovic, D. State-of-charge estimation based on microcontroller-implemented sigma-point Kalman filter in a modular cell balancing system for Lithium-Ion battery packs. In Proceedings of the 2015 IEEE 16th Workshop on Control and Modeling for Power Electronics (COMPEL), Vancouver, BC, Canada, 12–15 July 2015; IEEE: Piscataway, NJ, USA, 2015; pp. 1–7. doi:10.1109/COMPEL.2015.7236525.
196. Xiong, R.; Sun, F.; Gong, X.; He, H. Adaptive state of charge estimator for lithium-ion cells series battery pack in electric vehicles. *J. Power Sources* **2013**, *242*, 699–713. doi:10.1016/j.jpowsour.2013.05.071.
197. Sun, F.; Hu, X.; Zou, Y.; Li, S. Adaptive unscented Kalman filtering for state of charge estimation of a lithium-ion battery for electric vehicles. *Energy* **2011**, *36*, 3531–3540. doi:10.1016/j.energy.2011.03.059.
198. Shen, P.; Ouyang, M.; Lu, L.; Li, J.; Feng, X. The Co-estimation of State of Charge, State of Health, and State of Function for Lithium-Ion Batteries in Electric Vehicles. *IEEE Trans. Veh. Technol.* **2018**, *67*, 92–103. doi:10.1109/TVT.2017.2751613.
199. Xu, W.; Xu, J.; Yan, X. Lithium-ion battery state of charge and parameter joint estimation using cubature Kalman filter and particle filter. *J. Power Electron.* **2020**, *20*, 292–307. doi:10.1007/s43236-019-00023-4.
200. Ganeshan.; Abhash. Estimation of SOC and SOH using Mixed Neural Network and Coulomb Counting Algorithm. *Int. J. Innov. Technol. Explor. Eng.* **2019**, *8*, 2557–2561. doi:10.35940/ijitee.J1308.0881019.
201. Rahbari, O.; Omar, N.; van den Bossche, P.; van Mierlo, J. A centralized state of charge estimation technique for electric vehicles equipped with lithium-ion batteries in smart grid environment. In Proceedings of the 2018 IEEE International Conference on Industrial Technology (ICIT), Lyon, France, 20–22 February 2018; pp. 1721–1725. doi:10.1109/ICIT.2018.8352442.
202. Yang, F.; Li, W.; Li, C.; Miao, Q. State-of-charge estimation of lithium-ion batteries based on gated recurrent neural network. *Energy* **2019**, *175*, 66–75. doi:10.1016/j.energy.2019.03.059.
203. Zahid, T.; Xu, K.; Li, W.; Li, C.; Li, H. State of charge estimation for electric vehicle power battery using advanced machine learning algorithm under diversified drive cycles. *Energy* **2018**, *162*, 871–882. doi:10.1016/j.energy.2018.08.071.
204. Li, R.; Xu, S.; Li, S.; Zhou, Y.; Zhou, K.; Liu, X.; Yao, J. State of Charge Prediction Algorithm of Lithium-Ion Battery Based on PSO-SVR Cross Validation. *IEEE Access* **2020**, *8*, 10234–10242. doi:10.1109/ACCESS.2020.2964852.

205. Shi, Q.S.; Zhang, C.H.; Cui, N.X. Estimation of battery state-of-charge using v-support vector regression algorithm. *Int. J. Automot. Technol.* **2008**, *9*, 759–764.
206. Ozcan, G.; Pajovic, M.; Sahinoglu, Z.; Wang, Y.; Orlik, P.V.; Wada, T. Online battery state-of-charge estimation based on sparse gaussian process regression. In Proceedings of the 2016 IEEE Power and Energy Society General Meeting (PESGM), Boston, MA, USA, 17–21 July 2016; pp. 1–5. doi:10.1109/PESGM.2016.7741980.
207. Howey, D.A.; Mitcheson, P.D.; Yufit, V.; Offer, G.J.; Brandon, N.P. Online Measurement of Battery Impedance Using Motor Controller Excitation. *IEEE Trans. Veh. Technol.* **2014**, *63*, 2557–2566. doi:10.1109/TVT.2013.2293597.
208. Jansen, P.; Vergossen, D.; Renner, D.; John, W.; Götz, J. Impedance spectra classification for determining the state of charge on a lithium iron phosphate cell using a support vector machine. *Adv. Radio Sci.* **2015**, *13*, 127–132. doi:10.5194/ars-13-127-2015.
209. Mohan, S.; Kim, Y.; Siegel, J.B.; Samad, N.A.; Stefanopoulou, A.G. A Phenomenological Model of Bulk Force in a Li-Ion Battery Pack and Its Application to State of Charge Estimation. *J. Electrochem. Soc.* **2014**, *161*, A2222–A2231. doi:10.1149/2.0841414jes.
210. Mohan, S.; Kim, Y.; Stefanopoulou, A.G. On Improving Battery State of Charge Estimation Using Bulk Force Measurements. In *Volume 1: Adaptive and Intelligent 28 October 2015*; p.V001T13A010. doi:10.1115/DSCC2015-9966.
211. Ganguli, A.; Saha, B.; Raghavan, A.; Kiesel, P.; Arakaki, K.; Schuh, A.; Schwartz, J.; Hegyi, A.; Sommer, L.W.; Lochbaum, A.; et al. Embedded fiber-optic sensing for accurate internal monitoring of cell state in advanced battery management systems part 2: Internal cell signals and utility for state estimation. *J. Power Sources* **2017**, *341*, 474–482. doi:10.1016/j.jpowsour.2016.11.103.
212. Ghannoum, A.; Norris, R.C.; Iyer, K.; Zdravkova, L.; Yu, A.; Nieva, P. Optical Characterization of Commercial Lithiated Graphite Battery Electrodes and in Situ Fiber Optic Evanescent Wave Spectroscopy. *ACS Appl. Mater. Interfaces* **2016**, *8*, 18763–18769. doi:10.1021/acsami.6b03638.
213. Ghannoum, A.; Nieva, P.; Yu, A.; Khajepour, A. Development of Embedded Fiber-Optic Evanescent Wave Sensors for Optical Characterization of Graphite Anodes in Lithium-Ion Batteries. *ACS Appl. Mater. Interfaces* **2017**, *9*, 41284–41290. doi:10.1021/acsami.7b13464.
214. Modrzynski, C.; Roscher, V.; Rittweger, F.; Ghannoum, A.; Nieva, P.; Riemschneider, K.R. Integrated Optical Fibers for Simultaneous Monitoring of the Anode and the Cathode in Lithium Ion Batteries. In Proceedings of the IEEE SENSORS 2019, Montreal, QC, Canada, 27–30 October 2019; IEEE: Piscataway, NJ, USA, 2019; pp. 1–4. doi:10.1109/SENSORS43011.2019.8956755.
215. Birkel, C.R.; Roberts, M.R.; McTurk, E.; Bruce, P.G.; Howey, D.A. Degradation diagnostics for lithium ion cells. *J. Power Sources* **2017**, *341*, 373–386. doi:10.1016/j.jpowsour.2016.12.011.
216. Lewerenz, M.; Marongiu, A.; Warnecke, A.; Sauer, D.U. Differential voltage analysis as a tool for analyzing inhomogeneous aging: A case study for  $\text{LiFePO}_4$ /Graphite cylindrical cells. *J. Power Sources* **2017**, *368*, 57–67. doi:10.1016/j.jpowsour.2017.09.059.
217. Haifeng, D.; Xuezhe, W.; Zechang, S. A new SOH prediction concept for the power lithium-ion battery used on HEVs. In Proceedings of the IEEE Vehicle Power and Propulsion Conference, Dearborn, MI, USA, 7–10 September 2009; IEEE: Piscataway, NJ, USA, 2009; pp. 1649–1653. doi:10.1109/VPPC.2009.5289654.
218. Berecibar, M.; Gandiaga, I.; Villarreal, I.; Omar, N.; van Mierlo, J.; van den Bossche, P. Critical review of state of health estimation methods of Li-ion batteries for real applications. *Renew. Sustain. Energy Rev.* **2016**, *56*, 572–587. doi:10.1016/j.rser.2015.11.042.
219. Xiong, R.; Li, L.; Tian, J. Towards a smarter battery management system: A critical review on battery state of health monitoring methods. *J. Power Sources* **2018**, *405*, 18–29. doi:10.1016/j.jpowsour.2018.10.019.
220. Tian, H.; Qin, P.; Li, K.; Zhao, Z. A review of the state of health for lithium-ion batteries: Research status and suggestions. *J. Clean. Prod.* **2020**, *261*, 120813. doi:10.1016/j.jclepro.2020.120813.
221. Li, Y.; Liu, K.; Foley, A.M.; Zülke, A.; Berecibar, M.; Nanini-Maury, E.; van Mierlo, J.; Hoster, H.E. Data-driven health estimation and lifetime prediction of lithium-ion batteries: A review. *Renew. Sustain. Energy Rev.* **2019**, *113*, 109254. doi:10.1016/j.rser.2019.109254.
222. Tröltzsch, U.; Kanoun, O.; Tränkler, H.R. Characterizing aging effects of lithium ion batteries by impedance spectroscopy. *Electrochim. Acta* **2006**, *51*, 1664–1672. doi:10.1016/j.electacta.2005.02.148.
223. Lee, S.; Kim, J.; Lee, J.; Cho, B.H. State-of-charge and capacity estimation of lithium-ion battery using a new open-circuit voltage versus state-of-charge. *J. Power Sources* **2008**, *185*, 1367–1373. doi:10.1016/j.jpowsour.2008.08.103.
224. Chiang, Y.H.; Sean, W.Y. Dynamical estimation of State-of-Health of batteries by using adaptive observer. In Proceedings of the 2009 2nd International Conference on Power Electronics and Intelligent Transportation System (PEITS), Shenzhen, China, 19–20 December 2009; pp. 110–115. doi:10.1109/PEITS.2009.5407059.
225. Plett, G.L. Recursive approximate weighted total least squares estimation of battery cell total capacity. *J. Power Sources* **2011**, *196*, 2319–2331. doi:10.1016/j.jpowsour.2010.09.048.
226. Remmlinger, J.; Buchholz, M.; Meiler, M.; Bernreuter, P.; Dietmayer, K. State-of-health monitoring of lithium-ion batteries in electric vehicles by on-board internal resistance estimation. *J. Power Sources* **2011**, *196*, 5357–5363. doi:10.1016/j.jpowsour.2010.08.035.
227. Rahimian, S.K.; Rayman, S.; White, R.E. State of Charge and Loss of Active Material Estimation of a Lithium Ion Cell under Low Earth Orbit Condition Using Kalman Filtering Approaches. *J. Electrochem. Soc.* **2012**, *159*, A860. doi:10.1149/2.098206jes.
228. Feng, X.; Li, J.; Ouyang, M.; Lu, L.; Li, J.; He, X. Using probability density function to evaluate the state of health of lithium-ion batteries. *J. Power Sources* **2013**, *232*, 209–218. doi:10.1016/j.jpowsour.2013.01.018.
229. Nuhic, A.; Terzimehic, T.; Soczka-Guth, T.; Buchholz, M.; Dietmayer, K. Health diagnosis and remaining useful life prognostics of lithium-ion batteries using data-driven methods. *J. Power Sources* **2013**, *239*, 680–688. doi:10.1016/j.jpowsour.2012.11.146.

230. Prasad, G.K.; Rahn, C.D. Model based identification of aging parameters in lithium ion batteries. *J. Power Sources* **2013**, *232*, 79–85. doi:10.1016/j.jpowsour.2013.01.041.
231. Remmlinger, J.; Buchholz, M.; Soczka-Guth, T.; Dietmayer, K. On-board state-of-health monitoring of lithium-ion batteries using linear parameter-varying models. *J. Power Sources* **2013**, *239*, 689–695. doi:10.1016/j.jpowsour.2012.11.102.
232. Schwunk, S.; Straub, S.; Armbruster, N.; Matting, S.; Vetter, M. Parallel particle filter for state of charge and health estimation with a long term test. In Proceedings of the World Electric Vehicle Symposium and Exposition (EVS 27), Barcelona, Spain, 17–20 November 2013; IEEE: Piscataway, NJ, USA, 2013; pp. 1–10. doi:10.1109/EVS.2013.6914726.
233. Weng, C.; Cui, Y.; Sun, J.; Peng, H. On-board state of health monitoring of lithium-ion batteries using incremental capacity analysis with support vector regression. *J. Power Sources* **2013**, *235*, 36–44. doi:10.1016/j.jpowsour.2013.02.012.
234. Zheng, Y.; Lu, L.; Han, X.; Li, J.; Ouyang, M. LiFePO<sub>4</sub> battery pack capacity estimation for electric vehicles based on charging cell voltage curve transformation. *J. Power Sources* **2013**, *226*, 33–41. doi:10.1016/j.jpowsour.2012.10.057.
235. Eddahech, A.; Briat, O.; Vinassa, J.M. Determination of lithium-ion battery state-of-health based on constant-voltage charge phase. *J. Power Sources* **2014**, *258*, 218–227. doi:10.1016/j.jpowsour.2014.02.020.
236. Guo, Z.; Qiu, X.; Hou, G.; Liaw, B.Y.; Zhang, C. State of health estimation for lithium ion batteries based on charging curves. *J. Power Sources* **2014**, *249*, 457–462. doi:10.1016/j.jpowsour.2013.10.114.
237. Han, X.; Ouyang, M.; Lu, L.; Li, J. A comparative study of commercial lithium ion battery cycle life in electric vehicle: Capacity loss estimation. *J. Power Sources* **2014**, *268*, 658–669. doi:10.1016/j.jpowsour.2014.06.111.
238. Hu, X.; Li, S.E.; Jia, Z.; Egardt, B. Enhanced sample entropy-based health management of Li-ion battery for electrified vehicles. *Energy* **2014**, *64*, 953–960. doi:10.1016/j.energy.2013.11.061.
239. Bercebar, M.; Omar, N.; Garmendia, M.; Dubarry, M.; Villarreal, I.; van den Bossche, P.; van Mierlo, J. SOH Estimation and Prediction for NMC Cells Based on Degradation Mechanism Detection. In Proceedings of the 2015 IEEE Vehicle Power and Propulsion Conference (VPPC), Montreal, QC, Canada, 19–22 October 2015; pp. 1–6. doi:10.1109/VPPC.2015.7353020.
240. Wu, J.; Wang, Y.; Zhang, X.; Chen, Z. A novel state of health estimation method of Li-ion battery using group method of data handling. *J. Power Sources* **2016**, *327*, 457–464. doi:10.1016/j.jpowsour.2016.07.065.
241. Dubarry, M.; Bercebar, M.; Devie, A.; Anseán, D.; Omar, N.; Villarreal, I. State of health battery estimator enabling degradation diagnosis: Model and algorithm description. *J. Power Sources* **2017**, *360*, 59–69. doi:10.1016/j.jpowsour.2017.05.121.
242. Gong, W.; Chen, Y.; Kou, L.; Kang, R.; Yang, Y. Life Prediction of Lithium Ion Batteries for Electric Vehicles Based on Gas Production Behavior Model. In Proceedings of the 2017 International Conference on Sensing, Diagnostics, Prognostics, and Control, Shanghai, China, 16–18 August 2017; Li, C., Ed.; IEEE: Piscataway, NJ, USA, 2017; pp. 275–280. doi:10.1109/SDPC.2017.60.
243. Huhman, B.M. A Single-Frequency Impedance Diagnostic for State of Health Determination in Li-ion 4P1S Battery Packs. Ph.D. Thesis, Virginia State University, Falls Church, VA, USA, 2017.
244. Sánchez, L.; Couso, I.; Otero, J.; Echevarría, Y.; Anseán, D.; Sánchez, L.; Couso, I.; Otero, J.; Echevarría, Y.; Anseán, D. A Model-Based Virtual Sensor for Condition Monitoring of Li-Ion Batteries in Cyber-Physical Vehicle Systems. *J. Sens.* **2017**, *2017*, 9643279. doi:10.1155/2017/9643279.
245. Cai, Y.; Yang, L.; Deng, Z.; Zhao, X.; Deng, H. Online identification of lithium-ion battery state-of-health based on fast wavelet transform and cross D-Markov machine. *Energy* **2018**, *147*, 621–635. doi:10.1016/j.energy.2018.01.001.
246. Chen, Z.; Sun, M.; Shu, X.; Shen, J.; Xiao, R. On-board state of health estimation for lithium-ion batteries based on random forest. In Proceedings of the 2018 IEEE International Conference on Industrial Technology (ICIT), Lyon, France, 20–22 February 2018; pp. 1754–1759. doi:10.1109/ICIT.2018.8352448.
247. Lajara, R.; Perez-Solano, J.J.; Pelegri-Sebastia, J. Predicting the batteries' state of health in wireless sensor networks applications. *IEEE Trans. Ind. Electron.* **2018**, *65*, 8936–8945. doi:10.1109/TIE.2018.2808925.
248. Li, Y.; Abdel-Monem, M.; Gopalakrishnan, R.; Bercebar, M.; Nanini-Maury, E.; Omar, N.; van den Bossche, P.; van Mierlo, J. A quick online state of health estimation method for Li-ion battery with incremental capacity curves processed by Gaussian filter. *J. Power Sources* **2018**, *373*, 40–53. doi:10.1016/j.jpowsour.2017.10.092.
249. Li, S.; Pischinger, S.; He, C.; Liang, L.; Stapelbroek, M. A comparative study of model-based capacity estimation algorithms in dual estimation frameworks for lithium-ion batteries under an accelerated aging test. *Appl. Energy* **2018**, *212*, 1522–1536. doi:10.1016/j.apenergy.2018.01.008.
250. Santos, S.R.d.; Aranha, J.C.M.S.; Nascimento, T.C.d.; Vieira, D.; Junior, E.M.O.; Cerri, F. Study of machine learning algorithms to state of health estimation of iron phosphate lithium-ion battery used in fully electric vehicles. In Proceedings of the 2018 SAE Brasil Congress & Exhibition, Sao Paulo, Brazil, 3–5 September 2018. doi:10.4271/2018-36-0178.
251. Smiley, A.; Plett, G.L. An adaptive physics-based reduced-order model of an aged lithium-ion cell, selected using an interacting multiple-model Kalman filter. *J. Energy Storage* **2018**, *19*, 120–134. doi:10.1016/j.est.2018.07.004.
252. Tang, X.; Zou, C.; Yao, K.; Chen, G.; Liu, B.; He, Z.; Gao, F. A fast estimation algorithm for lithium-ion battery state of health. *J. Power Sources* **2018**, *396*, 453–458. doi:10.1016/j.jpowsour.2018.06.036.
253. Wassiliadis, N.; Adermann, J.; Frericks, A.; Pak, M.; Reiter, C.; Lohmann, B.; Lienkamp, M. Revisiting the dual extended Kalman filter for battery state-of-charge and state-of-health estimation: A use-case life cycle analysis. *J. Energy Storage* **2018**, *19*, 73–87. doi:10.1016/j.est.2018.07.006.
254. Yu, Q.; Xiong, R.; Yang, R.; Pecht, M.G. Online capacity estimation for lithium-ion batteries through joint estimation method. *Appl. Energy* **2019**, *255*, 113817. doi:10.1016/j.apenergy.2019.113817.

255. Zheng, Y.; Qin, C.; Lai, X.; Han, X.; Xie, Y. A novel capacity estimation method for lithium-ion batteries using fusion estimation of charging curve sections and discrete Arrhenius aging model. *Appl. Energy* **2019**, *251*, 113327. doi:10.1016/j.apenergy.2019.113327.
256. Bi, Y.; Yin, Y.; Choe, S.Y. Online state of health and aging parameter estimation using a physics-based life model with a particle filter. *J. Power Sources* **2020**, *476*, 228655. doi:10.1016/j.jpowsour.2020.228655.
257. Jiang, B.; Dai, H.; Wei, X. Incremental capacity analysis based adaptive capacity estimation for lithium-ion battery considering charging condition. *Appl. Energy* **2020**, *269*, 115074. doi:10.1016/j.apenergy.2020.115074.
258. Liu, H.; Naqvi, I.H.; Li, F.; Liu, C.; Shafiei, N.; Li, Y.; Pecht, M. An analytical model for the CC-CV charge of Li-ion batteries with application to degradation analysis. *J. Energy Storage* **2020**, *29*, 101342. doi:10.1016/j.est.2020.101342.
259. Shu, X.; Li, G.; Zhang, Y.; Shen, J.; Chen, Z.; Liu, Y. Online diagnosis of state of health for lithium-ion batteries based on short-term charging profiles. *J. Power Sources* **2020**, *471*, 228478. doi:10.1016/j.jpowsour.2020.228478.
260. Xu, J.; Mei, X.; Wang, X.; Fu, Y.; Zhao, Y.; Wang, J. A Relative State of Health Estimation Method Based on Wavelet Analysis for Lithium-Ion Battery Cells. *IEEE Trans. Ind. Electron.* **2020**, p. 1. doi:10.1109/TIE.2020.3001836.
261. Yang, J.; Du, C.; Liu, W.; Wang, T.; Yan, L.; Gao, Y.; Cheng, X.; Zuo, P.; Ma, Y.; Yin, G.; Xie, J. State-of-health estimation for satellite batteries based on the actual operating parameters—Health indicator extraction from the discharge curves and state estimation. *J. Energy Storage* **2020**, *31*, 101490. doi:10.1016/j.est.2020.101490.
262. Theiler, M.; Endisch, C.; Lewerenz, M. Float Current Analysis for Fast Calendar Aging Assessment of 18650 Li(NiCoAl)O<sub>2</sub>/Graphite Cells. *Batteries* **2021**, *7*, 22. doi:10.3390/batteries7020022.
263. Li, Y.; Wei, Z.; Xiong, B.; Vilathgamuwa, D.M. Adaptive Ensemble-Based Electrochemical-Thermal-Degradation State Estimation of Lithium-Ion Batteries. *IEEE Trans. Ind. Electron.* **2021**, p. 1. doi:10.1109/TIE.2021.3095815.
264. Meissner, E.; Richter, G. Battery Monitoring and Electrical Energy Management. *J. Power Sources* **2003**, *116*, 79–98. doi:10.1016/S0378-7753(02)00713-9.
265. Farmann, A.; Sauer, D.U. A comprehensive review of on-board State-of-Available-Power prediction techniques for lithium-ion batteries in electric vehicles. *J. Power Sources* **2016**, *329*, 123–137. doi:10.1016/j.jpowsour.2016.08.031.
266. Sun, F.; Xiong, R.; He, H.; Li, W.; Aussems, J.E.E. Model-based dynamic multi-parameter method for peak power estimation of lithium-ion batteries. *Appl. Energy* **2012**, *96*, 378–386. doi:10.1016/j.apenergy.2012.02.061.
267. Xiong, R.; Sun, F.; He, H.; Nguyen, T.D. A data-driven adaptive state of charge and power capability joint estimator of lithium-ion polymer battery used in electric vehicles. *Energy* **2013**, *63*, 295–308. doi:10.1016/j.energy.2013.10.027.
268. Bhattacharya, S.; Bauer, P. Requirements for charging of an electric vehicle system based on state of power (SoP) and state of energy (SoE). In Proceedings of the 7th International Power Electronics and Motion Control Conference, Harbin, China, 2–5 June 2012; pp. 434–438. doi:10.1109/IPEMC.2012.6258900.
269. Bohlen, O.; Buller, S.; de Doncker, R.W.; Gelbke, M.; Naumann, R. Impedance based battery diagnosis for automotive applications. In Proceedings of the 2004 IEEE 35th Annual Power Electronics Specialists Conference (IEEE Cat. No.04CH37551), Aachen, Germany, 20–25 June 2004; IEEE: Piscataway, N.J, USA, 2004; pp. 2792–2797. doi:10.1109/PESC.2004.1355275.
270. Plett, G.L. High-Performance Battery-Pack Power Estimation Using a Dynamic Cell Model. *IEEE Trans. Veh. Technol.* **2004**, *53*, 1586–1593. doi:10.1109/TVT.2004.832408.
271. Küpper, M.; Hülshorst, T.; Seibert, D. Prädiktive Algorithmen für Lithium-Ionen-Traktionsbatterien in Elektro- und Hybridfahrzeugen. *ATZelektronik* **2011**, *6*, 70–78. doi:10.1365/s35658-011-0067-9.
272. Anderson, R.D.; Zhao, Y.; Wang, X.; Yang, X.G.; Li, Y. Real time battery power capability estimation. In Proceedings of the 2012 American Control Conference (ACC), Montreal, QC, Canada, 27–29 June 2012; pp. 592–597. doi:10.1109/ACC.2012.6314892.
273. Xiong, R.; He, H.; Sun, F.; Zhao, K. Online Estimation of Peak Power Capability of Li-Ion Batteries in Electric Vehicles by a Hardware-in-Loop Approach. *Energies* **2012**, *5*, 1455–1469. doi:10.3390/en5051455.
274. Fleischer, C.; Waag, W.; Bai, Z.; Sauer, D.U. Adaptive On-line State-of-available-power Prediction of Lithium-ion Batteries. *J. Power Electron.* **2013**, *13*, 516–527. doi:10.6113/JPE.2013.13.4.516.
275. Pei, L.; Zhu, C.; Wang, T.; Lu, R.; Chan, C.C. Online peak power prediction based on a parameter and state estimator for lithium-ion batteries in electric vehicles. *Energy* **2014**, *66*, 766–778. doi:10.1016/j.energy.2014.02.009.
276. Balagopal, B.; Chow, M.Y. The state of the art approaches to estimate the state of health (SOH) and state of function (SOF) of lithium Ion batteries. In Proceedings of the 2015 IEEE 13th International Conference on Industrial Informatics (INDIN), Cambridge, UK, 22–24 July 2015; pp. 1302–1307. doi:10.1109/INDIN.2015.7281923.
277. Xavier, M.A.; Trimboli, M.S. Lithium-ion battery cell-level control using constrained model predictive control and equivalent circuit models. *J. Power Sources* **2015**, *285*, 374–384. doi:10.1016/j.jpowsour.2015.03.074.
278. Burgos-Mellado, C.; Orchard, M.E.; Kazerani, M.; Cárdenas, R.; Sáez, D. Particle-filtering-based estimation of maximum available power state in Lithium-Ion batteries. *Appl. Energy* **2016**, *161*, 349–363. doi:10.1016/j.apenergy.2015.09.092.
279. Dong, G.; Wei, J.; Chen, Z. Kalman filter for onboard state of charge estimation and peak power capability analysis of lithium-ion batteries. *J. Power Sources* **2016**, *328*, 615–626. doi:10.1016/j.jpowsour.2016.08.065.
280. Malysz, P.; Ye, J.; Gu, R.; Yang, H.; Emadi, A. Battery State-of-Power Peak Current Calculation and Verification Using an Asymmetric Parameter Equivalent Circuit Model. *IEEE Trans. Veh. Technol.* **2016**, *65*, 4512–4522. doi:10.1109/TVT.2015.2443975.
281. Lelie, M.; Braun, T.; Knips, M.; Nordmann, H.; Ringbeck, F.; Zappen, H.; Sauer, D. Battery Management System Hardware Concepts: An Overview. *Appl. Sci.* **2018**, *8*, 534. doi:10.3390/app8040534.



282. Luca, R.; Whiteley, M.; Neville, T.; Tranter, T.; Weaving, J.; Marco, J.; Shearing, P.R.; Brett, D.J.L. Current Imbalance in Parallel Battery Strings Measured Using a Hall-Effect Sensor Array. *Energy Technol.* **2021**, *9*, 2001014. doi:10.1002/ente.202001014.
283. Schneider, D.; Vögele, U.; Endisch, C. Model-based sensor data fusion of quasi-redundant voltage and current measurements in a lithium-ion battery module. *J. Power Sources* **2019**, *440*, 227156. doi:10.1016/j.jpowsour.2019.227156.
284. Schneider, D.; Endisch, C. Robustness and Reliability of Model-based Sensor Data Fusion in a Lithium-Ion Battery System. In Proceedings of the 2020 IEEE Conference on Control Technology and Applications (CCTA), Montreal, QC, Canada, 24–26 August 2020. doi:10.1109/CCTA41146.2020.9206336.
285. Ripka, P. Contactless measurement of electric current using magnetic sensors. *tm-Tech. Mess.* **2019**, *86*, 586–598. doi:10.1515/teme-2019-0032.
286. Silvio Ziegler.; Robert C. Woodward.; Herbert Ho-Ching Iu.; Lawrence J. Borle. Current Sensing Techniques: A Review. *IEEE Sens. J.* **2009**, *86*, 354–376. doi:10.1109/JSEN.2009.2013914.
287. Patel, A.; Ferdowsi, M. Current Sensing for Automotive Electronics—A Survey. *IEEE Trans. Veh. Technol.* **2009**, *58*, 4108–4119. doi:10.1109/TVT.2009.2022081.
288. Takaya, H.; Miyagi, K.; Hamada, K. Current-sensing power MOSFETs with excellent temperature characteristics. In Proceedings of the 2009 21st International Symposium on Power Semiconductor Devices & IC's, Barcelona, Spain, 14–18 June 2009; pp. 73–76. doi:10.1109/ISPSD.2009.5158004.
289. Meddings, N.; Heinrich, M.; Overney, F.; Lee, J.S.; Ruiz, V.; Napolitano, E.; Seitz, S.; Hinds, G.; Raccichini, R.; Gaberšček, M.; et al. Application of electrochemical impedance spectroscopy to commercial Li-ion cells: A review. *J. Power Sources* **2020**, *480*, 228742. doi:10.1016/j.jpowsour.2020.228742.
290. Gong, Z.; Liu, Z.; Wang, Y.; Gupta, K.; da Silva, C.; Liu, T.; Zheng, Z.H.; Zhang, W.P.; van Lammeren, J.P.M.; Bergveld, H.J.; et al. IC for online EIS in automotive batteries and hybrid architecture for high-current perturbation in low-impedance cells. In Proceedings of the APEC 2018, San Antonio, TX, USA, 4–8 March 2018; IEEE: Piscataway, NJ, USA, 2018; pp. 1922–1929. doi:10.1109/APEC.2018.8341280.
291. Alavi, S.; Birkel, C.R.; Howey, D.A. Time-domain fitting of battery electrochemical impedance models. *J. Power Sources* **2015**, *288*, 345–352. doi:10.1016/j.jpowsour.2015.04.099.
292. Depernet, D.; Ba, O.; Berthon, A. Online impedance spectroscopy of lead acid batteries for storage management of a standalone power plant. *J. Power Sources* **2012**, *219*, 65–74. doi:10.1016/j.jpowsour.2012.07.053.
293. Liebhart, B.; Diehl, S.; Schneider, D.; Endisch, C.; Kennel, R. Enhancing the Cell Impedance Estimation of a Lithium-Ion Battery System with Embedded Power Path Switches. In Proceedings of the 2021 IEEE Applied Power Electronics Conference and Exposition (APEC), Phoenix, AZ, USA, 14–17 June 2021; pp. 967–974. doi:10.1109/APEC42165.2021.9487173.
294. Liebhart, B.; Diehl, S.; Schmid, M.; Endisch, C.; Kennel, R. Improved Impedance Measurements for Electric Vehicles with Reconfigurable Battery Systems. In Proceedings of the 2021 IEEE 12th Energy Conversion Congress & Exposition-Asia (ECCE-Asia), Singapore, 24–27 May 2021; pp. 1736–1742. doi:10.1109/ECCE-Asia49820.2021.9479060.
295. Sihvo, J.; Messo, T.; Roinila, T.; Luhtala, R. Online Internal Impedance Measurements of Li-ion Battery Using PRBS Broadband Excitation and Fourier Techniques: Methods and Injection Design. In *Power Electronics for Sustainable Society*; IEEE: Piscataway, NJ, USA, 2018; pp. 2470–2475. doi:10.23919/IPEC.2018.8507565.
296. Din, E.; Schaef, C.; Moffat, K.; Stauth, J.T. A Scalable Active Battery Management System With Embedded Real-Time Electrochemical Impedance Spectroscopy. *IEEE Trans. Power Electron.* **2017**, *32*, 5688–5698. doi:10.1109/TPEL.2016.2607519.
297. Piret, H.; Portier, B.; Bacquet, S.; Palmieri, M.; Granjon, P.; Guillet, N.; Cattin, V. Key parameters design for online battery electrochemical impedance tracker. In Proceedings of the European Battery, Hybrid and Fuel Cell Electric Vehicle Congress, Brussels, Belgium, 1–4 December 2015.
298. Yao, Q.; Lu, D.; Lei, G. Battery Impedance Measurement Using Fast Square Current Perturbation. In Proceedings of the 2019 IEEE 4th International Future Energy Electronics Conference (IFEEEC), Singapore, 25–28 November 2019; pp. 1–5. doi:10.1109/IFEEEC47410.2019.9015099.
299. Koch, R.; Kuhn, R.; Zilberman, I.; Jossen, A. Electrochemical impedance spectroscopy for online battery monitoring-power electronics control. In Proceedings of the 2014 16th European Conference on Power Electronics and Applications, Lappeenranta, Finland, 26–28 August 2014; pp. 1–10. doi:10.1109/EPE.2014.6910907.
300. Nguyen, T.T.; Doan, V.T.; Lee, G.H.; Kim, H.W.; Choi, W.; Kim, D.W. Development of an Intelligent Charger with a Battery Diagnosis Function Using Online Impedance Spectroscopy. *J. Power Electron.* **2016**, *16*, 1981–1989. doi:10.6113/JPE.2016.16.5.1981.
301. Ferrero, R.; Wu, C.; Carboni, A.; Toscani, S.; de Angelis, M.; George-Williams, H.; Patelli, E.; Pegoraro, P.A. Low-Cost Battery Monitoring by Converter-Based Electrochemical Impedance Spectroscopy. In Proceedings of the 2017 IEEE International Workshop on Applied Measurements for Power Systems (AMPS), Liverpool, UK, 20–22 September 2017; pp. 1–6. doi:10.1109/AMPS.2017.8078334.
302. Moore, S.; Barendse, P. Online condition monitoring of lithium-ion batteries using impedance spectroscopy. In Proceedings of the ECCE 2017, Cincinnati, OH, USA, 1–5 October 2017; IEEE: Piscataway, NJ, USA, 2017; pp. 5617–5624. doi:10.1109/ECCE.2017.8096935.
303. Hong, P.; Jiang, H.; Li, J.q.; Xu, L.; Ouyang, M. Modeling and Experiment Validation of the DC/DC Converter for Online AC Impedance Identification of the Lithium-Ion Battery. *SAE Int. J. Altern. Powertrains* **2017**, *6*, 233–245. doi:10.4271/2017-01-1198.

304. Qahouq, J.A.A.; Xia, Z. Single-Perturbation-Cycle Online Battery Impedance Spectrum Measurement Method With Closed-Loop Control of Power Converter. *IEEE Trans. Ind. Electron.* **2017**, *64*, 7019–7029. doi:10.1109/TIE.2017.2686324.
305. Piret, H.; Sockeel, N.; Heiries, V.; Michel, P.H.; Ranieri, M.; Cattin, V.; Guillet, N.; Granjon, P. Passive and active tracking of electrochemical impedance of a drone battery. In Proceedings of the European Battery, Hybrid and Fuel Cell Electric Vehicle Congress, Brussels, Belgium, 1–4 December 2015.
306. Sockeel, N.; Ball, J.; Shahverdi, M.; Mazzola, M. Passive Tracking of the Electrochemical Impedance of a Hybrid Electric Vehicle Battery and State of Charge Estimation through an Extended and Unscented Kalman Filter. *Batteries* **2018**, *4*, 52. doi:10.3390/batteries4040052.
307. Lohmann, N.; Haussmann, P.; Wesskamp, P.; Melbert, J.; Musch, T. Employing Real Automotive Driving Data for Electrochemical Impedance Spectroscopy on Lithium-Ion Cells. *SAE Int. J. Altern. Powertrains* **2015**, *4*, 308–317. doi:10.4271/2015-01-1187.
308. Lohmann, N.; Weßkamp, P.; Haußmann, P.; Melbert, J.; Musch, T. Electrochemical impedance spectroscopy for lithium-ion cells: Test equipment and procedures for aging and fast characterization in time and frequency domain. *J. Power Sources* **2015**, *273*, 613–623. doi:10.1016/j.jpowsour.2014.09.132.
309. Mingant, R.; Bernard, J.; Sauvart-Moynot, V. Towards Onboard Li-ion Battery State-of-health Diagnosis by a Virtual Sensor. *World Electr. Veh. J.* **2012**, *5*, 405–411. doi:10.3390/wevj5020405.
310. Roscher, V.; Schneider, M.; Durdaut, P.; Sassano, N.; Pereguda, S.; Mense, E.; Riemschneider, K.R. Synchronisation using wireless trigger-broadcast for impedance spectroscopy of battery cells. In Proceedings of the 2015 IEEE Sensors Applications Symposium (SAS), Zadar, Croatia, 13–15 April 2015; IEEE: Piscataway, NJ, USA, 2015; pp. 1–6. doi:10.1109/SAS.2015.7133608.
311. Wei, X.; Wang, X.; Dai, H. Practical On-Board Measurement of Lithium Ion Battery Impedance Based on Distributed Voltage and Current Sampling. *Energies* **2018**, *11*, 64. doi:10.3390/en11010064.
312. Zhang, L.; Zhou, Z.; Chen, Q.; Long, R.; Quan, S. Model Predictive Control for Electrochemical Impedance Spectroscopy Measurement of Fuel Cells Based on Neural Network Optimization. *IEEE Trans. Transp. Electr.* **2019**, *5*, 524–534. doi:10.1109/TTE.2019.2909687.
313. Ivanisevic, N.; Rodriguez, S.; Rusu, A. Impedance Spectroscopy Based on Linear System Identification. *IEEE Trans. Biomed. Circuits Syst.* **2019**, *13*, 396–402. doi:10.1109/TBCAS.2019.2900584.
314. Kuipers, M.; Schröer, P.; Nemeth, T.; Zappen, H.; Blömeke, A.; Sauer, D.U. An Algorithm for an Online Electrochemical Impedance Spectroscopy and Battery Parameter Estimation: Development, Verification and Validation. *J. Energy Storage* **2020**, *30*, 101517. doi:10.1016/j.est.2020.101517.
315. Piret, H.; Granjon, P.; Guillet, N.; Cattin, V. Tracking of electrochemical impedance of batteries. *J. Power Sources* **2016**, *312*, 60–69. doi:10.1016/j.jpowsour.2016.02.006.
316. Zappen, H.; Ringbeck, F.; Sauer, D. Application of Time-Resolved Multi-Sine Impedance Spectroscopy for Lithium-Ion Battery Characterization. *Batteries* **2018**, *4*, 64. doi:10.3390/BATTERIES4040064.
317. Schmidt, J.P.; Ivers-Tiffée, E. Pulse-fitting—A novel method for the evaluation of pulse measurements, demonstrated for the low frequency behavior of lithium-ion cells. *J. Power Sources* **2016**, *315*, 316–323. doi:10.1016/j.jpowsour.2016.03.026.
318. Barsoukov, E.; Ryu, S.H.; Lee, H. A novel impedance spectrometer based on carrier function Laplace-transform of the response to arbitrary excitation. *J. Electroanal. Chem.* **2002**, *536*, 109–122. doi:10.1016/S0022-0728(02)01209-3.
319. Klotz, D.; Schönleber, M.; Schmidt, J.P.; Ivers-Tiffée, E. New approach for the calculation of impedance spectra out of time domain data. *Electrochim. Acta* **2011**, *56*, 8763–8769. doi:10.1016/j.electacta.2011.07.096.
320. Yokoshima, T.; Mukoyama, D.; Nara, H.; Maeda, S.; Nakazawa, K.; Momma, T.; Osaka, T. Impedance Measurements of Kilowatt-Class Lithium Ion Battery Modules/Cubicles in Energy Storage Systems by Square-Current Electrochemical Impedance Spectroscopy. *Electrochim. Acta* **2017**, *246*, 800–811. doi:10.1016/j.electacta.2017.05.076.
321. Carbonnier, H.; Barde, H.; Riga, L.; Carre, A. Electrochemical Impedance Spectroscopy for Online Satellite Battery Monitoring Using Square Wave Excitation. In Proceedings of the 2019 European Space Power Conference (ESPC), Juan-les-Pins, France, 30 September–4 October 2019; pp. 1–6. doi:10.1109/ESPC.2019.8932028.
322. Osaka, T.; Naoi, K. Application of On-line Impedance Measurement Using Fast Fourier Transform to Electrochemical Systems. *Bull. Chem. Soc. Jpn.* **1982**, *55*, 36–40. doi:10.1246/bcsj.55.36.
323. Kamat, R.K.; Naik, G.M. Thermistors—In search of new applications, manufacturers cultivate advanced NTC techniques. *Sens. Rev.* **2002**, *22*, 334–340. doi:10.1108/02602280210444654.
324. Cao, J.; Emadi, A. Batteries Need Electronics. *IEEE Ind. Electron. Mag.* **2011**, *5*, 27–35. doi:10.1109/MIE.2011.940251.
325. Anthony, D.; Wong, D.; Wetz, D.; Jain, A. Non-invasive measurement of internal temperature of a cylindrical Li-ion cell during high-rate discharge. *Int. J. Heat Mass Transf.* **2017**, *111*, 223–231. doi:10.1016/j.ijheatmasstransfer.2017.03.095.
326. Drake, S.J.; Martin, M.; Wetz, D.A.; Ostanek, J.K.; Miller, S.P.; Heinzel, J.M.; Jain, A. Heat generation rate measurement in a Li-ion cell at large C-rates through temperature and heat flux measurements. *J. Power Sources* **2015**, *285*, 266–273. doi:10.1016/j.jpowsour.2015.03.008.
327. Childs, P.R.N.; Greenwood, J.R.; Long, C.A. Review of temperature measurement. *Rev. Sci. Instrum.* **2000**, *71*, 2959–2978. doi:10.1063/1.1305516.
328. Wang, S.; Li, K.; Tian, Y.; Wang, J.; Wu, Y.; Ji, S. Infrared imaging investigation of temperature fluctuation and spatial distribution for a large laminated lithium-ion power battery. *Appl. Therm. Eng.* **2019**, *152*, 204–214. doi:10.1016/j.applthermaleng.2019.02.096.

329. White, D.R.; Galleano, R.; Actis, A.; Brixy, H.; de Groot, M.; Dubbeldam, J.; Reesink, A.L.; Edler, F.; Sakurai, H.; Shepard, R.L.; Gallop, J.C. The status of Johnson noise thermometry. *Metrologia* **1996**, *33*, 325–335. doi:10.1088/0026-1394/33/4/6.
330. Liu, X.; Zheng, C.; Liu, C.; Pong, P.W.T. Experimental Investigation of a Johnson Noise Thermometry Using GMR Sensor for Electric Vehicle Applications. *IEEE Sens. J.* **2018**, *18*, 3098–3107. doi:10.1109/JSEN.2018.2805309.
331. Fleming, J.; Amietszajew, T.; Charmet, J.; Roberts, A.J.; Greenwood, D.; Bhagat, R. The design and impact of in-situ and operando thermal sensing for smart energy storage. *J. Energy Storage* **2019**, *22*, 36–43. doi:10.1016/j.est.2019.01.026.
332. Zhang, G.; Cao, L.; Ge, S.; Wang, C.Y.; Shaffer, C.E.; Rahn, C.D. Reaction temperature sensing (RTS)-based control for Li-ion battery safety. *Sci. Rep.* **2015**, *5*, 18237. doi:10.1038/srep18237.
333. Zhu, S.; Han, J.; An, H.Y.; Pan, T.S.; Wei, Y.M.; Song, W.L.; Chen, H.S.; Fang, D. A novel embedded method for in-situ measuring internal multi-point temperatures of lithium ion batteries. *J. Power Sources* **2020**, *456*, 227981. doi:10.1016/j.jpowsour.2020.227981.
334. Mutyala, M.S.K.; Zhao, J.; Li, J.; Pan, H.; Yuan, C.; Li, X. In-situ temperature measurement in lithium ion battery by transferable flexible thin film thermocouples. *J. Power Sources* **2014**, *260*, 43–49. doi:10.1016/j.jpowsour.2014.03.004.
335. Martiny, N.; Rheinfeld, A.; Geder, J.; Wang, Y.; Kraus, W.; Jossen, A. Development of an All Kapton-Based Thin-Film Thermocouple Matrix for In Situ Temperature Measurement in a Lithium Ion Pouch Cell. *IEEE Sens. J.* **2014**, *14*, 3377–3384. doi:10.1109/JSEN.2014.2331996.
336. Martiny, N.; Geder, J.; Wang, Y.; Kraus, W.; Jossen, A. Development of a thin-film thermocouple matrix for in-situ temperature measurement in a lithium ion pouch cell. In Proceedings of the IEEE Sensors, Baltimore, MD, USA, 3–6 November 2013; IEEE: Piscataway, NJ, USA, 2013; pp. 1–4. doi:10.1109/ICSENS.2013.6688485.
337. Charmet, J.; Bitterli, J.; Sereda, O.; Liley, M.; Renaud, P.; Keppner, H. Optimizing Parylene C Adhesion for MEMS Processes: Potassium Hydroxide Wet Etching. *J. Microelectromech. Syst.* **2013**, *22*, 855–864. doi:10.1109/JMEMS.2013.2248126.
338. Raghavan, A.; Kiesel, P.; Sommer, L.W.; Schwartz, J.; Lochbaum, A.; Hegyi, A.; Schuh, A.; Arakaki, K.; Saha, B.; Ganguli, A.; et al. Embedded fiber-optic sensing for accurate internal monitoring of cell state in advanced battery management systems part 1: Cell embedding method and performance. *J. Power Sources* **2017**, *341*, 466–473. doi:10.1016/j.jpowsour.2016.11.104.
339. Oh, K.Y.; Epureanu, B.I. A novel thermal swelling model for a rechargeable lithium-ion battery cell. *J. Power Sources* **2016**, *303*, 86–96. doi:10.1016/j.jpowsour.2015.10.085.
340. Oh, K.Y.; Epureanu, B.I.; Siegel, J.B.; Stefanopoulou, A.G. Phenomenological force and swelling models for rechargeable lithium-ion battery cells. *J. Power Sources* **2016**, *310*, 118–129. doi:10.1016/j.jpowsour.2016.01.103.
341. Rieger, B.; Schlueter, S.; Erhard, S.V.; Schmalz, J.; Reinhart, G.; Jossen, A. Multi-scale investigation of thickness changes in a commercial pouch type lithium-ion battery. *J. Energy Storage* **2016**, *6*, 213–221. doi:10.1016/j.est.2016.01.006.
342. Kim, Y.; Mohan, S.; Samad, N.A.; Siegel, J.B.; Stefanopoulou, A.G. Optimal power management for a series hybrid electric vehicle cognizant of battery mechanical effects. In Proceedings of the 2014 American Control Conference, Portland, OR, USA, 4–6 June 2014; pp. 3832–3837. doi:10.1109/ACC.2014.6859505.
343. Popp, H.; Koller, M.; Jahn, M.; Bergmann, A. Mechanical methods for state determination of Lithium-Ion secondary batteries: A review. *J. Energy Storage* **2020**, *32*, 101859. doi:10.1016/j.est.2020.101859.
344. Cheng, X.; Pecht, M. In Situ stress measurement techniques on li-ion battery electrodes: A review. *Energies* **2017**, *10*, 591.
345. Knobloch, A.; Kapusta, C.; Karp, J.; Plotnikov, Y.; Siegel, J.B.; Stefanopoulou, A.G. Fabrication of Multimeasurand Sensor for Monitoring of a Li-Ion Battery. *J. Electron. Packag.* **2018**, *140*, 031002. doi:10.1115/1.4039861.
346. Knobloch, A.; Karp, J.; Plotnikov, Y.; Kapusta, C.; Siegel, J.; Samad, N.; Stefanopoulou, A. Novel thin temperature and expansion sensors for li-ion battery monitoring. In Proceedings of the 2017 IEEE SENSORS, Glasgow, UK, 29 October–1 November 2017; pp. 1–3. doi:10.1109/ICSENS.2017.8234066.
347. Kinet, D.; Mégret, P.; Goossen, K.W.; Qiu, L.; Heider, D.; Caucheteur, C. Fiber Bragg grating sensors toward structural health monitoring in composite materials: Challenges and solutions. *Sensors* **2014**, *14*, 7394–7419. doi:10.3390/s140407394.
348. Fleming, J.; Amietszajew, T.; McTurk, E.; Towers, D.P.; Greenwood, D.; Bhagat, R. Development and evaluation of in-situ instrumentation for cylindrical Li-ion cells using fibre optic sensors. *HardwareX* **2018**, *3*, 100–109. doi:10.1016/j.ohx.2018.04.001.
349. McTurk, E.; Amietszajew, T.; Fleming, J.; Bhagat, R. Thermo-electrochemical instrumentation of cylindrical Li-ion cells. *J. Power Sources* **2018**, *379*, 309–316. doi:10.1016/j.jpowsour.2018.01.060.
350. Amietszajew, T.; McTurk, E.; Fleming, J.; Bhagat, R. Understanding the limits of rapid charging using instrumented commercial 18650 high-energy Li-ion cells. *Electrochim. Acta* **2018**, *263*, 346–352. doi:10.1016/j.electacta.2018.01.076.
351. Finegan, D.P.; Darcy, E.; Keyser, M.; Tjaden, B.; Heenan, T.M.M.; Jervis, R.; Bailey, J.J.; Vo, N.T.; Magdysyuk, O.V.; Drakopoulos, M.; Di Michiel, M.; Rack, A.; Hinds, G.; Brett, D.J.L.; Shearing, P.R. Identifying the Cause of Rupture of Li-Ion Batteries during Thermal Runaway. *Adv. Sci.* **2018**, *5*, 1700369. doi:10.1002/advs.201700369.
352. Nascimento, M.; Ferreira, M.; Pinto, J. Simultaneous Sensing of Temperature and Bi-Directional Strain in a Prismatic Li-Ion Battery. *Batteries* **2018**, *4*, 23. doi:10.3390/batteries4020023.
353. Nascimento, M.; Novais, S.; Ding, M.S.; Ferreira, M.S.; Koch, S.; Passerini, S.; Pinto, J.L. Internal strain and temperature discrimination with optical fiber hybrid sensors in Li-ion batteries. *J. Power Sources* **2019**, *410–411*, 1–9. doi:10.1016/j.jpowsour.2018.10.096.
354. Peng, J.; Zhou, X.; Jia, S.; Jin, Y.; Xu, S.; Chen, J. High precision strain monitoring for lithium ion batteries based on fiber Bragg grating sensors. *J. Power Sources* **2019**, *433*, 226692. doi:10.1016/j.jpowsour.2019.226692.
355. Nascimento, M.; Ferreira, M.S.; Pinto, J.L. Real time thermal monitoring of lithium batteries with fiber sensors and thermocouples: A comparative study. *Measurement* **2017**, *111*, 260–263. doi:10.1016/j.measurement.2017.07.049.

356. Bae, C.J.; Manandhar, A.; Kiesel, P.; Raghavan, A. Monitoring the Strain Evolution of Lithium-Ion Battery Electrodes using an Optical Fiber Bragg Grating Sensor. *Energy Technol.* **2016**, *4*, 851–855. doi:10.1002/ente.201500514.
357. Nedjalkov, A.; Meyer, J.; Gräfenstein, A.; Schramm, B.; Angelmahr, M.; Schwenzel, J.; Schade, W. Refractive Index Measurement of Lithium Ion Battery Electrolyte with Etched Surface Cladding Waveguide Bragg Gratings and Cell Electrode State Monitoring by Optical Strain Sensors. *Batteries* **2019**, *5*, 30. doi:10.3390/batteries5010030.
358. Fortier, A.; Tsao, M.; Williard, N.; Xing, Y.; Pecht, M. Preliminary Study on Integration of Fiber Optic Bragg Grating Sensors in Li-Ion Batteries and In Situ Strain and Temperature Monitoring of Battery Cells. *Energies* **2017**, *10*, 838. doi:10.3390/en10070838.
359. Novais, S.; Nascimento, M.; Grande, L.; Domingues, M.F.; Antunes, P.; Alberto, N.; Leitão, C.; Oliveira, R.; Koch, S.; Kim, G.T.; Passerini, S.; Pinto, J. Internal and External Temperature Monitoring of a Li-Ion Battery with Fiber Bragg Grating Sensors. *Sensors* **2016**, *16*, 1394. doi:10.3390/s16091394.
360. Ghannoum, A.; Iyer, K.; Nieva, P.; Khajepour, A. Fiber optic monitoring of lithium-ion batteries: A novel tool to understand the lithiation of batteries. In Proceedings of the IEEE SENSORS 2016, Orlando, FL, USA, 30 October–3 November 2016; IEEE: Piscataway, NJ, USA, 2016; pp. 1–3. doi:10.1109/ICSENS.2016.7808695.
361. Ghannoum, A.; Nieva, P. Graphite lithiation and capacity fade monitoring of lithium ion batteries using optical fibers. *J. Energy Storage* **2020**, *28*, 101233. doi:10.1016/j.est.2020.101233.
362. Le Yang, C.; Chen, H.S.; Song, W.L.; Fang, D. Effect of Defects on Diffusion Behaviors of Lithium-Ion Battery Electrodes: In Situ Optical Observation and Simulation. *ACS Appl. Mater. Interfaces* **2018**, *10*, 43623–43630. doi:10.1021/acsami.8b15260.
363. Davies, G.; Knehr, K.W.; van Tassell, B.; Hodson, T.; Biswas, S.; Hsieh, A.G.; Steingart, D.A. State of charge and state of health estimation using electrochemical acoustic time of flight analysis. *J. Electrochem. Soc.* **2017**, *164*, A2746. doi:10.1149/2.1411712jes.
364. Hsieh, A.G.; Bhadra, S.; Hertzberg, B.J.; Gjeltrema, P.J.; Goy, A.; Fleischer, J.W.; Steingart, D.A. Electrochemical-acoustic time of flight: In operando correlation of physical dynamics with battery charge and health. *Energy Environ. Sci.* **2015**, *8*, 1569–1577. doi:10.1039/C5EE00111K.
365. Robinson, J.B.; Maier, M.; Alster, G.; Compton, T.; Brett, D.J.L.; Shearing, P.R. Spatially resolved ultrasound diagnostics of Li-ion battery electrodes. *Phys. Chem. Chem. Phys.* **2019**, *21*, 6354–6361. doi:10.1039/C8CP07098A.
366. Gold, L.; Bach, T.; Virsik, W.; Schmitt, A.; Müller, J.; Staab, T.E.; Sextl, G. Probing lithium-ion batteries' state-of-charge using ultrasonic transmission—Concept and laboratory testing. *J. Power Sources* **2017**, *343*, 536–544. doi:10.1016/j.jpowsour.2017.01.090.
367. Robinson, J.B.; Pham, M.; Kok, M.D.; Heenan, T.M.; Brett, D.J.; Shearing, P.R. Examining the Cycling Behaviour of Li-Ion Batteries Using Ultrasonic Time-of-Flight Measurements. *J. Power Sources* **2019**, *444*, 227318. doi:10.1016/j.jpowsour.2019.227318.
368. Sood, B.; Osterman, M.; Pecht, M. Health monitoring of lithium-ion batteries. In Proceedings of the 10th Annual IEEE Symposium on Product Compliance Engineering ISPCE, Austin, TX, USA, 7–9 October 2013; pp. 1–6. doi:10.1109/ISPCE.2013.6664165.
369. Zappen, H.; Fuchs, G.; Gitis, A.; Sauer, D.U. In-Operando Impedance Spectroscopy and Ultrasonic Measurements during High-Temperature Abuse Experiments on Lithium-Ion Batteries. *Batteries* **2020**, *6*, 25. doi:10.3390/batteries6020025.
370. Ladpli, P.; Kopsaftopoulos, F.; Chang, F.K. Estimating state of charge and health of lithium-ion batteries with guided waves using built-in piezoelectric sensors/actuators. *J. Power Sources* **2018**, *384*, 342–354. doi:10.1016/j.jpowsour.2018.02.056.
371. Chang, J.J.; Zeng, X.F.; Wan, T.L. Real-time measurement of lithium-ion batteries' state-of-charge based on air-coupled ultrasound. *AIP Adv.* **2019**, *9*, 085116. doi:10.1063/1.5108873.
372. Muhammad, S.; Rafique, M.U.; Li, S.; Shao, Z.; Wang, Q.; Liu, X. Reconfigurable Battery Systems. *ACM Trans. Des. Autom. Electron. Syst.* **2019**, *24*, 1–27. doi:10.1145/3301301.
373. Ci, S.; Lin, N.; Wu, D. Reconfigurable Battery Techniques and Systems: A Survey. *IEEE Access* **2016**, *4*, 1175–1189. doi:10.1109/ACCESS.2016.2545338.
374. Helling, F.; Glück, J.; Singer, A.; Pfisterer, H.J.; Weyh, T. The AC battery—A novel approach for integrating batteries into AC systems. *Int. J. Electr. Power Energy Syst.* **2019**, *104*, 150–158. doi:10.1016/j.ijepes.2018.06.047.
375. Kim, T.; Qiao, W.; Qu, L. A series-connected self-reconfigurable multicell battery capable of safe and effective charging/discharging and balancing operations. In Proceedings of the 2012 Twenty-Seventh Annual IEEE Applied Power Electronics Conference and Exposition (APEC), Orlando, FL, USA, 5–9 February 2012; pp. 2259–2264. doi:10.1109/APEC.2012.6166137.
376. He, L.; Yang, Z.; Gu, Y.; Liu, C.; He, T.; Shin, K.G. SoH-Aware Reconfiguration in Battery Packs. *IEEE Trans. Smart Grid* **2018**, *9*, 3727–3735. doi:10.1109/TSG.2016.2639445.
377. Kim, T.; Qiao, W.; Qu, L. Power Electronics-Enabled Self-X Multicell Batteries: A Design Toward Smart Batteries. *IEEE Trans. Power Electron.* **2012**, *27*, 4723–4733. doi:10.1109/TPEL.2012.2183618.
378. Kim, T.; Qiao, W.; Qu, L. A multicell battery system design for electric and plug-in hybrid electric vehicles. In Proceedings of the 2012 IEEE International Electric Vehicle Conference, Greenville, SC, USA, 4–8 March 2012; pp. 1–7. doi:10.1109/IEVC.2012.6183240.
379. Manenti, A.; Abba, A.; Merati, A.; Savaresi, S.M.; Geraci, A. A New BMS Architecture Based on Cell Redundancy. *IEEE Trans. Ind. Electron.* **2011**, *58*, 4314–4322. doi:10.1109/TIE.2010.2095398.
380. Tolbert, L.A.; Peng, F.Z.; Cunyningham, T.; Chiasson, J.N. Charge balance control schemes for cascade multilevel converter in hybrid electric vehicles. *IEEE Trans. Ind. Electron.* **2002**, *49*, 1058–1064. doi:10.1109/TIE.2002.803213.
381. Zhu, Q.; Dai, W.; Guan, L.; Tan, X.; Li, Z.; Xie, D. A Fault-Tolerant Control Strategy of Modular Multilevel Converter with Sub-Module Faults Based on Neutral Point Compound Shift. *Energies* **2019**, *12*, 876. doi:10.3390/en12050876.
382. Venkataramanaiah, J.; Suresh, Y.; Panda, A.K. A review on symmetric, asymmetric, hybrid and single DC sources based multilevel inverter topologies. *Renew. Sustain. Energy Rev.* **2017**, *76*, 788–812. doi:10.1016/j.rser.2017.03.066.

383. Chen, Z.; Lin, F.; Wang, C.; Le Wang, Y.; Xu, M. Active Diagnosability of Discrete Event Systems and its Application to Battery Fault Diagnosis. *IEEE Trans. Control Syst. Technol.* **2014**, *22*, 1892–1898. doi:10.1109/TCST.2013.2291069.
384. Lezana, P.; Pou, J.; Meynard, T.A.; Rodriguez, J.; Ceballos, S.; Richardeau, F. Survey on Fault Operation on Multilevel Inverters. *IEEE Trans. Ind. Electron.* **2010**, *57*, 2207–2218. doi:10.1109/TIE.2009.2032194.
385. Maharjan, L.; Yamagishi, T.; Akagi, H.; Asakura, J. Fault-tolerant control for a battery energy storage system based on a cascade PWM converter. In Proceedings of the IEEE 6th International Power Electronics and Motion Control Conference, Wuhan, China, 17–20 May 2009; IEEE: Piscataway, NJ, USA, 2009; pp. 945–950. doi:10.1109/IPEMC.2009.5157519.
386. Kleiner, J.; Lechermann, L.; Komsiyiska, L.; Elger, G.; Endisch, C. Thermal Effects of Bad-Block-Management in an Intelligent Automotive Lithium-ion Battery Module based on lumped 3D Electro-Thermal Modeling. In Proceedings of the 2021 IEEE Transportation Electrification Conference & Expo (ITEC), Chicago, IL, USA, 21–25 June 2021.
387. Konstantinou, G.; Pou, J.; Ceballos, S.; Agelidis, V.G. Active Redundant Submodule Configuration in Modular Multilevel Converters. *IEEE Trans. Power Deliv.* **2013**, *28*, 2333–2341. doi:10.1109/TPWRD.2013.2264950.
388. Liu, G.; Xu, Z.; Xue, Y.; Tang, G. Optimized Control Strategy Based on Dynamic Redundancy for the Modular Multilevel Converter. *IEEE Trans. Power Electron.* **2015**, *30*, 339–348. doi:10.1109/TPEL.2014.2305663.
389. Zhang, W.; Xu, D.; Enjeti, P.N.; Li, H.; Hawke, J.T.; Krishnamoorthy, H.S. Survey on Fault-Tolerant Techniques for Power Electronic Converters. *IEEE Trans. Power Electron.* **2014**, *29*, 6319–6331. doi:10.1109/TPEL.2014.2304561.
390. Hammond, P.W. Enhancing the reliability of modular medium-voltage drives. *IEEE Trans. Ind. Electron.* **2002**, *49*, 948–954. doi:10.1109/TIE.2002.803172.
391. Yu, Y.; Konstantinou, G.; Townsend, C.D.; Agelidis, V.G. Comparison of zero-sequence injection methods in cascaded H-bridge multilevel converters for large-scale photovoltaic integration. *IET Renew. Power Gener.* **2017**, *11*, 603–613. doi:10.1049/iet-rpg.2016.0621.
392. Lezana, P.; Ortiz, G. Extended Operation of Cascade Multicell Converters Under Fault Condition. *IEEE Trans. Ind. Electron.* **2009**, *56*, 2697–2703. doi:10.1109/TIE.2009.2019771.
393. Herzog, M.; Ebentheuer, A.W.; Lahlou, T.; Herzog, H.G. Management Algorithms for Cascaded H-Bridge Multilevel Inverters. In Proceedings of the 2018 53rd International Universities Power Engineering Conference (UPEC2018), Glasgow, UK, 4–7 September 2018; pp. 1–6. doi:10.1109/UPEC.2018.8542005.
394. Kim, S.M.; Lee, J.S.; Lee, K.B. Fault-tolerant strategy using neutral-shift method for cascaded multilevel inverters based on level-shifted PWM. In Proceedings of the 2015 9th International Conference on Power Electronics and ECCE Asia (ICPE-ECCE Asia), Seoul, Korea, 1–5 June 2015; IEEE: Piscataway, NJ, USA, 2015; pp. 1327–1332. doi:10.1109/ICPE.2015.7167951.
395. Daowd, M.; Omar, N.; van den Bossche, P.; van Mierlo, J. Passive and active battery balancing comparison based on MATLAB simulation. In Proceedings of the IEEE Vehicle Power and Propulsion Conference (VPPC), Chicago, IL, USA, 6–9 September 2011; IEEE: Piscataway, NJ, USA, 2011; pp. 1–7. doi:10.1109/VPPC.2011.6043010.
396. Aizpuru, I.; Iraola, U.; Canales, J.M.; Unamuno, E.; Gil, I. Battery pack tests to detect unbalancing effects in series connected Li-ion cells. In Proceedings of the International Conference on Clean Electrical Power (ICCEP), Alghero, Italy, 11–13 June 2013; IEEE: Piscataway, NJ, USA, 2013; pp. 99–106. doi:10.1109/ICCEP.2013.6586974.
397. Santhanagopalan, S.; White, R.E. Quantifying Cell-to-Cell Variations in Lithium Ion Batteries. *Int. J. Electrochem.* **2012**, *2012*, 1–10. doi:10.1155/2012/395838.
398. Baumhöfer, T.; Brühl, M.; Rothgang, S.; Sauer, D.U. Production caused variation in capacity aging trend and correlation to initial cell performance. *J. Power Sources* **2014**, *247*, 332–338. doi:10.1016/j.jpowsour.2013.08.108.
399. Schuster, S.F.; Brand, M.J.; Berg, P.; Gleissenberger, M.; Jossen, A. Lithium-ion cell-to-cell variation during battery electric vehicle operation. *J. Power Sources* **2015**, *297*, 242–251. doi:10.1016/j.jpowsour.2015.08.001.
400. Gao, Z.C.; Chin, C.S.; Toh, W.D.; Chiew, J.; Jia, J. State-of-Charge Estimation and Active Cell Pack Balancing Design of Lithium Battery Power System for Smart Electric Vehicle. *J. Adv. Transp.* **2017**, *2017*, 1–14. doi:10.1155/2017/6510747.
401. Ricco, M.; Meng, J.; Gherman, T.; Grandi, G.; Teodorescu, R. Smart Battery Pack for Electric Vehicles Based on Active Balancing with Wireless Communication Feedback. *Energies* **2019**, *12*, 3862. doi:10.3390/en12203862.
402. Cao, J.; Schofield, N.; Emadi, A. Battery balancing methods: A comprehensive review. In Proceedings of the IEEE Vehicle Power and Propulsion Conference, Harbin, China, 3–5 September 2008; IEEE: Piscataway, NJ, USA, 2008; pp. 1–6. doi:10.1109/VPPC.2008.4677669.
403. Qi, J.; Dah-Chuan Lu, D. Review of battery cell balancing techniques. In Proceedings of the Australasian Universities Power Engineering Conference (AUPEC), Perth, WA, Australia, 28 September–1 October 2014; Abu-Siada, A., Ed.; IEEE: Piscataway, NJ, USA, 2014; pp. 1–6. doi:10.1109/AUPEC.2014.6966514.
404. Omariba, Z.B.; Zhang, L.; Sun, D. Review of Battery Cell Balancing Methodologies for Optimizing Battery Pack Performance in Electric Vehicles. *IEEE Access* **2019**, *7*, 129335–129352. doi:10.1109/ACCESS.2019.2940090.
405. Bouchhima, N.; Schnierle, M.; Schulte, S.; Birke, K.P. Active model-based balancing strategy for self-reconfigurable batteries. *J. Power Sources* **2016**, *322*, 129–137. doi:10.1016/j.jpowsour.2016.05.027.
406. Alaas, Z.; Wang, C.; Jiang, C.; Duan, C.; Chen, J. Improved cascaded multilevel battery inverters with phase-to-phase SOC balancing capability. In Proceedings of the 2017 IEEE Transportation and Electrification Conference and Expo (ITEC), Chicago, IL, USA, 22–24 June 2017; IEEE: Piscataway, NJ, USA, 2017; pp. 323–327. doi:10.1109/ITEC.2017.7993292.

407. Vasiladiotis, M.; Rufer, A. Balancing control actions for cascaded H-bridge converters with integrated battery energy storage. In Proceedings of the 2013 15th European Conference on Power Electronics and Applications (EPE), Lille, France, 2–6 September 2013; pp. 1–10. doi:10.1109/EPE.2013.6634337.
408. Yang, C.Y.; Chen, Y.M.; Juang, K.C. A sorting balance control for battery sources in a single phase multilevel inverter. In Proceedings of the IEEE Energy Conversion Congress and Exposition (ECCE), Cincinnati, OH, USA, 1–5 October 2017; pp. 2742–2747. doi:10.1109/ECCE.2017.8096513.
409. Kim, J.H.; Kang, M.S.; Oh, S.B.; Kim, E.H. New control scheme of lithium-polymer battery units using single phase multi-level converter. In Proceedings of the IEEE 8th International Conference on Power Electronics and ECCE Asia (ICPE & ECCE), Jeju, Korea, 30 May–3 June 2011; IEEE: Piscataway, NJ, USA, 2011; pp. 2997–3000. doi:10.1109/ICPE.2011.5944804.
410. Babaei, E.; Azimpour, Y.; Kangarlu, M.F. Charge balance control of a seven-level asymmetric cascade multilevel inverter. In Proceedings of the 3rd IEEE International Symposium on Power Electronics for Distributed Generation Systems (PEDG), Aalborg, Denmark, 25–28 June 2012; IEEE: Piscataway, NJ, USA, 2012; pp. 674–681. doi:10.1109/PEDG.2012.6254075.
411. Chang, F.; Zheng, Z.; Li, Y.; Peng, L. A two-level SOC balance strategy for a novel hybrid energy storage topology. In Proceedings of the 2015 17th European Conference on Power Electronics and Applications (EPE'15 ECCE-Europe), Geneva, Switzerland, 8–10 September 2015; pp. 1–10. doi:10.1109/EPE.2015.7309171.
412. Townsend, C.D.; Summers, T.J.; Betz, R.E. Phase-Shifted Carrier Modulation Techniques for Cascaded H-Bridge Multilevel Converters. *IEEE Trans. Ind. Electron.* **2015**, *62*, 6684–6696. doi:10.1109/TIE.2015.2442516.
413. D'Arco, S.; Piegari, L.; Tricoli, P. A modular converter with embedded battery cell balancing for electric vehicles. In Proceedings of the Electrical systems for aircraft, railway and ship propulsion (ESARS), Bologna, Italy, 16–18 October 2012; IEEE: Piscataway, NJ, USA, 2012; pp. 1–6. doi:10.1109/ESARS.2012.6387499.
414. Ilves, K.; Harnefors, L.; Norrga, S.; Nee, H.P. Predictive Sorting Algorithm for Modular Multilevel Converters Minimizing the Spread in the Submodule Capacitor Voltages. *IEEE Trans. Power Electron.* **2015**, *30*, 440–449. doi:10.1109/TPEL.2014.2308018.
415. Siemaszko, D. Fast Sorting Method for Balancing Capacitor Voltages in Modular Multilevel Converters. *IEEE Trans. Power Electron.* **2015**, *30*, 463–470. doi:10.1109/TPEL.2014.2312101.
416. Goetz, S.M.; Li, Z.; Liang, X.; Zhang, C.; Lukic, S.M.; Peterchev, A.V. Control of Modular Multilevel Converter With Parallel Connectivity—Application to Battery Systems. *IEEE Trans. Power Electron.* **2017**, *32*, 8381–8392. doi:10.1109/TPEL.2016.2645884.
417. Kandasamy, K.; Vilathgamuwa, M.; Tseng, K.J. Inter-module state-of-charge balancing and fault-tolerant operation of cascaded H-bridge converter using multi-dimensional modulation for electric vehicle application. *IET Power Electron.* **2015**, *8*, 1912–1919. doi:10.1049/iet-pel.2014.0943.
418. Maharjan, L.; Inoue, S.; Akagi, H.; Asakura, J. State-of-Charge (SOC)-Balancing Control of a Battery Energy Storage System Based on a Cascade PWM Converter. *IEEE Trans. Power Electron.* **2009**, *24*, 1628–1636. doi:10.1109/TPEL.2009.2014868.
419. T.J. Summers.; R.E. Betz.; G. Mirzaeva. Phase leg voltage balancing of a cascaded H-Bridge converter based STATCOM using zero sequence injection. In Proceedings of the 2009 13th European Conference on Power Electronics and Applications, Barcelona, Spain, 8–10 September 2009; pp. 1–10.
420. Li, N.; Gao, F.; Hao, T.; Ma, Z.; Zhang, C. SOH Balancing Control Method for the MMC Battery Energy Storage System. *IEEE Trans. Ind. Electron.* **2018**, *65*, 6581–6591. doi:10.1109/TIE.2017.2733462.
421. Altaf, F.; Johannesson, L.; Egardt, B. Simultaneous Thermal and State-of-Charge Balancing of Batteries: A Review. In Proceedings of the 2014 IEEE Vehicle Power and Propulsion Conference (VPPC), Coimbra, Portugal, 27–30 October 2014; IEEE: Piscataway, NJ, USA, 2014; pp. 1–7. doi:10.1109/VPPC.2014.7007132.
422. Docimo, D.J.; Fathy, H.K. Using a Linear Quadratic Regulator to Attenuate Cell-to-Cell Heterogeneity within a Lithium-Ion Battery Pack. In Proceedings of the 2018 IEEE Conference on Control Technology and Applications (CCTA), Copenhagen, Denmark, 21–24 August 2018; pp. 1395–1402. doi:10.1109/CCTA.2018.8511090.
423. Bouchhima, N.; Gossen, M.; Schulte, S.; Birke, K.P. Lifetime of self-reconfigurable batteries compared with conventional batteries. *J. Energy Storage* **2018**, *15*, 400–407. doi:10.1016/j.est.2017.11.014.
424. Kleiner, J.; Lechermann, L.; Komsijska, L.; Elger, G.; Endisch, C. Thermal Behavior of Intelligent Automotive Lithium-Ion Batteries: Operating Strategies for Adaptive Thermal Balancing by Reconfiguration. *J. Energy Storage* **2021**, *40*, 102686.
425. Altai, F.; Egardt, B.; Johannesson, L. Electro-thermal Control of Modular Battery using Model Predictive Control with Control Projections. *IFAC-PapersOnLine* **2015**, *48*, 368–375. doi:10.1016/j.ifacol.2015.10.053.
426. Hasan, N.S.; Rosmin, N.; Osman, D.A.A.; Hatib, A. Reviews on multilevel converter and modulation techniques. *Renew. Sustain. Energy Rev.* **2017**, *80*, 163–174. doi:10.1016/j.rser.2017.05.163.
427. Kamaldeep.; Kumar, J. Switch reduction and performance analysis using different modulation technique in multilevel inverter. In Proceedings of the First IEEE International Conference on Power Electronics, Intelligent Control and Energy Systems (IPEICES 2016), Delhi, India, 4–6 July 2016; pp. 1–4. doi:10.1109/ICPEICES.2016.7853068.
428. Hinago, Y.; Koizumi, H. A Switched-Capacitor Inverter Using Series/Parallel Conversion With Inductive Load. *IEEE Trans. Ind. Electron.* **2012**, *59*, 878–887. doi:10.1109/TIE.2011.2158768.
429. Nabae, A.; Takahashi, I.; Akagi, H. A New Neutral-Point-Clamped PWM Inverter. *IEEE Trans. Ind. Appl.* **1981**, *IA-17*, 518–523. doi:10.1109/TIA.1981.4503992.
430. Rodriguez, J.; Bernet, S.; Wu, B.; Pontt, J.O.; Kouro, S. Multilevel Voltage-Source-Converter Topologies for Industrial Medium-Voltage Drives. *IEEE Trans. Ind. Electron.* **2007**, *54*, 2930–2945. doi:10.1109/TIE.2007.907044.

431. Goetz, S.M.; Peterchev, A.V.; Weyh, T. Modular Multilevel Converter With Series and Parallel Module Connectivity: Topology and Control. *IEEE Trans. Power Electron.* **2015**, *30*, 203–215. doi:10.1109/TPEL.2014.2310225.
432. Hinago, Y.; Koizumi, H. A single phase multilevel inverter using switched series/parallel DC voltage sources. In Proceedings of the IEEE Energy Conversion Congress and Exposition, San Jose, CA, USA, 20–24 September 2009; IEEE: Piscataway, NJ, USA, 2009; pp. 1962–1967. doi:10.1109/ECCE.2009.5316515.
433. Vasiladiotis, M.; Rufer, A. Analysis and Control of Modular Multilevel Converters With Integrated Battery Energy Storage. *IEEE Trans. Power Electron.* **2015**, *30*, 163–175. doi:10.1109/TPEL.2014.2303297.
434. Quraan, M.; Tricoli, P.; D Arco, S.; Piegari, L. Efficiency Assessment of Modular Multilevel Converters for Battery Electric Vehicles. *IEEE Trans. Power Electron.* **2017**, *32*, 2041–2051. doi:10.1109/TPEL.2016.2557579.
435. Korte, C.; Specht, E.; Hiller, M.; Goetz, S. Efficiency evaluation of MMSPC/CHB topologies for automotive applications. In Proceedings of the 2017 IEEE 12th International Conference on Power Electronics and Drive Systems (PEDS), Honolulu, HI, USA, 12–15 December 2017; pp. 324–330. doi:10.1109/PEDS.2017.8289145.
436. Baronti, F.; Fantechi, G.; Roncella, R.; Saletti, R. Design of a module switch for battery pack reconfiguration in high-power applications. In Proceedings of the 2012 IEEE International Symposium on Industrial Electronics, Hangzhou, China, 28–31 May 2012; pp. 1330–1335. doi:10.1109/ISIE.2012.6237283.
437. Babaei, E.; Hosseini, S.H. New cascaded multilevel inverter topology with minimum number of switches. *Energy Convers. Manag.* **2009**, *50*, 2761–2767. doi:10.1016/j.enconman.2009.06.032.
438. Lesnicar, A.; Marquardt, R. An innovative modular multilevel converter topology suitable for a wide power range. In Proceedings of the 2003 IEEE Bologna PowerTech, Bologna, Italy, 23–26 June 2003; pp. 272–277. doi:10.1109/PTC.2003.1304403.
439. Allebrod, S.; Hamerski, R.; Marquardt, R. New transformerless, scalable Modular Multilevel Converters for HVDC-transmission. In Proceedings of the IEEE Power Electronics Specialists Conference, Rhodes, Greece, 15–19 June 2008; pp. 174–179. doi:10.1109/PESC.2008.4591920.
440. Alaas, Z.; Wang, C.; Jiang, C.; Duan, C.; Le Wang, Y. A Hierarchal Cascaded Multilevel Converter for uniform SOC battery management. In Proceedings of the 2016 IEEE Transportation Electrification Conference and Expo (ITEC), Dearborn, MI, USA, 27–29 June 2016; pp. 1–6. doi:10.1109/ITEC.2016.7520191.
441. Liu, L.; Gotting, G.; Xie, J. Torque Ripple Reduction Using Variable DC-link Voltage Technique for Permanent Magnet Synchronous Motor in Battery Electric Vehicle. In Proceedings of the 2020 IEEE 29th International Symposium on Industrial Electronics (ISIE), Delft, The Netherlands, 17–19 June 2020; pp. 374–379. doi:10.1109/ISIE45063.2020.9152412.
442. Horsche, M.; Sturm, M.; Jossen, A. Realising Serial Hybrid Energy Storage Systems (sHESS) by Implementing Switching Circuits on Battery Cell Level. *World Electr. Veh. J.* **2016**, *8*, 371–378. doi:10.3390/wevj8020371.
443. D’Arco, S.; Quraan, M.; Tricoli, P.; Piegari, L. Low frequency operation of Modular Multilevel Converters with embedded battery cells for traction drives. In Proceedings of the 2016 International Symposium on Power Electronics, Electrical Drives, Automation and Motion (SPEEDAM), Capri, Italy, 22–24 June 2016; pp. 1375–1382. doi:10.1109/SPEEDAM.2016.7525982.
444. Choi, W.K.; Kang, F.S. H-bridge based multilevel inverter using PWM switching function. In Proceedings of the 31st International Telecommunications Energy Conference, Incheon, Korea, 18–22 October 2009; IEEE: Piscataway, NJ, USA, 2009; pp. 1–5. doi:10.1109/INTLEC.2009.5351886.
445. Babaei, E.; Farhadi Kangarlu, M. Cross-switched multilevel inverter: an innovative topology. *IET Power Electron.* **2013**, *6*, 642–651. doi:10.1049/iet-pel.2012.0265.
446. Sabahi, M.; Babaei, E.; Farhadi Kangarlu, M. Cascaded cross-switched multilevel inverter in symmetric and asymmetric conditions. *IET Power Electron.* **2013**, *6*, 1041–1050. doi:10.1049/iet-pel.2012.0563.
447. Babaei, E.; Hosseini, S.H.; Gharehpetian, G.B.; Haque, M.T.; Sabahi, M. Reduction of dc voltage sources and switches in asymmetrical multilevel converters using a novel topology. *Electr. Power Syst. Res.* **2007**, *77*, 1073–1085. doi:10.1016/j.epsr.2006.09.012.
448. Hammond, P.W. A new approach to enhance power quality for medium voltage AC drives. *IEEE Trans. Ind. Appl.* **1997**, *33*, 202–208. doi:10.1109/28.567113.
449. Josefsson, O.; Thiringer, T.; Lundmark, S.; Zelaya, H. Evaluation and comparison of a two-level and a multilevel inverter for an EV using a modulized battery topology. In Proceedings of the IECON 2012, Montreal, QC, Canada, 25–28 October 2012; IEEE: Piscataway, NJ, USA, 2012; pp. 2949–2956. doi:10.1109/IECON.2012.6389427.
450. Diong, B.; Sepahvand, H.; Corzine, K.A. Harmonic Distortion Optimization of Cascaded H-Bridge Inverters Considering Device Voltage Drops and Noninteger DC Voltage Ratios. *IEEE Trans. Ind. Electron.* **2013**, *60*, 3106–3114. doi:10.1109/TIE.2012.2202351.
451. Routray, A.; Kumar Singh, R.; Mahanty, R. Harmonic Minimization in Three-Phase Hybrid Cascaded Multilevel Inverter Using Modified Particle Swarm Optimization. *IEEE Trans. Ind. Inform.* **2019**, *15*, 4407–4417. doi:10.1109/TII.2018.2883050.
452. Kuder, M.; Singer, A.; Weyh, T. Multi-Engine in Modular Multilevel Converter based Split Battery Systems for Electric Vehicles. *PCIM Europe 2019*; International Exhibition and Conference for Power Electronics, Intelligent Motion, Renewable Energy, and Energy Management, 2019; pp. 1–7. doi:10.13140/RG.2.2.35138.81601.
453. Theliander, O.; Kersten, A.; Kuder, M.; Han, W.; Arfa Grunditz, E.; Thiringer, T. Battery Modeling and Parameter Extraction for Drive Cycle Loss Evaluation of a Modular Battery System for Vehicles based on a Cascaded H-Bridge Multilevel Inverter. *IEEE Trans. Ind. Appl.* **2020**, *56*, 6968–6977. doi:10.1109/TIA.2020.3026662.

454. Terbrack, C.; Stottner, J.; Endisch, C. Operation of an Externally Excited Synchronous Machine with a Hybrid Multilevel Inverter. In Proceedings of the 2020 22nd European Conference on Power Electronics and Applications (EPE'20 ECCE Europe), Lyon, France, 7–11 September 2020; pp. 1–12. doi:10.23919/EPE20ECCEurope43536.2020.9215895.
455. Rodriguez, J.I.; Leeb, S.B. A Multilevel Inverter Topology for Inductively Coupled Power Transfer. *IEEE Trans. Power Electron.* **2006**, *21*, 1607–1617. doi:10.1109/TPEL.2006.882965.
456. Hinago, Y.; Koizumi, H. A Single-Phase Multilevel Inverter Using Switched Series/Parallel DC Voltage Sources. *IEEE Trans. Ind. Electron.* **2010**, *57*, 2643–2650. doi:10.1109/TIE.2009.2030204.
457. Helling, F.; Gotz, S.; Weyh, T. A battery modular multilevel management system (BM3) for electric vehicles and stationary energy storage systems. In Proceedings of the 2014 16th European Conference on Power Electronics and Applications, Lappeenranta, Finland, 26–28 August 2014; pp. 1–10. doi:10.1109/EPE.2014.6910821.
458. Kim, H.; Shin, K.G. DESA: Dependable, Efficient, Scalable Architecture for Management of Large-Scale Batteries. *IEEE Trans. Ind. Inform.* **2012**, *8*, 406–417. doi:10.1109/TII.2011.2166771.
459. F. Helling.; M. Kuder.; A. Singer.; S. Schmid.; T. Weyh. Low Voltage Power Supply in Modular Multilevel Converter based Split Battery Systems for Electrical Vehicles. In Proceedings of the 20th European Conference on Power Electronics and Applications, Riga, Latvia, 17–21 September 2018; pp. 1–10.
460. Helling, F.; Gluck, J.; Singer, A.; Weyh, T. Modular multilevel battery (M2B) for electric vehicles. In Proceedings of the 2016 18th European Conference on Power Electronics and Applications (EPE'16 ECCE Europe), Karlsruhe, Germany, 5–9 September 2016; pp. 1–9. doi:10.1109/EPE.2016.7695480.
461. Terbrack, C.; Stöttner, J.; Endisch, C. Design and Validation of the Parallel Enhanced Commutation Integrated Nested Multilevel Inverter Topology. *IEEE Trans. Ind. Electron.* **2021**, under review.
462. Franquelo, L.; Rodriguez, J.; Leon, J.; Kouro, S.; Portillo, R.; Prats, M. The age of multilevel converters arrives. *IEEE Ind. Electron. Mag.* **2008**, *2*, 28–39. doi:10.1109/MIE.2008.923519.
463. McGrath, B.P.; Teixeira, C.A.; Holmes, D.G. Optimized Phase Disposition (PD) Modulation of a Modular Multilevel Converter. *IEEE Trans. Ind. Appl.* **2017**, *53*, 4624–4633. doi:10.1109/TIA.2017.2697953.
464. McGrath, B.P.; Holmes, D.G. Multicarrier PWM strategies for multilevel inverters. *IEEE Trans. Ind. Electron.* **2002**, *49*, 858–867. doi:10.1109/TIE.2002.801073.
465. Su, G.J. Multilevel DC link inverter. In Proceedings of the Conference record of the 2004 IEEE Industry Applications Conference, Seattle, WA, USA, 3–7 October 2004 ; Institute of Electrical and Electronics Engineers: Piscataway, NJ, USA, 2004; pp. 806–812. doi:10.1109/IAS.2004.1348506.
466. Gupta, K.K.; Jain, S. Comprehensive review of a recently proposed multilevel inverter. *IET Power Electron.* **2014**, *7*, 467–479. doi:10.1049/iet-pel.2012.0438.
467. Debnath, S.; Qin, J.; Bahrani, B.; Saeedifard, M.; Barbosa, P. Operation, Control, and Applications of the Modular Multilevel Converter: A Review. *IEEE Trans. Power Electron.* **2015**, *30*, 37–53. doi:10.1109/TPEL.2014.2309937.
468. Babaei, E. A Cascade Multilevel Converter Topology With Reduced Number of Switches. *IEEE Trans. Power Electron.* **2008**, *23*, 2657–2664. doi:10.1109/TPEL.2008.2005192.
469. Ebrahimi, J.; Babaei, E.; Gharehpetian, G.B. A New Multilevel Converter Topology With Reduced Number of Power Electronic Components. *IEEE Trans. Ind. Electron.* **2012**, *59*, 655–667. doi:10.1109/TIE.2011.2151813.
470. Buccella, C.; de Santis, C.C.E.; Khalid, H.A. Impact of the Number of Angles and Levels on Harmonic Mitigation in Multilevel Converters. In Proceedings of the IECON 2015, Yokohama, Japan, 9–12 November 2015; Ohishi, K., Hashimoto, H., Eds.; IEEE: Piscataway, NJ, USA, 2015; pp. 002834–002839. doi:10.1109/IECON.2015.7392532.
471. Gupta, K.K.; Jain, S. Topology for multilevel inverters to attain maximum number of levels from given DC sources. *IET Power Electron.* **2012**, *5*, 435. doi:10.1049/iet-pel.2011.0178.
472. Singer, A.; Helling, F.; Weyh, T.; Jungbauer, J.; Pfisterer, H.J. Modular multilevel parallel converter based split battery system (M2B) for stationary storage applications. In Proceedings of the 2017 19th European Conference on Power Electronics and Applications (EPE'17 ECCE Europe), Warsaw, Poland, 11–14 September 2017; pp. P.1–P.10. doi:10.23919/EPE17ECCEEurope.2017.8099064.
473. Rech, C.; Pinheiro, J.R. Hybrid Multilevel Converters: Unified Analysis and Design Considerations. *IEEE Trans. Ind. Electron.* **2007**, *54*, 1092–1104. doi:10.1109/TIE.2007.892255.
474. Helling, F.; Gotz, S.; Singer, A.; Weyh, T. Fast Modular Multilevel series/Parallel Converter for direct-drive gas turbines. In Proceedings of the 2015 IEEE North West Russia Section Young Researchers in Electrical and Electronic Engineering Conference (2015 ElConRusNW), St. Petersburg, Russia, 2–4 February 2015; Shaposhnikov, S.O., Ed.; IEEE: Piscataway, NJ, USA, 2015; pp. 198–202. doi:10.1109/ElConRusNW.2015.7102262.
475. Liang, H.; Guo, L.; Song, J.; Yang, Y.; Zhang, W.; Qi, H. State-of-Charge Balancing Control of a Modular Multilevel Converter with an Integrated Battery Energy Storage. *Energies* **2018**, *11*, 873. doi:10.3390/en11040873.
476. Marquardt, R. Modular Multilevel Converter: An universal concept for HVDC-Networks and extended DC-Bus-applications. In Proceedings of the International Power Electronics Conference (IPEC), Sapporo, Japan, 21–24 June 2010; IEEE: Piscataway, NJ, USA, 2010; pp. 502–507. doi:10.1109/IPEC.2010.5544594.
477. Chang, F.; Ilina, O.; Lienkamp, M.; Voss, L. Improving the Overall Efficiency of Automotive Inverters Using a Multilevel Converter Composed of Low Voltage Si mosfets. *IEEE Trans. Power Electron.* **2019**, *34*, 3586–3602. doi:10.1109/TPEL.2018.2854756.



478. Rodriguez, J.; Lai, J.S.; Peng, F.Z. Multilevel inverters: A survey of topologies, controls, and applications. *IEEE Trans. Ind. Electron.* **2002**, *49*, 724–738. doi:10.1109/TIE.2002.801052.
479. Lai, J.S.; Peng, F.Z. Multilevel converters—a new breed of power converters. *Electron. Lett.* **1996**, *32*, 509–517. doi:10.1109/28.502161.
480. El-Hosainy, A.; Hamed, H.A.; Azazi, H.Z.; El-Kholy, E.E. A review of multilevel inverter topologies, control techniques, and applications. In Proceedings of the 2017 Nineteenth International Middle East Power Systems Conference (MEPCON), Cairo, Egypt, 19–21 December 2017; pp. 1265–1275. doi:10.1109/MEPCON.2017.8301344.
481. Rodriguez, J.; Franquelo, L.G.; Kouro, S.; Leon, J.I.; Portillo, R.C.; Prats, M.; Perez, M.A. Multilevel Converters: An Enabling Technology for High-Power Applications. *Proc. IEEE* **2009**, *97*, 1786–1817. doi:10.1109/JPROC.2009.2030235.
482. Deng, Y.; Harley, R.G. Space-Vector Versus Nearest-Level Pulse Width Modulation for Multilevel Converters. *IEEE Trans. Power Electron.* **2015**, *30*, 2962–2974. doi:10.1109/TPEL.2014.2331687.
483. Swamy, D.M.; Venkatesan, M. Three Phase Multi-Level Inverter Topologies and Modulation Techniques: A Short review. In Proceedings of the 2019 2nd International Conference on Intelligent Computing, Instrumentation and Control Technologies (ICICICT), Kannur, India, 5–6 July 2019; pp. 305–311. doi:10.1109/ICICICT46008.2019.8993140.
484. Dupont, F.H.; Pinheiro, J.R.; Montagner, V.F.; Pinheiro, H. GA optimization to mitigate voltage harmonics of cascade multilevel converters. In Proceedings of the IEEE Chilecon2015, Santiago, Chile, 28–30 October 2015; Fernández-Fernández, M., Ed.; IEEE: Piscataway, NJ, USA, 2015; pp. 461–466. doi:10.1109/Chilecon.2015.7400418.
485. Li, L.; Czarkowski, D.; Liu, Y.; Pillay, P. Multilevel selective harmonic elimination PWM technique in series-connected voltage inverters. *IEEE Trans. Appl.* **2000**, *36*, 160–170. doi:10.1109/28.821811.
486. Rodriguez, J.; Moran, L.; Correa, P.; Silva, C. A vector control technique for medium-voltage multilevel inverters. *IEEE Trans. Ind. Electron.* **2002**, *49*, 882–888. doi:10.1109/TIE.2002.801235.
487. Attique, Q.M. A Survey on Space-Vector Pulse Width Modulation for Multilevel Inverters. *CPSS Trans. Power Electron. Appl.* **2017**, *2*, 226–236. doi:10.24295/CPSSTPEA.2017.00021.
488. Prasad, K.N.V.; ParimitaPradhan, P.; Misra, B.; Surekha, J. A modified space vector algorithm for 5-level cascaded multilevel inverter. In Proceedings of the 2017 Innovations in Power and Advanced Computing Technologies (i-PACT), Vellore, India, 21–22 April 2017; pp. 1–6. doi:10.1109/IPACT.2017.8245107.
489. L.G. Franquelo, J.I. León, M.M. Prats, and R. Portillo. Space Vector Modulation techniques for multilevel converters—A survey. *Prz. Elektrotech.* **2006**, *82*, 56–61.
490. Mostafa, M.; Abdou, A.F.; El-Gawad, A.F.A.; El-Kholy, E.E. Comparison of multi-carrier and SHE-PWM for a nine levels cascaded H-bridge inverter. In Proceedings of the 2017 Nineteenth International Middle East Power Systems Conference (MEPCON), Cairo, Egypt, 19–21 December 2017; pp. 1483–1491. doi:10.1109/MEPCON.2017.8301379.
491. Becker, J.; Nemeth, T.; Wegmann, R.; Sauer, D. Dimensioning and Optimization of Hybrid Li-Ion Battery Systems for EVs. *World Electr. Veh. J.* **2018**, *9*, 19. doi:10.3390/wevj9020019.
492. Tu, C.H.; Emadi, A. A novel series-parallel reconfigurable hybrid energy storage system for electrified vehicles. In Proceedings of the 2012 IEEE Transportation Electrification Conference and Expo (ITEC), Dearborn, MI, USA, 18–20 June 2012; pp. 1–4. doi:10.1109/ITEC.2012.6243502.
493. Ciccarelli, F.; Clemente, G.; Iannuzzi, D. Energy storage management control based on supercapacitors using a modular multilevel inverter topology for electrical vehicles. In Proceedings of the 2013 International Conference on Clean Electrical Power (ICCEP), Alghero, Italy, 11–13 June 2013; pp. 170–176. doi:10.1109/ICCEP.2013.6586985.
494. Guo, F.; Sharma, R. A modular multilevel converter with half-bridge submodules for hybrid energy storage systems integrating battery and UltraCapacitor. In Proceedings of the 2015 IEEE Applied Power Electronics Conference and Exposition (APEC), Charlotte, NC, USA, 15–19 March 2015; pp. 3025–3030. doi:10.1109/APEC.2015.7104783.
495. Bharadwaj, C.A.; Maiti, S. Modular multilevel converter based hybrid energy storage system. In Proceedings of the IEEE PES Asia-Pacific Power and Energy Engineering Conference 2017, Bangalore, India, 8–10 November 2017; pp. 1–6. doi:10.1109/APPEEC.2017.8308983.
496. George, S.S.; Badawy, M.O. A Modular Multi-Level Converter for Energy Management of Hybrid Storage System in Electric Vehicles. In Proceedings of the 2018 IEEE Transportation Electrification Conference and Expo (ITEC), Long Beach, CA, USA, 13–15 June 2018; pp. 336–341. doi:10.1109/ITEC.2018.8450237.
497. Zimmermann, T.; Mora, M.; Steinhorst, S.; Mueller-Gritschneider, D.; Jossen, A. Analysis of Dissipative Losses in Modular Reconfigurable Energy Storage Systems Using SystemC TLM and SystemC-AMS. *ACM Trans. Des. Autom. Electron. Syst.* **2019**, *24*, 1–33. doi:10.1145/3321387.
498. Zimmermann, T.; Keil, P.; Hofmann, M.; Horsche, M.F.; Pichlmaier, S.; Jossen, A. Review of system topologies for hybrid electrical energy storage systems. *J. Energy Storage* **2016**, *8*, 78–90. doi:10.1016/j.est.2016.09.006.
499. Krishna P.S., P.; N.S., J.; Kedlaya, A. Energy Management Strategies for Hybrid Energy Storage System in Electric Vehicles: A Review. In Proceedings of the 2020 IEEE International Conference on Electronics, Computing and Communication Technologies (CONECCT), Bangalore, India, 2–4 July 2020; pp. 1–7. doi:10.1109/CONECCT50063.2020.9198655.
500. Jiang, Z.; Gao, L.; Dougal, R.A. Adaptive Control Strategy for Active Power Sharing in Hybrid Fuel Cell/Battery Power Sources. *IEEE Trans. Energy Convers.* **2007**, *22*, 507–515. doi:10.1109/TEC.2005.853747.
501. Song, Z.; Hofmann, H.; Li, J.; Hou, J.; Han, X.; Ouyang, M. Energy management strategies comparison for electric vehicles with hybrid energy storage system. *Appl. Energy* **2014**, *134*, 321–331. doi:10.1016/j.apenergy.2014.08.035.

502. Santucci, A.; Sornioti, A.; Lekakou, C. Power split strategies for hybrid energy storage systems for vehicular applications. *J. Power Sources* **2014**, *258*, 395–407. doi:10.1016/j.jpowsour.2014.01.118.
503. Zhou, W.; Li, M.; Yin, H.; Ma, C. An adaptive fuzzy logic based energy management strategy for electric vehicles. In Proceedings of the 2014 IEEE 23rd International Symposium on Industrial Electronics (ISIE), Istanbul, Turkey, 1–4 June 2014; pp. 1778–1783. doi:10.1109/ISIE.2014.6864884.
504. Zhang, Q.; Deng, W. An Adaptive Energy Management System for Electric Vehicles Based on Driving Cycle Identification and Wavelet Transform. *Energies* **2016**, *9*, 341. doi:10.3390/en9050341.
505. Hu, J.; Jiang, X.; Jia, M.; Zheng, Y. Energy Management Strategy for the Hybrid Energy Storage System of Pure Electric Vehicle Considering Traffic Information. *Appl. Sci.* **2018**, *8*, 1266. doi:10.3390/app8081266.
506. Shen, J.; Khaligh, A. A Supervisory Energy Management Control Strategy in a Battery/Ultracapacitor Hybrid Energy Storage System. *IEEE Trans. Transp. Electr.* **2015**, *1*, 223–231. doi:10.1109/TTE.2015.2464690.
507. Chenghui, Z.; Qingsheng, S.; Naxin, C.; Wuhua, L. Particle Swarm Optimization for energy management fuzzy controller design in dual-source electric vehicle. In Proceedings of the IEEE Power Electronics Specialists Conference 2007, Orlando, FL, USA, 17–21 June 2007; pp. 1405–1410. doi:10.1109/PESC.2007.4342200.
508. Mesbahi, T.; Rizoug, N.; bartholomeus, P.; Sadoun, R.; Khenfri, F.; Lemoigne, p. Optimal Energy Management For a Li-Ion Battery/Supercapacitor Hybrid Energy Storage System Based on Particle Swarm Optimization Incorporating Nelder-Mead Simplex Approach. *IEEE Trans. Intell. Veh.* **2017**, *2*, 99–110. doi:10.1109/TIV.2017.2720464.
509. Awerbuch, J.J.; Sullivan, C.R. Filter-based power splitting in ultracapacitor-battery hybrids for vehicular applications. In Proceedings of the 2010 IEEE 12th Workshop on Control and Modeling for Power Electronics (COMPEL), Boulder, CO, USA, 28–30 June 2010; pp. 1–8. doi:10.1109/COMPEL.2010.5562429.
510. Wang, B.; Wang, C.; Ma, G.; Le Zhang. Power-split strategy based on average power method for semi-active hybrid energy storage system in small electric vehicles. *Energy Procedia* **2019**, *158*, 2994–2999. doi:10.1016/j.egypro.2019.01.970.
511. Xie, Q.; Lin, X.; Wang, Y.; Pedram, M.; Shin, D.; Chang, N. State of health aware charge management in hybrid electrical energy storage systems. In Proceedings of the 2012 Design, Automation & Test in Europe Conference & Exhibition (DATE), Dresden, Germany, 12–16 March 2012; pp. 1060–1065. doi:10.1109/DATE.2012.6176652.
512. Zhang, X.; Mi, C.C.; Masrur, A.; Daniszewski, D. Wavelet-transform-based power management of hybrid vehicles with multiple on-board energy sources including fuel cell, battery and ultracapacitor. *J. Power Sources* **2008**, *185*, 1533–1543. doi:10.1016/j.jpowsour.2008.08.046.
513. Hu, J.; Di Liu.; Du, C.; Yan, F.; Lv, C. Intelligent energy management strategy of hybrid energy storage system for electric vehicle based on driving pattern recognition. *Energy* **2020**, *198*, 117298. doi:10.1016/j.energy.2020.117298.
514. Romaus, C.; Gathmann, K.; Bocker, J. Optimal energy management for a hybrid energy storage system for electric vehicles based on Stochastic Dynamic Programming. In Proceedings of the 2010 IEEE Vehicle Power and Propulsion Conference, Lille, France, 1–3 September 2010; pp. 1–6. doi:10.1109/VPPC.2010.5728979.
515. Wegmann, R.; Döge, V.; Becker, J.; Sauer, D.U. Optimized operation of hybrid battery systems for electric vehicles using deterministic and stochastic dynamic programming. *J. Energy Storage* **2017**, *14*, 22–38. doi:10.1016/j.est.2017.09.008.
516. Fang Zhou.; Feng Xiao.; Cheng Chang.; Yulong Shao.; Chuanxue Song. Adaptive Model Predictive Control-Based Energy Management for Semi-Active Hybrid Energy Storage Systems on Electric Vehicles. *Energies* **2017**, *10*, 1063. doi:10.3390/en10071063.
517. Trovão, J.P.; Pereirinha, P.G.; Jorge, H.M.; Antunes, C.H. A multi-level energy management system for multi-source electric vehicles—An integrated rule-based meta-heuristic approach. *Appl. Energy* **2013**, *105*, 304–318. doi:10.1016/j.apenergy.2012.12.081.
518. Trovao, J.P.F.; Santos, V.D.N.; Antunes, C.H.; Pereirinha, P.G.; Jorge, H.M. A Real-Time Energy Management Architecture for Multisource Electric Vehicles. *IEEE Trans. Ind. Electron.* **2015**, *62*, 3223–3233. doi:10.1109/TIE.2014.2376883.
519. Choi, M.E.; Lee, J.S.; Seo, S.W. Real-Time Optimization for Power Management Systems of a Battery/Supercapacitor Hybrid Energy Storage System in Electric Vehicles. *IEEE Trans. Veh. Technol.* **2014**, *63*, 3600–3611. doi:10.1109/TVT.2014.2305593.
520. Yue, S.; Wang, Y.; Xie, Q.; Zhu, D.; Pedram, M.; Chang, N. Model-free learning-based online management of hybrid electrical energy storage systems in electric vehicles. In Proceedings of the IECON 2014—40th Annual Conference of the IEEE Industrial Electronics Society, Dallas, TX, USA, 29 October–1 November 2014; pp. 3142–3148. doi:10.1109/IECON.2014.7048959.
521. Jiayi Cao.; Rui Xiong. Reinforcement Learning-based Real-time Energy Management for Plug-in Hybrid Electric Vehicle with Hybrid Energy Storage System. *Energy Procedia* **2017**, *2017*, 1896–1901. doi:10.1016/j.egypro.2017.12.386.
522. Zhang, S.; Xiong, R.; Cao, J. Battery durability and longevity based power management for plug-in hybrid electric vehicle with hybrid energy storage system. *Appl. Energy* **2016**, *179*, 316–328. doi:10.1016/j.apenergy.2016.06.153.
523. Li, W.; Cui, H.; Nemeth, T.; Jansen, J.; Ünübayir, C.; Wei, Z.; Zhang, L.; Wang, Z.; Ruan, J.; Dai, H.; Wei, X.; Sauer, D.U. Deep reinforcement learning-based energy management of hybrid battery systems in electric vehicles. *J. Energy Storage* **2021**, *36*, 102355. doi:10.1016/j.est.2021.102355.
524. Yu, H.; Cao, D. Multi-objective Optimal Sizing and Real-time Control of Hybrid Energy Storage Systems for Electric Vehicles. In Proceedings of the IEEE Intelligent Vehicles Symposium 2018, Changshu, China, 26–30 June 2018; pp. 191–196. doi:10.1109/IVS.2018.8500629.
525. Yu, H.; Castelli-Dezza, F.; Cheli, F.; Tang, X.; Hu, X.; Lin, X. Dimensioning and Power Management of Hybrid Energy Storage Systems for Electric Vehicles With Multiple Optimization Criteria. *IEEE Trans. Power Electron.* **2021**, *36*, 5545–5556. doi:10.1109/TPEL.2020.3030822.

526. Hung, Y.H.; Wu, C.H. An integrated optimization approach for a hybrid energy system in electric vehicles. *Appl. Energy* **2012**, *98*, 479–490. doi:10.1016/j.apenergy.2012.04.012.
527. Baronti, F.; Fantechi, G.; Roncella, R.; Saletti, R. Intelligent Cell Gauge for a Hierarchical Battery Management System. In Proceedings of the IEEE Transactions on Transportation Electrification, Dearborn, MI, USA, 18–20 June 2012. doi:10.1109/ITEC.2012.6243471.
528. Rößler, W. When Do We Get the Electronic Battery Switch? In *Advanced Microsystems for Automotive Applications 2014*; Fischer-Wolfarth, J., Meyer, G., Eds.; Lecture Notes in Mobility; Springer International Publishing: Cham, Switzerland, 2014; pp. 165–177. doi:10.1007/978-3-319-08087-1.
529. Kim, T.; Qiao, W.; Qu, L. Series-connected self-reconfigurable multicell battery. In Proceedings of the 2011 Twenty-Sixth Annual IEEE Applied Power Electronics Conference and Exposition (APEC), Fort Worth, TX, USA, 6–11 March 2011; pp. 1382–1387. doi:10.1109/APEC.2011.5744772.
530. Steinhörst, S.; Shao, Z.; Chakraborty, S.; Kauer, M.; Li, S.; Lukasiewicz, M.; Narayanaswamy, S.; Rafique, M.U.; Wang, Q. Distributed reconfigurable Battery System Management Architectures. In Proceedings of the 2016 21st Asia and South Pacific Design Automation Conference (ASP-DAC), Macao, China, 25–28 January 2016; pp. 429–434. doi:10.1109/ASPDAC.2016.7428049.
531. Hanzl, C.; Hartmann, C.; Hölzle, M.; Liebhart, B.; Schmid, M.; Endisch, C. Current Commutation in a Switched Lithium-Ion Cell used in Cascaded Half-Bridge Multilevel Inverters. *IET Power Electron.* **2021**, *14*, 1073–1088. doi:10.1049/pel2.12088.
532. Shalchi Alishah, R.; Nazarpour, D.; Hosseini, S.H.; Sabahi, M. Novel multilevel inverter topologies for medium and high-voltage applications with lower values of blocked voltage by switches. *IET Power Electron.* **2014**, *7*, 3062–3071. doi:10.1049/iet-pel.2013.0670.
533. Ng, K.K. *Complete Guide to Semiconductor Devices*; John Wiley & Sons, Inc.: Hoboken, NJ, USA, 2009. doi:10.1002/9781118014769.
534. Ci, S.; Zhang, J.; Sharif, H.; Alahmad, M. (Eds.) *Dynamic Reconfigurable Multi-Cell Battery: A Novel Approach to Improve Battery Performance. Twenty-Seventh Annual IEEE Applied Power Electronics Conference and Exposition (APEC)*, **2012**; IEEE: Piscataway, NJ, USA, 2021; pp. 439–442. doi:10.1109/APEC.2012.6165857.
535. Ji, F.; Liao, L.; Wu, T.; Chang, C.; Wang, M. Self-reconfiguration batteries with stable voltage during the full cycle without the DC-DC converter. *J. Energy Storage* **2020**, *28*, 101213. doi:10.1016/j.est.2020.101213.
536. Lutz, J.; Schlangenotto, H.; Scheuermann, U.; de Doncker, R. *Semiconductor Power Devices*; Springer International Publishing: Cham, Switzerland, 2018. doi:10.1007/978-3-319-70917-8.
537. Haghdar, K. Optimal DC Source Influence on Selective Harmonic Elimination in Multilevel Inverters Using Teaching–Learning-Based Optimization. *IEEE Trans. Ind. Electron.* **2020**, *67*, 942–949. doi:10.1109/TIE.2019.2901657.
538. Haritha, M.; Sujith, S. DC link voltage balancing of three phase neutral point clamped multilevel inverter by redundant vector identification. In Proceedings of the IEEE International Conference on Power, Control, Signals and Instrumentation Engineering 2017, Chennai, India, 21–22 September 2017; pp. 1952–1958. doi:10.1109/ICPSI.2017.8392055.
539. Ma, Y.; Lin, H.; Wang, Z.; Ze, Z. Modified State-of-Charge Balancing Control of Modular Multilevel Converter with Integrated Battery Energy Storage System. *Energies* **2019**, *12*, 96. doi:10.3390/en12010096.
540. Memon, M.A.; Mekhilef, S.; Mubin, M. Selective harmonic elimination in multilevel inverter using hybrid APSO algorithm. *IET Power Electron.* **2018**, *11*, 1673–1680. doi:10.1049/iet-pel.2017.0486.
541. Tolbert, L.M.; Peng, F.Z.; Habetler, T.G. Multilevel inverters for electric vehicle applications. In Proceedings of the Power Electronics in Transportation (Cat. No.98TH8349), Dearborn, MI, USA, 22–23 October 1998; pp. 79–84. doi:10.1109/PET.1998.731062.
542. Baliga, B.J. *Fundamentals of Power Semiconductor Devices*; Springer International Publishing: Cham, Switzerland, 2019. doi:10.1007/978-3-319-93988-9.
543. Engelhardt, J.; Gabderakhmanova, T.; Rohde, G.; Marinelli, M. Reconfigurable Stationary Battery with Adaptive Cell Switching for Electric Vehicle Fast-Charging. In Proceedings of the 2020 55th International Universities Power Engineering Conference (UPEC), Turin, Italy, 1–4 September 2020; pp. 1–6. doi:10.1109/UPEC49904.2020.9209774.
544. Gao, Z.; Lu, Q. A Hybrid Cascaded Multilevel Converter Based on Three-Level Cells for Battery Energy Management Applied in Electric Vehicles. *IEEE Trans. Power Electron.* **2019**, *34*, 7326–7349. doi:10.1109/TPEL.2018.2882851.
545. Lee, K.M.; Kim, D.H.; Shin, J.H.; Goh, T.D.; Park, J.H.; Ryu, Y.H. Reconfigurable battery system with active balancing circuit. In Proceedings of the IECON 2019—45th Annual Conference of the IEEE Industrial Electronics Society, Lisbon, Portugal, 14–17 October 2019; pp. 4583–4586. doi:10.1109/IECON.2019.8927747.
546. Patel, V.; Tinari, M.; Buccella, C.; Cecati, C. Analysis on Multilevel Inverter Powertrains for E-transportation. In Proceedings of the 2019 IEEE 13th International Conference on Compatibility, Power Electronics and Power Engineering (CPE-POWERENG), Sonderborg, Denmark, 23–25 April 2019; pp. 1–6. doi:10.1109/CPE.2019.8862373.
547. Sathik, M.J.; Bhatnagar, K.; Siwakoti, Y.P.; Bassi, H.M.; Rawa, M.; Sandeep, N.; Yang, Y.; Blaabjerg, F. Switched-capacitor multilevel inverter with self-voltage-balancing for high-frequency power distribution system. *IET Power Electron.* **2020**, *13*, 1807–1818. doi:10.1049/iet-pel.2019.1249.
548. Schettino, G.; Viola, F.; Di Tommaso, A.O.; Livreri, P.; Miceli, R. Experimental Validation of a Novel Method for Harmonic Mitigation for a Three-Phase Five-Level Cascaded H-Bridges Inverter. *IEEE Trans. Ind. Appl.* **2019**, *55*, 6089–6101. doi:10.1109/TIA.2019.2933522.

549. Sheir, A.; Youssef, M.Z. A Novel Power Balancing Technique in Neutral Point Clamping Multilevel Inverters for the Electric Vehicle Industry under Distributed Unbalance Battery Powering Scheme. In Proceedings of the 2019 IEEE Applied Power Electronics Conference and Exposition (APEC), Anaheim, CA, USA, 17–21 March 2019; pp. 3304–3308. doi:10.1109/APEC.2019.8722183.
550. Sheir, A.; Youssef, M.Z.; Orabi, M. A Novel Bidirectional T-Type Multilevel Inverter for Electric Vehicle Applications. *IEEE Trans. Power Electron.* **2019**, *34*, 6648–6658. doi:10.1109/TPEL.2018.2871624.
551. Sheir, A.; Youssef, M.Z.; Orabi, M. A Novel Auxiliary Modular Inverter with Battery Integration for Electric Vehicle Applications. In Proceedings of the 2019 IEEE Applied Power Electronics Conference and Exposition (APEC), Anaheim, CA, USA, 17–21 March 2019; pp. 1730–1737. doi:10.1109/APEC.2019.8721803.
552. Drivetek AG. Available Online: [drivetek.ch](http://drivetek.ch) (accessed on 13 September 2021) Electric, Drive, Technology, Products, Multilevel, Highspeed, Inverter, 2019.
553. Reindl, A.; Meier, H.; Niemetz, M. Scalable, Decentralized Battery Management System Based on Self-organizing Nodes. In *Architecture of Computing Systems—ARCS 2020*; 2020; pp. 171–184. doi:10.1007/978-3-030-52794-5\textunderscore }13.
554. Brandl, M.; Gall, H.; Wenger, M.; Lorentz, V.; Giegerich, M.; Baronti, F.; Fantechi, G.; Fanucci, L.; Roncella, R.; Saletti, R.; et al. Batteries and battery management systems for electric vehicles. In Proceedings of the 2012 Design, Automation & Test in Europe Conference & Exhibition (DATE), Dresden, Germany, 12–16 March 2012; pp. 971–976. doi:10.1109/DATE.2012.6176637.
555. Otto, A.; Rzepka, S.; Mager, T.; Michel, B.; Lanciotti, C.; Günther, T.; Kanoun, O. Battery Management Network for Fully Electrical Vehicles Featuring Smart Systems at Cell and Pack Level. In *Advanced Microsystems for Automotive Applications 2012*; Meyer, G., Ed.; Springer: Berlin/Heidelberg, Germany, 2012. doi:10.1007/978-3-642-29673-4.
556. Baronti, F.; Fantechi, G.; Leonardi, E.; Roncella, R.; Saletti, R. Hierarchical platform for monitoring, managing and charge balancing of LiPo batteries. In Proceedings of the 2011 IEEE Vehicle Power and Propulsion Conference, Chicago, IL, USA, 6–9 September 2011; pp. 1–6. doi:10.1109/VPPC.2011.6043074.
557. Linlin, L.; Xu, Z.; Zhujinsheng.; Jing, X.; Shuntao, X. Research on dynamic equalization for lithium battery management system. In Proceedings of the 2017 29th Chinese Control In addition, Decision Conference (CCDC), Chongqing, China, 28–30 May 2017; pp. 6884–6888. doi:10.1109/CCDC.2017.7978421.
558. Narayanaswamy, S.; Park, S.; Steinhurst, S.; Chakraborty, S. Design automation for battery systems. In Proceedings of the International Conference on Computer-Aided Design—ICCAD '18, San Diego, CA, USA, 5–8 November 2018; Bahar, I., Ed.; ACM Press: New York, NY, USA, 2018; pp. 1–7. doi:10.1145/3240765.3243469.
559. Rahimi-Eichi, H.; Ojha, U.; Baronti, F.; Chow, M.Y. Battery Management System: An Overview of Its Application in the Smart Grid and Electric Vehicles. *IEEE Ind. Electron. Mag.* **2013**, *7*, 4–16. doi:10.1109/MIE.2013.2250351.
560. Li, Y.; Han, Y. A Module-Integrated Distributed Battery Energy Storage and Management System. *IEEE Trans. Power Electron.* **2016**, *31*, 8260–8270. doi:10.1109/TPEL.2016.2517150.
561. Kim, C.H.; Kim, M.Y.; Moon, G.W. A Modularized Charge Equalizer Using a Battery Monitoring IC for Series-Connected Li-Ion Battery Strings in Electric Vehicles. *IEEE Trans. Power Electron.* **2013**, *28*, 3779–3787. doi:10.1109/TPEL.2012.2227810.
562. Wenger, M.M.; Filimon, R.; Lorentz, V.; Marz, M. A robust contactless capacitive communication link for high power battery systems. In Proceedings of the 2014 IEEE 23rd International Symposium on Industrial Electronics (ISIE), Istanbul, Turkey, 1–4 June 2014; pp. 1766–1772. doi:10.1109/ISIE.2014.6864882.
563. Lorentz, V.; Wenger, M.M.; Grosch, J.L.; Giegerich, M.; Jank, M.; Marz, M.; Frey, L. Novel cost-efficient contactless distributed monitoring concept for smart battery cells. In Proceedings of the 2012 IEEE International Symposium on Industrial Electronics, Hangzhou, China, 28–31 May 2012; pp. 1342–1347. doi:10.1109/ISIE.2012.6237285.
564. Zhang, R.; Wu, J.; Wang, R.; Yan, R.; Zhu, Y.; He, X. A Novel Battery Management System Architecture Based on an Isolated Power/Data Multiplexing Transmission Bus. *IEEE Trans. Ind. Electron.* **2019**, *66*, 5979–5991. doi:10.1109/TIE.2018.2873143.
565. Schneider, M.; Ilgin, S.; Jegenhorst, N.; Kube, R.; Puttjer, S.; Riemschneider, K.R.; Vollmer, J. Automotive battery monitoring by wireless cell sensors. In Proceedings of the 2012 IEEE International Instrumentation and Measurement Technology Conference Proceedings, Graz, Austria, 13–16 May 2012; pp. 816–820. doi:10.1109/I2MTC.2012.6229439.
566. Li, Y.; Han, Y. Power electronics integration on battery cells. In Proceedings of the 2014 IEEE Applied Power Electronics Conference and Exposition—APEC 2014, Fort Worth, TX, USA, 16–20 March 2014; pp. 3318–3322. doi:10.1109/APEC.2014.6803782.
567. Steinhurst, S. Design and verification methodologies for Smart Battery Cells. In Proceedings of the 2016 International Symposium on Integrated Circuits (ISIC), Singapore, 12–14 December 2016; pp. 1–4. doi:10.1109/ISICIR.2016.7829706.
568. Steinhurst, S.; Lukasiewicz, M.; Narayanaswamy, S.; Kauer, M.; Chakraborty, S. Smart Cells for Embedded Battery Management. In Proceedings of the 2014 IEEE International Conference on Cyber-Physical Systems, Networks, and Applications, Hong Kong, China, 25–26 August 2014; pp. 59–64. doi:10.1109/CPSNA.2014.22.
569. Chowdhury, S.M.; Badawy, M.O.; Sozer, Y.; Garcia, J.A.D.A. A Novel Battery Management System Using the Duality of the Adaptive Droop Control Theory. *IEEE Trans. Ind. Appl.* **2019**, *55*, 5078–5088. doi:10.1109/TIA.2019.2919497.
570. Frost, D.F.; Howey, D.A. Completely Decentralized Active Balancing Battery Management System. *IEEE Trans. Power Electron.* **2018**, *33*, 729–738. doi:10.1109/TPEL.2017.2664922.
571. Lafrenz, J.L.; Scheff, P.; Ricco, M.; Kerekes, T.; Olsen, R.L.; Teodorescu, R.; Liserre, M. Application Layer Design for Smart Battery Pack Control with Wi-Fi® Feedback. In Proceedings of the 2018 IEEE Energy Conversion Congress and Exposition (ECCE), Portland, OR, USA, 23–27 September 2018; pp. 5586–5590. doi:10.1109/ECCE.2018.8557584.

572. Vogt, T. Comparing wired vs. wireless solutions in automotive battery management systems. In *Automotive TI Tech Days 2020, Online, 22–24 September 2020*. Texas Instruments: TI Blvd., Dallas, Texas, USA, 2020.
573. ISO. *ISO 26262-(1-12):2018 Road Vehicles—Functional Safety*; 2018.
574. Tabatowski-Bush, B. Functional Safety for Battery Monitoring Integrated Circuits. In *Proceedings of the WCX™ 17: SAE World Congress Experience*, Detroit, MI, USA, 4–6 April 2017. doi:10.4271/2017-01-1202.
575. Lee, M.; Lee, J.; Lee, I.; Lee, J.; Chon, A. Wireless battery management system. In *Proceedings of the World Electric Vehicle Symposium and Exposition (EVS 27)*, Barcelona, Spain, 17–20 November 2013; IEEE: Piscataway, NJ, USA, 2013; pp. 1–5. doi:10.1109/EVS.2013.6914889.
576. Huang, X.; Sui, X.; Stroe, D.I.; Teodorescu, R. A Review of Management Architectures and Balancing Strategies in Smart Batteries. In *Proceedings of the IECON 2019—45th Annual Conference of the IEEE Industrial Electronics Society*, Lisbon, Portugal, 14–17 October 2019; pp. 5909–5914. doi:10.1109/IECON.2019.8926687.
577. Alonso, D.; Opalko, O.; Dostert, K. Channel Measurements and Simulations with Planar Inverted F-Antennas in an Enhanced Testbed for a Wireless Battery Management System. In *Proceedings of the WSA 2015; 19th International ITG Workshop on Smart Antennas*, Ilmenau, Germany, 3–5 March 2015; pp. 1–8.
578. Texas Instruments. BQ7961x-Q1 Family of 12S, 14S, 16S Precision Automotive Battery Monitor, Balancer and Integrated Hardware Protector, 2020.
579. Infineon. TLE9015QU BMS Transceiver IC—UART to iso UART, 2019.
580. NXP. MC33771B\_SDS Battery Cell Controller IC: Rev. 6.0 Product Short Data Sheet, 2020.
581. Kilic, A.; Koroglu, S.; Demircali, A.; Kesler, S.; Oner, Y.; Karakas, E.; Sergeant, P. Design of Master and Slave Modules on Battery Management System for Electric Vehicles. In *Proceedings of the (2017) 6th International Conference on Advanced Technology & Sciences (ICAT'Riga)*, Riga, Latvia, 12–15 September 2017; pp.161–166.
582. Toh, C.L.; Norum, L.E. A high speed control network synchronization jitter evaluation for embedded monitoring and control in modular multilevel converter. In *Proceedings of the 2013 IEEE Grenoble Conference*, Grenoble, France, 16–20 June 2013; pp. 1–6. doi:10.1109/PTC.2013.6652174.
583. Dan Burlacu, P.; Mathe, L.; Teodorescu, R. Synchronization of the distributed PWM carrier waves for modular multilevel converters. In *Proceedings of the 2014 International Conference on Optimization of Electrical and Electronic Equipment (OPTIM)*, Bran, Romania, 22–24 May 2014; pp. 553–559. doi:10.1109/OPTIM.2014.6851001.
584. IEEE. IEEE Standard for Ethernet Amendment 1: Physical Layer Specifications and Management Parameters for 100 Mbs Operation over a Single Balanced Twisted Pair Cable (100BASE-T1), 26 October 2015.
585. Bae, J.H.; Zhiguo, B.; Koo, B.J.; Kim, H.R.; Jang, D.G. The CAN communication application on the BMS. In *Proceedings of the 2013 International Conference on ICT Convergence (ICTC)*, Jeju, Korea, 14–16 October 2013; pp. 1140–1145. doi:10.1109/ICTC.2013.6675576.
586. Reindl, A.; Meier, H.; Niemetz, M. Software Framework for the Simulation of a Decentralized Battery Management System Consisting of Intelligent Battery Cells. In *Proceedings of the 2019 IEEE Student Conference on Research and Development (SCoReD)*, Bandar Seri Iskandar, Malaysia, 15–17 October 2019; pp. 75–80. doi:10.1109/SCORED.2019.8896284.
587. Bilbao J.; Varela C, Bravo E, Rodríguez M.; García O, G.P. Alternatives for a design of a Battery Management System for traction applications. In *Proceedings of the 2013 Proceedings of the 12th WSEAS*, Cambridge, MA, USA, 1–30 January 2013.
588. Alonso, D.; Opalko, O.; Sigle, M.; Dostert, K. Towards a Wireless Battery Management System: Evaluation of Antennas and Radio Channel Measurements Inside a Battery Emulator. In *Proceedings of the 2014 IEEE 80th Vehicular Technology Conference (VTC2014-Fall)*, Vancouver, BC, Canada, 14–17 September 2014; pp. 1–5. doi:10.1109/VTCFall.2014.6966212.
589. Robert Bosch GmbH. *CAN XL: Next, Step in CAN Evolution*; 2020.
590. Morello, R.; Schwarz, R.; Hoedemaekers, E.R.G.; Habenschaden, F.; Di Rienzo, R.; Roncella, R.; Saletti, R.; Rosca, B.; Steffenhagen, T.; Lorentz, V.R.H.; et al. Implementation and Test of a 48 V Smart Battery System with Integrated DC/DC Converter. In *Proceedings of the 2019 IEEE 28th International Symposium on Industrial Electronics (ISIE)*, Vancouver, BC, Canada, 12–14 June 2019. doi:10.1109/ISIE.2019.8781159.
591. Saleem, M.S. Development of PLC based Communication Architecture for Battery Management System. In *Proceedings of the 2020 IEEE 91st Vehicular Technology Conference (VTC2020-Spring)*, Antwerp, Belgium, 25–28 May 2020; pp. 1–5. doi:10.1109/VTC2020-Spring48590.2020.9128451.
592. Saidani, F.; Hutter, F.X.; Scurtu, R.G.; Braunwarth, W.; Burghartz, J.N. Lithium-ion battery models: a comparative study and a model-based powerline communication. *Adv. Radio Sci.* **2017**, *15*, 83–91. doi:10.5194/ars-15-83-2017.
593. Opalko, O.; Alonso, D.; Dostert, K. Measurements on Rogowski coils as coupling elements for power line communication in traction lithium-ion batteries. In *Proceedings of the 2015 IEEE International Symposium on Power Line Communications and Its Applications (ISPLC)*, Austin, TX, USA, 29 March–1 April 2015; pp. 29–34. doi:10.1109/ISPLC.2015.7147585.
594. Ouannes Ichraf.; Nickel Patrick.; Bernius Johannes.; Dostert, K. Physical Layer Performance Analysis of Power Line Communication (PLC) applied for Cell-Wise Monitoring of Automotive Lithium-Ion Batteries. In *Proceedings of the OFDM 2014; 18th International OFDM Workshop 2014 (InOWo'14)*, Essen, Germany, 27–28 August 2014; pp. 1–8.
595. Ouannes, I.; Nickel, P.; Dostert, K. Cell-wise monitoring of Lithium-ion batteries for automotive traction applications by using power line communication: battery modeling and channel characterization. In *Proceedings of the 18th IEEE Interna-*

- tional Symposium on Power Line Communications and Its Applications, Glasgow, UK, 30 March–2 April 2014; pp. 24–29. doi:10.1109/ISPLC.2014.6812322.
596. Lara, D.; Porter, D. Using Wireless Technologies to Replace Cables in Car Access and Battery Management Systems in Automotive, 21 August 2020.
  597. Kumbhar, S.; Faika, T.; Makwana, D.; Kim, T.; Lee, Y. Cybersecurity for Battery Management Systems in Cyber-Physical Environments. In Proceedings of the 2018 IEEE Transportation Electrification Conference and Expo (ITEC), Long Beach, CA, USA, 13–15 June 2018; pp. 934–938. doi:10.1109/ITEC.2018.8450159.
  598. Alonso, D.; Opalko, O.; Dostert, K. Parametrization of automotive lithium-ion batteries and its influence on the wireless in-battery channel. In Proceedings of the 2016 10th European Conference on Antennas and Propagation (EuCAP), Davos, Switzerland, 10–15 April 2016; pp. 1–5. doi:10.1109/EuCAP.2016.7481269.
  599. Mathew, S.A.; Prakash, R.; John, P.C. A smart wireless battery monitoring system for Electric Vehicles. In Proceedings of the 2012 12th International Conference on Intelligent Systems Design and Applications (ISDA), Kochi, India, 27–29 November 2012; pp. 189–193. doi:10.1109/ISDA.2012.6416535.
  600. Wu, Y.; Liao, X.; Chen, W.; Chen, D. A Battery Management System for electric vehicle based on Zigbee and CAN. In Proceedings of the 2011 4th International Congress on Image and Signal Processing, Shanghai, China, 15–17 October 2011; pp. 2517–2521. doi:10.1109/CISP.2011.6100781.
  601. Shell, C.; Henderson, J.; Verra, H.; Dyer, J. Implementation of a wireless battery management system (WBMS). In Proceedings of the 2015 IEEE International Instrumentation and Measurement Technology Conference (I2MTC) Proceedings, Pisa, Italy, 11–14 May 2015; pp. 1954–1959. doi:10.1109/I2MTC.2015.7151581.
  602. Huang, X.; Acharya, A.B.; Meng, J.; Sui, X.; Stroe, D.I.; Teodorescu, R. Wireless Smart Battery Management System for Electric Vehicles. In Proceedings of the 2020 IEEE Energy Conversion Congress and Exposition (ECCE), Detroit, MI, USA, 11–15 October 2020; pp. 5620–5625. doi:10.1109/ECCE44975.2020.9236279.
  603. Kumtachi, T.; Kinoshita, K.; Watanabe, T. Reliable wireless communications in battery management system of electric vehicles. In Proceedings of the 2017 Tenth International Conference on Mobile Computing and Ubiquitous Network (ICMU), Toyama, Japan, 3–5 October 2017; pp. 1–6. doi:10.23919/ICMU.2017.8330099.
  604. Faika, T.; Kim, T.; Khan, M. An Internet of Things (IoT)-Based Network for Dispersed and Decentralized Wireless Battery Management Systems. In Proceedings of the 2018 IEEE Transportation Electrification Conference and Expo (ITEC), Long Beach, CA, USA, 13–15 June 2018; pp. 1060–1064. doi:10.1109/ITEC.2018.8450161.
  605. Navitas Solutions Inc.. *Wireless Battery Management System: For smart Grid and Electric Vehicle Applications*; 2016.
  606. Greg Zimmer. *Wireless Battery Management Systems Highlight Industry's Drive for Higher Reliability*; February 2017.
  607. Analog Devices. Analog Devices Introduces Automotive Industry's First Wireless Battery Management System for Electric Vehicles: General Motors to Use ADI's Wireless Battery Management System Across its Ultium Battery Platform, 2020.
  608. Kleiner, J.; Heider, A.; Komsijska, L.; Elger, G.; Endisch, C. Experimental Study on the Thermal Interactions in Novel Intelligent Lithium-Ion Modules for Electric Vehicles. In Proceedings of the 2021 IEEE ITherm The Intersociety Conference on Thermal and Thermomechanical Phenomena in Electronic Systems, San Diego, CA, USA, 1–4 June 2021.
  609. Kleiner, J.; Heider, A.; Hanzl, C.; Komsijska, L.; Elger, G.; Endisch, C. Thermal Behavior of an Intelligent Li-Ion Cell under Vehicle Conditions. In Proceedings of the IECON 2020—46th Annual Conference of the IEEE Industrial Electronics Society, Singapore, 18–21 October 2020; pp. 2081–2086. doi:10.1109/IECON43393.2020.9254336.
  610. Chang, F.; Roemer, F.; Lienkamp, M. Influence of Current Ripples in Cascaded Multilevel Topologies on the Aging of Lithium Batteries. *IEEE Trans. Power Electron.* **2020**, *35*, 11879–11890. doi:10.1109/TPEL.2020.2989145.
  611. Uno, M.; Tanaka, K. Influence of High-Frequency Charge–Discharge Cycling Induced by Cell Voltage Equalizers on the Life Performance of Lithium-Ion Cells. *IEEE Trans. Veh. Technol.* **2011**, *60*, 1505–1515. doi:10.1109/TVT.2011.2127500.
  612. Lewerenz, M.; Fuchs, G.; Becker, L.; Sauer, D.U. Irreversible calendar aging and quantification of the reversible capacity loss caused by anode overhang. *J. Energy Storage* **2018**, *18*, 149–159. doi:10.1016/j.est.2018.04.029.
  613. Wong, D.; Shrestha, B.; Wetz, D.A.; Heinzl, J.M. Impact of high rate discharge on the aging of lithium nickel cobalt aluminum oxide batteries. *J. Power Sources* **2015**, *280*, 363–372. doi:10.1016/j.jpowsour.2015.01.110.
  614. Soares, R.; Bessman, A.; Wallmark, O.; Lindbergh, G.; Svens, P. An Experimental Setup with Alternating Current Capability for Evaluating Large Lithium-Ion Battery Cells. *Batteries* **2018**, *4*, 38. doi:10.3390/batteries4030038.
  615. Prasad, R.; Namuduri, C.; Kollmeyer, P. Onboard unidirectional automotive G2V battery charger using sine charging and its effect on li-ion batteries. In Proceedings of the 2015 IEEE Energy Conversion Congress and Exposition (ECCE), Montreal, QC, Canada, 20–24 September 2015; pp. 6299–6305. doi:10.1109/ECCE.2015.7310543.
  616. Korth Pereira Ferraz, P.; Kowal, J. A Comparative Study on the Influence of DC/DC-Converter Induced High Frequency Current Ripple on Lithium-Ion Batteries. *Sustainability* **2019**, *11*, 6050. doi:10.3390/su11216050.
